# Supplementary material
Source: PubMed Central journal article supplement (PMC3497801)
Supplement: 1205374109_sd01.pdf [file 1205374109_sd01.pdf]

Suppl Table 1

**Dataset S 1A: Genes showing a larger saline to OVA differential in congenic *Tgfbm2/3* than NIH mice**  
 **$\Delta Tgfbm2/3$  S-O >  $\Delta$ NIH S-O**

| Probe ID        | GeneName      | logFC.NIH          | logFC.<br><i>Tgfbm2/3</i> | P.Value.NIH        | adj.P.Val. NIH     | P.Value.<br><i>Tgfbm2/3</i> | adj.P.Val.<br><i>Tgfbm2/3</i> | M = logFC diff      | A = logFC avg      | Abs(M/A)           | Abs logFC<br>ratio | P.Value.<br>Interaction |
|-----------------|---------------|--------------------|---------------------------|--------------------|--------------------|-----------------------------|-------------------------------|---------------------|--------------------|--------------------|--------------------|-------------------------|
| 10545239        |               | -0.308626879       | 0.884954884               | 0.018682813        | 0.12286806         | 3.31E-006                   | 0.000271807                   | -1.193581764        | 0.288164002        | 4.142022438        | 0.348748716        | 5.52E-006               |
| 10511252        | Ube2j2        | 0.214618605        | -0.56341139               | 0.095127983        | 0.319767556        | 0.000393697                 | 0.008659317                   | 0.778029995         | -0.174396393       | 4.461273443        | 0.38092699         | 0.000481689             |
| 10358597        | Hmcn1         | -0.388423691       | -1.112229124              | 0.004145202        | 0.045489116        | 1.89E-007                   | 3.32E-005                     | 0.723805433         | -0.750326408       | 0.964654083        | 0.349229923        | 0.000521606             |
| 10345077        | Khdc1a        | 0.352051612        | -0.490643838              | 0.026536451        | 0.152927171        | 0.004014515                 | 0.045744813                   | 0.84269545          | -0.069296113       | 12.16078958        | 0.717529875        | 0.000972586             |
| 10513266        | Olfir267      | -0.240282801       | 0.386461198               | 0.040249909        | 0.195291317        | 0.002849374                 | 0.03608176                    | -0.626743999        | 0.073089198        | 8.575056433        | 0.621751427        | 0.00103044              |
| 10597918        |               | 0.219558404        | -0.384416532              | 0.053696244        | 0.231176651        | 0.002589831                 | 0.033790071                   | 0.603974936         | -0.082429064       | 7.327208488        | 0.571114714        | 0.00118695              |
| 10450892        | Olfir113      | -0.168825825       | 0.431256631               | 0.125663476        | 0.370154935        | 0.001070516                 | 0.017877692                   | -0.600082456        | 0.131215403        | 4.573262298        | 0.391474154        | 0.00121415              |
| 10594798        |               | 0.151033808        | -0.565898937              | 0.25129015         | 0.527243661        | 0.000593523                 | 0.011602855                   | 0.716932745         | -0.207432564       | 3.456220808        | 0.266891839        | 0.00141939              |
| 10358601        | Hmcn1         | -0.607546672       | -1.277179193              | 0.000299953        | 0.007020476        | 1.30E-007                   | 2.52E-005                     | 0.669632521         | -0.942362933       | 0.710588774        | 0.475694151        | 0.00219577              |
| 10578320        | Gm8423        | 0.186842209        | -0.510445181              | 0.176591466        | 0.440927952        | 0.001802303                 | 0.026018849                   | 0.69728739          | -0.161801486       | 4.309524029        | 0.366037758        | 0.00232055              |
| 10544638        | Tra2a         | 0.014222311        | -0.658015536              | 0.911973971        | 0.963790674        | 0.000164515                 | 0.004565155                   | 0.672237847         | -0.321896612       | 2.088365707        | 0.021613944        | 0.00233377              |
| <b>10493856</b> | <b>Sprr2a</b> | <b>0.742792311</b> | <b>1.394091407</b>        | <b>4.61E-005</b>   | <b>0.001816896</b> | <b>4.57E-008</b>            | <b>1.15E-005</b>              | <b>-0.651299096</b> | <b>1.068441859</b> | <b>6.09578416</b>  | <b>0.53281464</b>  | <b>0.00265313</b>       |
| <b>10493858</b> | <b>Sprr2a</b> | <b>0.742792311</b> | <b>1.394091407</b>        | <b>4.61E-005</b>   | <b>0.001816896</b> | <b>4.57E-008</b>            | <b>1.15E-005</b>              | <b>-0.651299096</b> | <b>1.068441859</b> | <b>6.09578416</b>  | <b>0.53281464</b>  | <b>0.00265313</b>       |
| 10435787        |               | -0.332610547       | -1.19556279               | 0.066676032        | 0.262410361        | 6.88E-006                   | 0.000441899                   | 0.862952243         | -0.764086668       | 1.129390524        | 0.278204164        | 0.00280757              |
| 10562603        |               | 0.095986434        | 0.718592734               | 0.4477484          | 0.701381378        | 5.50E-005                   | 0.002025707                   | -0.6226063          | 0.407289584        | 1.528657555        | 0.13357557         | 0.00327362              |
| <b>1059043</b>  | <b>Muc5ac</b> | <b>0.558372248</b> | <b>1.121930009</b>        | <b>0.000228636</b> | <b>0.00578846</b>  | <b>1.54E-007</b>            | <b>2.85E-005</b>              | <b>-0.563557761</b> | <b>0.840151129</b> | <b>0.670781412</b> | <b>0.497689022</b> | <b>0.0032878</b>        |
| 10349968        | Chi3l1        | 1.632572291        | 2.337826058               | 2.61E-008          | 7.34E-006          | 3.17E-010                   | 4.07E-007                     | -0.705253767        | 1.985199174        | 0.355255924        | 0.698329238        | 0.00330373              |
| 10403750        | 2810021B07Rik | 0.059977515        | -0.549992367              | 0.633668458        | 0.823699536        | 0.000619501                 | 0.01193795                    | 0.609969882         | -0.245007426       | 2.48959753         | 0.109051541        | 0.00382426              |
| 10523156        | Cxcl2         | 0.044259943        | 0.73452155                | 0.756103217        | 0.887631667        | 0.00015095                  | 0.004276583                   | -0.690261608        | 0.389390746        | 1.772670805        | 0.060256833        | 0.00390593              |
| 10379518        | Ccl7          | 0.865467699        | 1.42521818                | 4.03E-006          | 0.000303833        | 1.28E-008                   | 5.06E-006                     | -0.559750481        | 1.14534294         | 0.488718672        | 0.607252778        | 0.00422167              |
| 10423791        | 4930447A16Rik | -0.342724011       | -0.882022132              | 0.009341477        | 0.078962268        | 2.72E-006                   | 0.000235327                   | 0.539298121         | -0.612373071       | 0.880669229        | 0.388566226        | 0.00482045              |
| 10564417        | Aldh1a3       | 0.090381884        | 0.577863366               | 0.393944672        | 0.659391708        | 7.99E-005                   | 0.002662231                   | -0.487481483        | 0.334122625        | 1.458989743        | 0.156407014        | 0.00507289              |
| 10417144        | Timm8a2       | -0.134653296       | 0.3502912                 | 0.210181948        | 0.482480796        | 0.00446472                  | 0.049373163                   | -0.484944496        | 0.107818952        | 4.497766743        | 0.384403879        | 0.00513126              |
| 10484704        | Olfir1157     | 0.138568789        | -0.392880158              | 0.238686321        | 0.513933436        | 0.003885088                 | 0.045021032                   | 0.531448947         | -0.127155685       | 4.179513866        | 0.352699891        | 0.00520782              |
| 10497077        |               | 0.162836143        | -0.434709034              | 0.219497777        | 0.492746978        | 0.00433975                  | 0.048452674                   | 0.597545177         | -0.135936446       | 4.395768722        | 0.374586516        | 0.00522562              |
| 10537296        |               | -0.25971914        | -0.834868034              | 0.052162303        | 0.227783057        | 1.12E-005                   | 0.000630904                   | 0.575148895         | -0.547293587       | 1.050896463        | 0.311090051        | 0.00524188              |
| 10543460        | 6332401O19Rik | 0.149801926        | 0.641293428               | 0.173580122        | 0.436980637        | 3.36E-005                   | 0.001381778                   | -0.491491502        | 0.395547677        | 1.242559445        | 0.233593422        | 0.00530081              |
| <b>10499899</b> | <b>Sprr1a</b> | <b>0.878605495</b> | <b>1.46964131</b>         | <b>9.33E-006</b>   | <b>0.000554173</b> | <b>2.75E-008</b>            | <b>8.21E-006</b>              | <b>-0.591035814</b> | <b>1.174123403</b> | <b>0.503384749</b> | <b>0.59783669</b>  | <b>0.00547029</b>       |
| 10542317        | Cdkn1b        | -0.047808316       | -0.574992646              | 0.677395952        | 0.847969937        | 0.000194987                 | 0.005170368                   | 0.527184331         | -0.311400481       | 1.692946423        | 0.08314596         | 0.00552585              |
| 10601844        | Bhlhb9        | 0.094062224        | -0.447094724              | 0.434750386        | 0.691924135        | 0.00206854                  | 0.028731216                   | 0.541156948         | -0.17651625        | 3.065762777        | 0.210385449        | 0.00596235              |
| 10583418        | Olfir857      | 0.090938763        | -0.465604872              | 0.462183982        | 0.712611209        | 0.001887871                 | 0.026906091                   | 0.556543634         | -0.187333054       | 2.970877917        | 0.195313169        | 0.00596416              |
| 10548345        | Klrk1         | 0.010884142        | 0.57276359                | 0.929841968        | 0.972186706        | 0.000393641                 | 0.008659317                   | -0.561879448        | 0.291823866        | 1.925406086        | 0.019002853        | 0.0059843               |
| 10415608        | Ift88         | 0.025646738        | -0.460890208              | 0.812116093        | 0.915596955        | 0.000766803                 | 0.013978906                   | 0.486536946         | -0.217621735       | 2.23570015         | 0.05564609         | 0.0062522               |
| 10493831        | S100a8        | -0.738487168       | -1.42162911               | 0.000253751        | 0.006250291        | 2.91E-007                   | 4.55E-005                     | 0.683141942         | -1.080058139       | 0.632504786        | 0.519465424        | 0.00629861              |
| 10549982        | V1rg2         | 0.02884898         | 0.50491797                | 0.786581983        | 0.902311142        | 0.000320682                 | 0.007449103                   | -0.47606899         | 0.266883475        | 1.783808421        | 0.057135974        | 0.00660843              |
| 10584514        | Olfir972      | -0.123091326       | 0.394849113               | 0.302905312        | 0.581827557        | 0.004363481                 | 0.048590818                   | -0.51794044         | 0.135878894        | 3.811779934        | 0.311742694        | 0.00705435              |
| 10472398        | Scn2a1        | 0.056859948        | 0.550510035               | 0.613493973        | 0.81144854         | 0.000235758                 | 0.005956189                   | -0.493650088        | 0.303684992        | 1.625533371        | 0.103285942        | 0.00725462              |
| 10581917        | 4932417116Rik | 0.079304828        | -0.37185617               | 0.446421842        | 0.700403068        | 0.002749636                 | 0.035119592                   | 0.451160998         | -0.146275671       | 3.084320135        | 0.213267478        | 0.00751859              |
| 10379511        | Ccl2          | 0.798013652        | 1.364428694               | 3.98E-005          | 0.0016212          | 1.15E-007                   | 2.24E-005                     | -0.566415041        | 1.081221173        | 0.523866028        | 0.584870178        | 0.00943921              |
| 10403036        | Igh           | 0.192608312        | 2.085028809               | 0.674120547        | 0.845934172        | 0.000444609                 | 0.009457121                   | -1.892420497        | 1.138818561        | 1.661740125        | 0.092376811        | 0.0104313               |
| 10358599        | Hmcn1         | -0.438464447       | -1.005757625              | 0.006193793        | 0.059902889        | 4.55E-006                   | 0.000328193                   | 0.567293178         | -0.722111036       | 0.785603806        | 0.435954385        | 0.0105742               |
| 10587799        | Plscr2        | -0.915679276       | -1.451095787              | 6.89E-006          | 0.000440098        | 3.72E-008                   | 1.01E-005                     | 0.535416511         | -1.183387532       | 0.452443934        | 0.631026073        | 0.0107456               |
| 10436596        | 2810055G20Rik | 0.063063646        | -0.407415363              | 0.592565049        | 0.798958925        | 0.003576798                 | 0.042433065                   | 0.47047901          | -0.172175859       | 2.732549229        | 0.154789563        | 0.0125108               |
| 10356329        | Ncl           | 0.096463107        | -0.605256699              | 0.586343354        | 0.795057546        | 0.003886809                 | 0.045021032                   | 0.701719806         | -0.254396796       | 2.758367307        | 0.159375529        | 0.0131011               |
| 10420497        | Gm6907        | 0.180982084        | 0.683231335               | 0.167710797        | 0.429940832        | 9.81E-005                   | 0.003071409                   | -0.50224925         | 0.432106709        | 1.162326896        | 0.26489137         | 0.0131825               |
| 10438423        | Olfir165      | 0.041947549        | 0.590290509               | 0.762325491        | 0.89040115         | 0.000785626                 | 0.014201021                   | -0.548342961        | 0.316119029        | 1.734609152        | 0.071062549        | 0.0134895               |
| 10396419        |               | -0.250244653       | -0.821273611              | 0.10175305         | 0.331218276        | 6.31E-005                   | 0.002249824                   | 0.571028958         | -0.535759132       | 1.065831498        | 0.304703146        | 0.0138657               |
| 10422699        |               | -0.061967684       | -0.50194977               | 0.5817742          | 0.7924554          | 0.000515329                 | 0.010482369                   | 0.439982087         | -0.281958727       | 1.560448549        | 0.123453954        | 0.013988                |
| 10404341        | Pri4a1        | 0.040007552        | -0.369544295              | 0.701932752        | 0.860646185        | 0.003128142                 | 0.03863963                    | 0.409551847         | -0.164768371       | 2.485621746        | 0.108261858        | 0.0140883               |
| 10367591        | Myc1          | -0.278303366       | -0.781701624              | 0.0458066          | 0.211164477        | 3.16E-005                   | 0.001317706                   | 0.503398258         | -0.530002495       | 0.949803563        | 0.356022499        | 0.0143323               |
| 10591614        | Dock6         | -0.702324799       | -1.33737737               | 0.000724081        | 0.0113361398       | 1.34E-006                   | 0.000140131                   | 0.635052571         | -1.019851085       | 0.62269147         | 0.525150803        | 0.0147848               |

Suppl Table 1

|                 |               |                     |                    |                    |                    |                    |                    |                     |                     |                    |                    |                  |
|-----------------|---------------|---------------------|--------------------|--------------------|--------------------|--------------------|--------------------|---------------------|---------------------|--------------------|--------------------|------------------|
| 10591630        | Dock6         | -0.233177954        | -0.700304188       | 0.069326394        | 0.268093583        | 4.80E-005          | 0.001835198        | 0.467126234         | -0.466741071        | 1.000825218        | 0.332966671        | 0.0148904        |
| 10431585        | Chkb          | 0.052689601         | -0.39134669        | 0.6466413          | 0.830688599        | 0.004003783        | 0.045675152        | 0.444036291         | -0.169328544        | 2.622335724        | 0.134636634        | 0.0150892        |
| 10358619        | Hmcn1         | -0.354594943        | -0.860324706       | 0.015795846        | 0.110304664        | 1.38E-005          | 0.00072461         | 0.505729763         | -0.607459824        | 0.832532035        | 0.412164082        | 0.0150994        |
| 10458046        | D0H4S114      | 0.03566805          | -0.415101492       | 0.759463406        | 0.888833974        | 0.002981198        | 0.0037382211       | 0.450769542         | -0.189716721        | 2.376013775        | 0.085926095        | 0.0151472        |
| 10358633        | Hmcn1         | -0.729019982        | -1.212853105       | 4.72E-005          | 0.00184828         | 1.94E-007          | 3.33E-005          | 0.483833123         | -0.970936543        | 0.498315905        | 0.601078547        | 0.0151679        |
| 10534966        | Zfp113        | 0.015664575         | -0.451765541       | 0.897030459        | 0.95676885         | 0.002168603        | 0.02971901         | 0.467430115         | -0.218050483        | 2.143678423        | 0.034674125        | 0.0154377        |
| 10364153        | Gm9744        | -0.068679615        | -0.516050468       | 0.556873574        | 0.775716998        | 0.000559162        | 0.011091639        | 0.447370853         | -0.292365042        | 1.530179018        | 0.133087013        | 0.0156495        |
| 10358513        | Hmcn1         | -0.489354992        | -0.950144971       | 0.001092346        | 0.017927332        | 1.91E-006          | 0.000179184        | 0.460789979         | -0.719749982        | 0.640208392        | 0.515031924        | 0.0156927        |
| 10476880        | A530006G24Rik | -0.08758387         | -0.573198774       | 0.493598692        | 0.7341944          | 0.00048396         | 0.010034153        | 0.485614904         | -0.330391322        | 1.469817368        | 0.152798426        | 0.0161293        |
| 10417759        | Ube2e2        | -0.005370332        | -0.433050302       | 0.961878951        | 0.986077611        | 0.001716554        | 0.0251057          | 0.42767997          | -0.219210317        | 1.951002926        | 0.012401174        | 0.0166886        |
| <b>10520452</b> | <b>Il6</b>    | <b>1.487872173</b>  | <b>2.096939886</b> | <b>3.40E-007</b>   | <b>5.07E-005</b>   | <b>5.75E-009</b>   | <b>2.80E-006</b>   | <b>-0.609067713</b> | <b>1.792406029</b>  | <b>0.339804544</b> | <b>0.709544505</b> | <b>0.0170863</b> |
| 10601846        | 2900062L11Rik | -0.469866617        | -0.950115226       | 0.002371368        | 0.031046342        | 3.80E-006          | 0.000292666        | 0.48024861          | -0.709990921        | 0.676415142        | 0.494536456        | 0.0175751        |
| 10366346        | Phlda1        | 0.340056763         | 0.779696851        | 0.011511645        | 0.089866456        | 1.37E-005          | 0.000721632        | -0.439640088        | 0.559876807         | 0.785244329        | 0.436139716        | 0.0186651        |
| 10488409        | 9230104L09Rik | -0.784130851        | -1.183308887       | 5.12E-006          | 0.000359269        | 4.79E-008          | 1.18E-005          | 0.399178035         | -0.983719869        | 0.405784256        | 0.66265948         | 0.0195345        |
| 10601303        | Chic1         | -0.270328689        | -0.68108844        | 0.028406416        | 0.158672272        | 3.12E-005          | 0.00130617         | 0.410759751         | -0.475708565        | 0.86346932         | 0.396906882        | 0.0200681        |
| 10499861        | S100a9        | -0.453022035        | -1.068838908       | 0.017448446        | 0.117612056        | 2.23E-005          | 0.001025495        | 0.615816873         | -0.760930471        | 0.809294537        | 0.423845007        | 0.0213374        |
| 10584580        |               | -0.028383148        | -0.507507803       | 0.830112491        | 0.92395505         | 0.001764965        | 0.025652954        | 0.479124655         | -0.267945475        | 1.788142362        | 0.055926525        | 0.0214149        |
| 10409276        |               | 0.292441238         | 0.97868921         | 1.139844451        | 0.392286294        | 0.000151753        | 0.004285143        | -0.686247972        | 0.635565224         | 1.07974437         | 0.298890906        | 0.0215909        |
| 10358605        | Hmcn1         | -0.493107952        | -0.899386403       | 0.000617365        | 0.011968679        | 1.74E-006          | 0.000169011        | 0.40627845          | -0.696247177        | 0.583526172        | 0.548271522        | 0.0216153        |
| 10496539        | Gbp5          | 0.29039572          | 0.930676987        | 0.118389519        | 0.358478491        | 0.000128525        | 0.003805064        | -0.640281267        | 0.610536354         | 1.048719315        | 0.312026325        | 0.0216917        |
| 10514645        |               | -0.000192927        | 0.386778567        | 0.998563331        | 0.999341998        | 0.002758257        | 0.035170859        | -0.386971494        | 0.19329282          | 2.001996213        | 0.000498804        | 0.0218155        |
| 10403303        | Akr1c13       | 0.088967939         | 0.515307856        | 0.456963715        | 0.708079371        | 0.000660058        | 0.012485169        | -0.426339918        | 0.302137898         | 1.411077264        | 0.172650072        | 0.0220463        |
| 10453057        | Cyp11b1       | 0.358808453         | 0.805121671        | 0.011393476        | 0.089460495        | 1.67E-005          | 0.000828415        | -0.446313218        | 0.581965062         | 0.766907238        | 0.445657428        | 0.02245          |
| 10508972        | Gms589        | -0.104180193        | -0.538587337       | 0.398136688        | 0.662434206        | 0.000574022        | 0.011333853        | 0.434407144         | -0.321383765        | 1.351677312        | 0.193432311        | 0.0229822        |
| 10358591        | Hmcn1         | -0.362344863        | -0.772569208       | 0.006836559        | 0.064177196        | 1.17E-005          | 0.000645914        | 0.410224345         | -0.567457035        | 0.722917013        | 0.46901282         | 0.0233342        |
| 10358607        | Hmcn1         | -0.537881328        | -0.985511764       | 0.000793021        | 0.01431453         | 2.32E-006          | 0.000207553        | 0.447360435         | -0.761696546        | 0.587675548        | 0.545788846        | 0.0239296        |
| 10387733        | Eif5a         | 0.249085199         | 0.660673572        | 0.048638187        | 0.218412348        | 6.41E-005          | 0.002275597        | -0.411588372        | 0.454879386         | 0.904829687        | 0.377017048        | 0.0245551        |
| 10359582        | Fmo2          | -0.952471273        | -1.527583879       | 4.76E-005          | 0.001855733        | 3.00E-007          | 4.63E-005          | 0.575112606         | -1.240027576        | 0.463790175        | 0.623514876        | 0.0246115        |
| 10574023        | Mi2           | 0.651685525         | 1.358669825        | 0.005926224        | 0.058003949        | 1.16E-005          | 0.0006449          | -0.7069843          | 1.005177675         | 0.703342621        | 0.479649664        | 0.0256706        |
| 10400072        | Scin          | 0.947785714         | 1.348437471        | 1.24E-006          | 0.000129236        | 2.06E-008          | 6.60E-006          | -0.400651757        | 1.148111592         | 0.348965867        | 0.702877022        | 0.0257701        |
| 10587446        | Myo6          | -0.454417551        | -0.818674954       | 0.000707016        | 0.013103023        | 2.39E-006          | 0.000212202        | 0.364257403         | -0.636546253        | 0.572240276        | 0.555064679        | 0.0267446        |
| 10435841        | Ccdc52        | -0.001894437        | -0.434016784       | 0.987918961        | 0.995637987        | 0.003631232        | 0.042853963        | 0.432122347         | -0.21795561         | 1.982616303        | 0.004364894        | 0.0270569        |
| 10523138        | Cxcl3         | 0.489733906         | 0.915214822        | 0.001360667        | 0.020851109        | 3.96E-006          | 0.000298636        | -0.425480915        | 0.702474364         | 0.605688886        | 0.535102683        | 0.0270711        |
| 10358672        | Hmcn1         | -0.156409892        | -0.521863867       | 0.156882825        | 0.415269501        | 0.000235059        | 0.005956077        | 0.365453975         | -0.33913688         | 1.077600216        | 0.299713972        | 0.0274588        |
| 10421950        | Dach1         | -0.113261935        | -0.478059751       | 0.295578889        | 0.575105963        | 0.0004983206       | 0.010184722        | 0.364797816         | -0.295660843        | 1.233838786        | 0.23692004         | 0.0274594        |
| 10384229        |               | -0.123867057        | -0.563869835       | 0.344520635        | 0.618186345        | 0.000630777        | 0.01210074         | 0.440002778         | -0.343868446        | 1.279567182        | 0.219673139        | 0.0284099        |
| 10536593        | Tsen15        | -0.169941407        | -0.595663201       | 0.187966766        | 0.455464075        | 0.000302498        | 0.007110369        | 0.425721794         | -0.382802304        | 1.112119204        | 0.285297811        | 0.0285429        |
| 10376326        | Irgm2         | 0.189596197         | 0.719569434        | 0.237159594        | 0.512219744        | 0.000408913        | 0.008897584        | -0.529973237        | 0.454582815         | 1.165845297        | 0.263485618        | 0.0292019        |
| 10358593        | Hmcn1         | -0.437452226        | -0.984874438       | 0.015970145        | 0.111059791        | 3.02E-005          | 0.00127416         | 0.547422212         | -0.711163332        | 0.769755958        | 0.444170555        | 0.0292514        |
| 10368240        | Tcf21         | -0.477779844        | -0.835608792       | 0.000475477        | 0.009930462        | 1.95E-006          | 0.000182344        | 0.357828948         | -0.656694318        | 0.544894235        | 0.571774554        | 0.0293494        |
| 10491617        | 4932438A13Rik | -0.046545203        | -0.405379238       | 0.664999325        | 0.841135091        | 0.001961292        | 0.027645489        | 0.358834035         | -0.22596222         | 1.588026681        | 0.114818912        | 0.0311208        |
| 10393662        | Nptx1         | -0.167586761        | -0.523477415       | 0.132728005        | 0.381379428        | 0.000236224        | 0.005956189        | 0.355890654         | -0.345532088        | 1.029978593        | 0.32014134         | 0.0315433        |
| 10403834        | Sfrp4         | 0.005600388         | 0.413494882        | 0.963494724        | 0.986595228        | 0.00432843         | 0.04838944         | -0.407894494        | 0.209547635         | 1.946547831        | 0.013544032        | 0.0318495        |
| 10422942        |               | -0.067190216        | -0.724939023       | 0.734982008        | 0.877465962        | 0.002498882        | 0.033022218        | 0.657748807         | -0.39606462         | 1.660710838        | 0.092683956        | 0.0323847        |
| 10384504        | Meis1         | -0.221959049        | -0.597053641       | 0.067074844        | 0.263330537        | 0.000125171        | 0.003727264        | 0.375094593         | -0.409506345        | 0.915967719        | 0.371757298        | 0.0328229        |
| 10402757        | A730018C14Rik | -0.075989107        | -0.457464481       | 0.515840931        | 0.749938283        | 0.001442647        | 0.022266902        | 0.381475374         | -0.266726794        | 1.430210171        | 0.166109305        | 0.0338102        |
| 10595404        | Fam46a        | 0.294305074         | 0.633915533        | 0.012784267        | 0.096371972        | 3.12E-005          | 0.001304522        | -0.33961046         | 0.464110304         | 0.731745141        | 0.46426544         | 0.0350178        |
| 10397984        | Ppp4r4        | -0.69881753         | -1.124578073       | 0.000107824        | 0.003326464        | 7.66E-007          | 9.59E-005          | 0.425760543         | -0.911697801        | 0.466997444        | 0.621404193        | 0.0350192        |
| 10559095        | Muc5b         | 0.384602549         | 0.921801379        | 0.033194793        | 0.174099703        | 7.11E-005          | 0.002425023        | -0.53719883         | 0.653201964         | 0.822408474        | 0.417229305        | 0.0350682        |
| 10513145        | Ptpn3         | -0.30111147         | -0.438147485       | 0.809983879        | 0.91476004         | 0.003399788        | 0.041046923        | 0.408036015         | -0.234129478        | 1.742779335        | 0.068724507        | 0.0350788        |
| 10545569        | Reg3g         | 1.962911095         | 3.066181935        | 5.12E-005          | 0.001960388        | 4.43E-007          | 0.31E-005          | -1.10327084         | 2.514546515         | 0.438755391        | 0.640180895        | 0.0354176        |
| <b>10480459</b> | <b>Hnmt</b>   | <b>-0.181036336</b> | <b>-0.54755857</b> | <b>0.130068679</b> | <b>0.377115425</b> | <b>0.000293544</b> | <b>0.006970102</b> | <b>0.366522234</b>  | <b>-0.364297453</b> | <b>1.006107044</b> | <b>0.330624606</b> | <b>0.0376644</b> |
| 10387855        | Alox15        | 0.355375478         | 0.849610159        | 0.035084624        | 0.17978681         | 8.20E-005          | 0.002719755        | -0.494234681        | 0.602492819         | 0.820316301        | 0.418280637        | 0.0377307        |
| 10358631        | Hmcn1         | -0.545280699        | -0.948060968       | 0.000684686        | 0.012816153        | 3.37E-006          | 0.000273046        | 0.402780269         | -0.746670834        | 0.53943485         | 0.575153622        | 0.0379584        |
| 10476297        |               | -0.097885383        | -0.460462759       | 0.396447669        | 0.661381695        | 0.00118691         | 0.019221196        | 0.362577376         | -0.279174071        | 1.298750181        | 0.212580456        | 0.0388349        |
| 10500529        | Phgdh         | -0.118376865        | -0.490025749       | 0.322481158        | 0.599510853        | 0.000927065        | 0.016081915        | 0.371648883         | -0.304201307        | 1.221720207        | 0.241572745        | 0.0398315        |

Suppl Table 1

|          |               |              |              |             |             |             |             |              |              |             |             |           |
|----------|---------------|--------------|--------------|-------------|-------------|-------------|-------------|--------------|--------------|-------------|-------------|-----------|
| 10538305 | 5730596B20Rik | -0.051627421 | -0.416174132 | 0.655775223 | 0.836850525 | 0.002771208 | 0.03526592  | 0.364546711  | -0.233900777 | 1.558552803 | 0.124052451 | 0.0402235 |
| 10447461 | Ston1         | -0.45354488  | -0.863285414 | 0.003532584 | 0.040656533 | 1.32E-005   | 0.000707672 | 0.409740535  | -0.658415147 | 0.622313348 | 0.52537072  | 0.0409393 |
| 10476725 | Gm561         | -0.087960747 | -0.532223054 | 0.538707595 | 0.76445011  | 0.002109616 | 0.029097058 | 0.444262307  | -0.3100919   | 1.432679494 | 0.165270456 | 0.0419546 |
| 10577230 | Erich1        | -0.120985795 | -0.522431725 | 0.354335306 | 0.625721726 | 0.001138233 | 0.018632754 | 0.40144593   | -0.32170876  | 1.24785514  | 0.231582022 | 0.042078  |
| 10358549 | Hmnc1         | -0.288532467 | -0.675273653 | 0.033652725 | 0.175510725 | 9.17E-005   | 0.0029289   | 0.386741186  | -0.48190306  | 0.802529012 | 0.427282281 | 0.0423741 |
| 10590620 | Ccr9          | 0.34753463   | 0.770791254  | 0.02146376  | 0.133797033 | 6.15E-005   | 0.002212614 | -0.423256624 | 0.559162942  | 0.756946843 | 0.45088035  | 0.0423979 |
| 10392010 | 1700081L11Rik | -0.189246961 | -0.587481619 | 0.154808901 | 0.412567205 | 0.000419542 | 0.009064647 | 0.398234658  | -0.38836429  | 1.025415231 | 0.322132565 | 0.0425512 |
| 10533858 | Elf2b1        | 0.230102633  | 0.573737215  | 0.053676429 | 0.231130107 | 0.000144979 | 0.004181271 | -0.343634581 | 0.401919924  | 0.854982699 | 0.401059278 | 0.0431708 |
| 10358547 | Hmnc1         | -0.424981413 | -0.863502434 | 0.008957634 | 0.076590458 | 3.00E-005   | 0.001273293 | 0.438521021  | -0.644241924 | 0.68067756  | 0.492160064 | 0.0432758 |
| 10607752 | Bmx           | -0.397839767 | -0.759456539 | 0.0040779   | 0.044884881 | 1.59E-005   | 0.00080144  | 0.361616772  | -0.578648153 | 0.62493377  | 0.523847971 | 0.0436067 |
| 10475350 | Serf2         | -0.035483479 | -0.426955389 | 0.779807971 | 0.898150901 | 0.004416373 | 0.049030905 | 0.391471909  | -0.231219434 | 1.693075287 | 0.083108166 | 0.0442031 |
| 10407124 | Al452195      | -0.035302091 | -0.393221045 | 0.761720853 | 0.890055576 | 0.004292286 | 0.048090089 | 0.357918954  | -0.214261568 | 1.670476684 | 0.089776709 | 0.044749  |
| 10351509 | Fcgr4         | 0.298649122  | 0.753264457  | 0.061135709 | 0.249242594 | 0.00017861  | 0.004841154 | -0.454615334 | 0.525956789  | 0.864358714 | 0.396473137 | 0.0459619 |
| 10450325 | Cfb           | 0.864120024  | 1.230305129  | 5.46E-006   | 0.000375774 | 1.02E-007   | 2.07E-005   | -0.366185105 | 1.047212576  | 0.349676    | 0.702362368 | 0.0462428 |
| 10474201 | Lmo2          | -0.160123918 | -0.495983021 | 0.161781907 | 0.421756854 | 0.000497949 | 0.010237815 | 0.335859103  | -0.328053469 | 1.023793784 | 0.322841531 | 0.0464435 |
| 10481949 | Traf1         | -0.056434578 | -0.409188528 | 0.628384925 | 0.820499758 | 0.003250727 | 0.039808993 | 0.352753951  | -0.232811553 | 1.515190917 | 0.137918279 | 0.0472172 |
| 10509568 | Camk2n1       | -0.575034327 | -0.894901175 | 8.99E-005   | 0.002919689 | 8.99E-007   | 0.000105337 | 0.319866847  | -0.734967751 | 0.435212085 | 0.642567407 | 0.0473349 |
| 10422244 | Slitrk6       | -0.463730467 | -0.870234572 | 0.003700973 | 0.041959615 | 1.64E-005   | 0.00081651  | 0.406504105  | -0.66698252  | 0.609467404 | 0.53879849  | 0.047655  |
| 10380398 | Chad          | 0.076921463  | 0.64779241   | 0.684466199 | 0.851495277 | 0.003892951 | 0.045051514 | -0.570870947 | 0.362356936  | 1.575438164 | 0.118744002 | 0.0480754 |
| 10485117 | Creb3l1       | 0.227087167  | 0.587709999  | 0.074456278 | 0.278876949 | 0.000232574 | 0.005912207 | -0.360622832 | 0.407398583  | 0.885184305 | 0.386393234 | 0.0484124 |
| 10598093 | Gm9904        | 0.982212038  | 1.394112716  | 5.52E-006   | 0.000378821 | 1.07E-007   | 2.12E-005   | -0.411900678 | 1.188162377  | 0.34667036  | 0.704542772 | 0.0484235 |
| 10412646 |               | -0.046501282 | -0.360856598 | 0.658012282 | 0.837654708 | 0.003780589 | 0.044129223 | 0.314355316  | -0.20367894  | 1.543386449 | 0.128863605 | 0.0494748 |
| 10431625 | Syt10         | -0.226655595 | -0.554495117 | 0.054104674 | 0.232506074 | 0.000175658 | 0.004781312 | 0.327839523  | -0.390575356 | 0.839375853 | 0.408760308 | 0.0495465 |
| 10373452 | Gm129         | -0.1971475   | -0.601921055 | 0.160591877 | 0.420062398 | 0.000547425 | 0.01092335  | 0.404773555  | -0.399534278 | 1.013113462 | 0.327530493 | 0.0499698 |
| 10580635 | Ces3          | -0.683016615 | -1.103408629 | 0.00263859  | 0.006379068 | 2.20E-006   | 0.000200543 | 0.420392014  | -0.893212622 | 0.470651672 | 0.619006648 | 0.0506127 |
| 10601578 |               | -0.114171918 | -0.4374161   | 0.302084768 | 0.581034981 | 0.001205142 | 0.019455082 | 0.323244182  | -0.275794009 | 1.172049325 | 0.261014439 | 0.0507807 |
| 10468877 |               | 0.166158791  | 0.491081291  | 0.143844664 | 0.397919497 | 0.000496219 | 0.010222269 | -0.324922501 | 0.328620041  | 0.988748281 | 0.338352924 | 0.0508553 |
| 10436600 |               | -0.277898055 | -0.761105874 | 0.103795611 | 0.334659685 | 0.000349449 | 0.007881945 | 0.483207819  | -0.519501964 | 0.930136655 | 0.365124044 | 0.0508636 |
| 10461906 |               | -0.053850178 | -0.382351681 | 0.627796235 | 0.820023091 | 0.003706941 | 0.043506975 | 0.328501503  | -0.21810093  | 1.506190294 | 0.140839391 | 0.0516516 |
| 10439514 | Gap43         | -0.25704478  | -0.601909096 | 0.041874018 | 0.200265006 | 0.00014627  | 0.004190255 | 0.344864316  | -0.429476938 | 0.802986809 | 0.42704917  | 0.0518018 |
| 10531972 | 5830443L24Rik | 0.556961411  | 1.000718146  | 0.002216819 | 0.029590781 | 1.20E-005   | 0.00065904  | -0.443756735 | 0.778839778  | 0.569766398 | 0.556561718 | 0.0520453 |
| 10519913 | Magi2         | -0.087323183 | -0.421943455 | 0.444588887 | 0.698818589 | 0.002154129 | 0.029536427 | -0.254633319 | 1.314126027  | 0.206954705 | 0.0521858   | 0.0521858 |
| 10565994 | Art2b         | 0.387733817  | 0.82695601   | 0.01965874  | 0.126593208 | 7.57E-005   | 0.002549714 | -0.439222193 | 0.607344914  | 0.723184114 | 0.468868733 | 0.0528671 |
| 10381649 | Higd1b        | -0.236842512 | -0.558893971 | 0.045405081 | 0.210143821 | 0.000163093 | 0.004530606 | 0.322051458  | -0.397868242 | 0.809442486 | 0.423770026 | 0.053072  |
| 10427606 | Skp2          | 0.22384638   | 0.540176996  | 0.053088495 | 0.229877315 | 0.00019015  | 0.005078841 | -0.316330616 | 0.382011688  | 0.828065281 | 0.414394507 | 0.0532421 |
| 10384824 | Ncrna00117    | 0.121968736  | 0.488544994  | 0.336686112 | 0.611178155 | 0.001513932 | 0.022885524 | -0.366576258 | 0.305256865  | 1.200878013 | 0.24965712  | 0.0537606 |
| 10403743 | Inhba         | 0.555042715  | 1.007301702  | 0.002801549 | 0.034753541 | 1.52E-005   | 0.000778102 | -0.452258986 | 0.781172209  | 0.57894915  | 0.551019337 | 0.054194  |
| 10472050 | Tnfaip6       | 0.366089644  | 0.700476777  | 0.006241223 | 0.060202441 | 3.02E-005   | 0.001274448 | -0.334387133 | 0.53328321   | 0.627034803 | 0.522629238 | 0.0555135 |
| 10455961 | ligp1         | 0.810652389  | 1.299976865  | 0.000279043 | 0.006650396 | 2.56E-006   | 0.000223835 | -0.489324476 | 1.055314627  | 0.46367639  | 0.623589858 | 0.0559441 |
| 10518781 | Per3          | -0.115751026 | -0.492597714 | 0.378958617 | 0.647169945 | 0.001898318 | 0.026965154 | 0.376846689  | -0.30417437  | 1.238916641 | 0.234980842 | 0.0560776 |
| 10423894 | Tm7sf4        | 0.205635915  | 0.552964946  | 0.103066587 | 0.333246532 | 0.000400775 | 0.0087699   | -0.347329031 | 0.37930043   | 0.915709563 | 0.371878753 | 0.0563904 |
| 10531987 | Gbp4          | 0.193364838  | 0.538110732  | 0.122848228 | 0.366020699 | 0.000500716 | 0.01026547  | -0.344745894 | 0.365737785  | 0.942603986 | 0.359340237 | 0.0578133 |
| 10409278 | Nfil3         | 1.099380752  | 1.562607833  | 9.41E-006   | 0.000555348 | 1.90E-007   | 3.32E-005   | -0.46322708  | 1.330994293  | 0.348030854 | 0.703555127 | 0.0578228 |
| 10350341 |               | -0.270409812 | -0.636927367 | 0.04935365  | 0.220245579 | 0.000200005 | 0.005281616 | 0.366517554  | -0.45366859  | 0.807897136 | 0.424553609 | 0.0581553 |
| 10607116 | Ammecr1       | 0.464431144  | 0.83412701   | 0.002709456 | 0.034010259 | 1.62E-005   | 0.000810182 | -0.369695865 | 0.649279077  | 0.569394392 | 0.556787083 | 0.0581677 |
| 10358635 | Hmnc1         | -0.176422771 | -0.52481782  | 0.162667297 | 0.42316248  | 0.000708303 | 0.013203131 | 0.348395049  | -0.350620296 | 0.9936534   | 0.336160024 | 0.0592405 |
| 10571747 |               | -0.245907969 | -0.60377679  | 0.065848115 | 0.260493434 | 0.000272089 | 0.006594888 | 0.35786882   | -0.424842379 | 0.842356669 | 0.407282912 | 0.0592799 |
| 10578138 | Dctn6         | -0.078638512 | -0.428820205 | 0.523213982 | 0.754995306 | 0.003355222 | 0.04061371  | 0.350181693  | -0.253729359 | 1.380138643 | 0.183383412 | 0.0593098 |
| 10536216 | Gng11         | -0.347749529 | -0.665522972 | 0.007112149 | 0.065824131 | 3.72E-005   | 0.001491249 | 0.317773443  | -0.506636251 | 0.627222079 | 0.5225207   | 0.0599969 |
| 10361366 | Mtrf11        | -0.074525105 | -0.402151027 | 0.520494264 | 0.753201032 | 0.003444732 | 0.041414226 | 0.327625923  | -0.238338066 | 1.374626925 | 0.185316211 | 0.0606975 |
| 10358561 | Hmnc1         | -0.623339269 | -1.007466008 | 0.000406783 | 0.008829746 | 3.78E-006   | 0.000292666 | 0.384126739  | -0.815402638 | 0.471088418 | 0.618719901 | 0.0609757 |
| 10488804 | Gm14214       | -0.108555545 | -0.564227165 | 0.503664476 | 0.741330338 | 0.003372953 | 0.040781121 | 0.45567162   | -0.336391355 | 1.354587782 | 0.192396878 | 0.0619783 |
| 10595109 | Lrrc1         | -0.082392624 | -0.517567549 | 0.594645432 | 0.800176091 | 0.004483778 | 0.049479626 | 0.435174925  | -0.299980087 | 1.450679375 | 0.159192021 | 0.0624453 |
| 10494085 | Senlenp2      | -0.420203124 | -0.724182543 | 0.001558086 | 0.02283126  | 1.13E-005   | 0.000634406 | 0.30397942   | -0.572192833 | 0.531253455 | 0.580244756 | 0.062583  |
| 10454601 | Tslp          | -0.281601328 | -0.613739321 | 0.030659616 | 0.165782815 | 0.00014664  | 0.004196174 | 0.332137993  | -0.447670324 | 0.741925419 | 0.458828884 | 0.0643    |
| 10435704 | Cd80          | 0.251709226  | 0.569475628  | 0.041507302 | 0.199253679 | 0.000196078 | 0.005193932 | -0.317766402 | 0.410592427  | 0.773921732 | 0.442001753 | 0.0646307 |

Suppl Table 1

|          |               |              |              |             |             |             |             |              |              |             |             |           |
|----------|---------------|--------------|--------------|-------------|-------------|-------------|-------------|--------------|--------------|-------------|-------------|-----------|
| 10503376 | Gm11818       | -0.308370427 | -0.600701929 | 0.010200563 | 0.083597721 | 5.65E-005   | 0.002068608 | 0.292331502  | -0.454536178 | 0.64314243  | 0.513350152 | 0.0654558 |
| 10438053 | Dppa2         | -0.130523057 | -0.531193789 | 0.371586919 | 0.641350662 | 0.002339426 | 0.031359263 | 0.400670732  | -0.330858423 | 1.211003572 | 0.245716459 | 0.065736  |
| 10354370 |               | 0.13732318   | 0.42251138   | 0.194563586 | 0.462998829 | 0.001016451 | 0.017221305 | -0.2851882   | 0.27991728   | 1.01883028  | 0.325016523 | 0.0657857 |
| 10551791 | Zfp420        | -0.090799089 | -0.41740413  | 0.044435234 | 0.698705431 | 0.003060777 | 0.038100885 | 0.326605041  | -0.25410161  | 1.285332436 | 0.2175328   | 0.0660639 |
| 10358595 | Hmcn1         | -0.559574169 | -0.880584046 | 0.000267687 | 0.006445571 | 2.99E-006   | 0.000253133 | 0.321009877  | -0.720079107 | 0.445798071 | 0.635457991 | 0.066365  |
| 10416700 | Pcdh17        | -0.126664287 | -0.429644522 | 0.257867044 | 0.534733501 | 0.001463699 | 0.02234992  | 0.302980235  | -0.278154404 | 1.089251976 | 0.294811828 | 0.0666191 |
| 10395466 | Dock4         | -0.128363649 | -0.420684347 | 0.238974671 | 0.514123029 | 0.001380794 | 0.021589501 | 0.292320697  | -0.274523998 | 1.064827481 | 0.305130558 | 0.0683204 |
| 10406941 | Sgtb          | -0.310551984 | -0.635630431 | 0.018980002 | 0.123964046 | 0.000104533 | 0.003232725 | 0.325078447  | -0.473091207 | 0.687136945 | 0.488573185 | 0.0690693 |
| 10385500 | Irgm1         | 0.13053367   | 0.560229798  | 0.4101417   | 0.672384056 | 0.002907056 | 0.036685505 | -0.429696128 | 0.345381734  | 1.244119436 | 0.233000227 | 0.069095  |
| 10477495 | U46068        | 0.862615976  | 1.445210307  | 0.001153432 | 0.018653282 | 1.01E-005   | 0.000589577 | -0.582594331 | 1.153913142  | 0.504885775 | 0.596879203 | 0.0695522 |
| 10485170 | Cry2          | -0.162893893 | -0.526096067 | 0.234162559 | 0.509061113 | 0.001421125 | 0.022080771 | 0.363202174  | -0.34449498  | 1.054303239 | 0.309627659 | 0.070846  |
| 10502156 | Ccdc109b      | 0.134422351  | 0.437196502  | 0.238934372 | 0.514115038 | 0.00146203  | 0.022341715 | -0.302774151 | 0.285809427  | 1.059356768 | 0.30746438  | 0.0709988 |
| 10529937 | Kcnp4         | -0.303144645 | -0.605401199 | 0.015771204 | 0.110243807 | 9.43E-005   | 0.002988605 | 0.302256553  | -0.454272922 | 0.66536335  | 0.500733474 | 0.0723176 |
| 10569020 | Ifitm6        | -0.109829342 | -0.457679592 | 0.399213755 | 0.66314782  | 0.003022172 | 0.037737395 | 0.34785025   | -0.283754467 | 1.225884669 | 0.239969934 | 0.0727503 |
| 10549222 | Bcat1         | 0.241653623  | 0.526105124  | 0.035906971 | 0.182254325 | 0.00020418  | 0.005331533 | -0.284451502 | 0.383879374  | 0.740991887 | 0.459325735 | 0.0734381 |
| 10503602 | Fbxl4         | -0.075800841 | -0.354230895 | 0.468458174 | 0.716793852 | 0.00396979  | 0.04546033  | 0.278430054  | -0.215015868 | 1.294927935 | 0.213987097 | 0.074357  |
| 10469816 | Il1rn         | 0.913083844  | 1.355729098  | 7.86E-005   | 0.002678353 | 1.30E-006   | 0.000138095 | -0.442645254 | 1.134406471  | 0.390199867 | 0.673500218 | 0.0748968 |
| 10479726 | Pcmdt2        | -0.089837479 | -0.388978252 | 0.42618609  | 0.684276299 | 0.003492539 | 0.041771998 | 0.299140773  | -0.239407866 | 1.249502693 | 0.230957589 | 0.0751009 |
| 10369023 | Fam162b       | -0.469770048 | -0.79139977  | 0.001555447 | 0.022814408 | 1.43E-005   | 0.000742515 | 0.321629722  | -0.630584909 | 0.510049825 | 0.593593864 | 0.0759968 |
| 10516229 | Utp11l        | 0.192184259  | 0.486745109  | 0.10156399  | 0.331030174 | 0.000635181 | 0.012167039 | -0.29456085  | 0.339464684  | 0.867721631 | 0.394835522 | 0.0784978 |
| 10358623 | Hmcn1         | -0.591290478 | -1.074632239 | 0.005738523 | 0.056805692 | 4.41E-005   | 0.001714524 | 0.48334176   | -0.832961359 | 0.580269127 | 0.550225889 | 0.0788479 |
| 10427471 | Gucy1         | 0.094802505  | 0.399921227  | 0.417716372 | 0.678089035 | 0.003671107 | 0.043204941 | -0.305118722 | 0.247361866  | 1.233491349 | 0.237052946 | 0.0791016 |
| 10498935 | Osmr1b3       | -0.521939878 | -0.833801025 | 0.000604462 | 0.011821953 | 7.10E-006   | 0.000453252 | 0.311861147  | -0.677870452 | 0.460060099 | 0.625976536 | 0.0802878 |
| 10603887 | Zfp300        | -0.147325969 | -0.50809086  | 0.294663406 | 0.574153114 | 0.002341603 | 0.031369658 | 0.360764892  | -0.327708415 | 1.100871616 | 0.289959887 | 0.0810984 |
| 10359571 | Fmo1          | -0.867580068 | -1.228297685 | 2.20E-005   | 0.001044354 | 5.15E-007   | 7.03E-005   | 0.360717617  | -1.047938877 | 0.344216275 | 0.706327203 | 0.0812328 |
| 10358557 | Hmcn1         | -0.350691402 | -0.654289155 | 0.008928352 | 0.076365523 | 6.87E-005   | 0.002374475 | 0.303597753  | -0.502490279 | 0.604186321 | 0.535988407 | 0.0827977 |
| 10587776 |               | -0.103766367 | -0.426615493 | 0.411080132 | 0.673229473 | 0.003957388 | 0.045428554 | 0.322849126  | -0.26519093  | 1.217421446 | 0.243231596 | 0.084335  |
| 10351667 | Slamf1        | 0.217142704  | 0.525961115  | 0.085997812 | 0.301594504 | 0.000593183 | 0.011602855 | -0.308818411 | 0.371551909  | 0.831158187 | 0.412849349 | 0.0844319 |
| 10466104 | Ccdc86        | 0.196485067  | 0.489031217  | 0.009522632 | 0.027422062 | 0.000693708 | 0.012997149 | -0.292546149 | 0.342758142  | 0.853506054 | 0.401784305 | 0.08455   |
| 10497613 | Gm10258       | -0.27955426  | -0.58080412  | 0.02916126  | 0.161108745 | 0.000204862 | 0.005343912 | 0.301249859  | -0.43017919  | 0.700289243 | 0.481322792 | 0.0845724 |
| 10455970 | BC023105      | 1.045390576  | 1.796038755  | 0.002776761 | 0.034601226 | 2.63E-005   | 0.00115061  | -0.750648179 | 1.420714666  | 0.528359563 | 0.582053462 | 0.0845937 |
| 10358650 | Hmcn1         | -0.56754527  | -0.843623286 | 0.000115385 | 0.003495865 | 2.01E-006   | 0.000186644 | 0.276078017  | -0.705584278 | 0.391275749 | 0.672747278 | 0.0849214 |
| 10534935 | Pilrb1        | -0.160909255 | -0.474087116 | 0.198548488 | 0.468141715 | 0.001526405 | 0.02302449  | 0.313177861  | -0.317498186 | 0.986392599 | 0.339408623 | 0.0849399 |
| 10345089 |               | -0.22322588  | -0.525813492 | 0.074554387 | 0.279162947 | 0.000524876 | 0.010591603 | 0.302587612  | -0.374519686 | 0.807935132 | 0.424534333 | 0.0859228 |
| 10403031 | V165-D-J-C mu | 0.182516652  | 0.526639457  | 0.187697818 | 0.454898273 | 0.001468013 | 0.022375858 | -0.344122805 | 0.354578054  | 0.970513545 | 0.34656851  | 0.0865415 |
| 10603109 | Piga          | 0.199069457  | 0.570114838  | 0.183232154 | 0.449594009 | 0.001430831 | 0.022191285 | -0.371045381 | 0.384592147  | 0.964776281 | 0.349174312 | 0.086713  |
| 10558694 | Scgb1c1       | -0.899047387 | -1.323539198 | 9.28E-005   | 0.002978095 | 1.73E-006   | 0.000169011 | 0.424491811  | -1.111293292 | 0.381979999 | 0.679275225 | 0.0867427 |
| 10357345 | E030049G20Rik | -0.388508767 | -0.729804421 | 0.010581457 | 0.085272218 | 8.50E-005   | 0.002783083 | 0.341295654  | -0.559156594 | 0.610375801 | 0.532346415 | 0.0868248 |
| 10514732 | Slc35d1       | 0.10026437   | 0.421259244  | 0.42888973  | 0.686930088 | 0.004449584 | 0.049324266 | -0.320994874 | 0.260761807  | 1.230988841 | 0.238011085 | 0.0873376 |
| 10587226 | Lysmd2        | -0.393601025 | -0.734358953 | 0.010056359 | 0.082706381 | 8.34E-005   | 0.002740733 | 0.340757928  | -0.563979989 | 0.604202161 | 0.535979065 | 0.088459  |
| 10439974 | Gm8900        | 0.115061431  | 0.44676025   | 0.383560798 | 0.651108401 | 0.003883716 | 0.045021032 | -0.331698819 | 0.28091084   | 1.180797504 | 0.257546259 | 0.0889165 |
| 10449652 | Dnahc8        | -0.133598139 | -0.437148479 | 0.273479481 | 0.551448437 | 0.002453996 | 0.03257966  | 0.30355034   | -0.285373309 | 1.063695626 | 0.305612727 | 0.0891182 |
| 10408689 | Nrn1          | -0.460352383 | -0.742363742 | 0.000967742 | 0.016548968 | 1.19E-005   | 0.000651632 | 0.282011359  | -0.601358063 | 0.468957475 | 0.620117009 | 0.0895572 |
| 10524060 | Gm10417       | -0.250977201 | -0.612299244 | 0.095915246 | 0.321361774 | 0.00074035  | 0.013607982 | 0.361322043  | -0.431638222 | 0.837094642 | 0.409893043 | 0.096797  |
| 10358519 | Hmcn1         | -0.627378603 | -0.916886312 | 9.00E-005   | 0.002919689 | 1.81E-006   | 0.0001735   | 0.289507709  | -0.772132457 | 0.374945653 | 0.684249067 | 0.0923743 |
| 10594840 | Gcom1         | -0.50416767  | -0.823475786 | 0.001393695 | 0.021142656 | 1.69E-005   | 0.000831677 | 0.319308117  | -0.663821728 | 0.481014862 | 0.612243466 | 0.0935539 |
| 10545101 | Hpgds         | 0.510522244  | 0.844539322  | 0.00178879  | 0.025241702 | 2.08E-005   | 0.000971017 | -0.334017079 | 0.677530783  | 0.492991739 | 0.604497896 | 0.0937706 |
| 10358551 | Hmcn1         | -0.605876611 | -0.994942083 | 0.001586314 | 0.023121816 | 1.90E-005   | 0.000910672 | 0.389065472  | -0.800409347 | 0.48608312  | 0.608956663 | 0.0945298 |
| 10474411 | Lin7c         | -0.102947279 | -0.385788464 | 0.370702751 | 0.640840397 | 0.004089235 | 0.046402511 | 0.282841184  | -0.244367872 | 1.157440143 | 0.266849035 | 0.0948232 |
| 10363860 | Slc16a9       | -0.247763886 | -0.543567857 | 0.053652579 | 0.231124825 | 0.000447265 | 0.009503633 | 0.295803971  | -0.395665872 | 0.747610527 | 0.455810407 | 0.0965898 |
| 10476526 | 2210009G21Rik | 0.301000295  | 0.571486806  | 0.014547669 | 0.104805944 | 0.000131229 | 0.00386726  | -0.270486511 | 0.436243551  | 0.620035552 | 0.526696841 | 0.0968497 |
| 10519855 | Cacna2d1      | -0.31326053  | -0.629827875 | 0.026449039 | 0.15256161  | 0.000227787 | 0.005845972 | 0.316567345  | -0.471544202 | 0.671341825 | 0.497374826 | 0.097085  |
| 10381697 | Hexim1        | -0.221100957 | -0.475736792 | 0.047771469 | 0.216642766 | 0.000410681 | 0.008918246 | 0.254635835  | -0.348418875 | 0.730832493 | 0.464754799 | 0.0985509 |
| 10574426 | Ccl17         | 0.475720036  | 0.754417127  | 0.000899571 | 0.015782772 | 1.28E-005   | 0.000693984 | -0.27869709  | 0.615068581  | 0.453115471 | 0.630579582 | 0.100053  |
| 10435789 | Zbtb20        | -0.285276048 | -0.5432804   | 0.015941028 | 0.110947482 | 0.000149312 | 0.004253652 | 0.258004352  | -0.414278224 | 0.622780385 | 0.525099098 | 0.100086  |
| 10539933 | Txnrd3        | -0.113592528 | -0.401379135 | 0.341322434 | 0.615477367 | 0.003970679 | 0.04546033  | 0.287786607  | -0.257485832 | 1.117679388 | 0.283005564 | 0.10021   |

Suppl Table 1

|          |               |              |              |              |             |             |             |              |              |             |             |          |
|----------|---------------|--------------|--------------|--------------|-------------|-------------|-------------|--------------|--------------|-------------|-------------|----------|
| 10449661 | Tff2          | 0.208999984  | 0.599844836  | 0.204456105  | 0.475446576 | 0.002055969 | 0.02863408  | -0.390844852 | 0.40442241   | 0.966427287 | 0.348423411 | 0.100704 |
| 10358581 | Hmcn1         | -0.553068688 | -0.885058561 | 0.001107877  | 0.018112728 | 1.53E-005   | 0.000781064 | 0.331989873  | -0.719063624 | 0.461697494 | 0.624895021 | 0.100708 |
| 10544768 | Hoxa5         | -0.26491608  | -0.526508785 | 0.025160815  | 0.148120031 | 0.000229926 | 0.005870219 | 0.261592705  | -0.395712433 | 0.661067694 | 0.503156049 | 0.100918 |
| 10605659 | Gm14781       | 0.226367376  | 0.486458924  | 0.049502674  | 0.220711243 | 0.00044771  | 0.009505219 | -0.260091548 | 0.35641315   | 0.729747339 | 0.465337082 | 0.101999 |
| 10478145 | Ppp1r16b      | -0.135744326 | -0.434061974 | 0.278341549  | 0.55624968  | 0.003108812 | 0.038437859 | 0.298317647  | -0.28490315  | 1.047084411 | 0.312730289 | 0.102193 |
| 10578623 | Wwc2          | -0.397963107 | -0.676676674 | 0.003603036  | 0.041176642 | 4.23E-005   | 0.001658786 | 0.278713567  | -0.53731989  | 0.518710683 | 0.58811412  | 0.103013 |
| 10598594 |               | -0.200267067 | -0.475119503 | 0.095288672  | 0.320223833 | 0.000910763 | 0.015892223 | 0.274852436  | -0.337693285 | 0.813911463 | 0.421508833 | 0.10444  |
| 10580733 | Bbs2          | -0.187458094 | -0.439062317 | 0.089060168  | 0.307953764 | 0.000850879 | 0.015062315 | 0.251604224  | -0.313260206 | 0.803179654 | 0.426950996 | 0.104726 |
| 10380472 |               | -0.27210294  | -0.618414664 | 0.074646545  | 0.279376397 | 0.000706819 | 0.013185057 | 0.346311724  | -0.445258802 | 0.777776256 | 0.440000789 | 0.104732 |
| 10567448 | Dnahc3        | -0.507985128 | -0.981621398 | 0.020379857  | 0.129418647 | 0.00020133  | 0.005296804 | 0.47363627   | -0.744803263 | 0.635921315 | 0.517495981 | 0.105396 |
| 10348600 | Traf3ip1      | -0.134852707 | -0.403048095 | 0.238339642  | 0.513488496 | 0.002686668 | 0.034558889 | 0.268195388  | -0.268950401 | 0.997192745 | 0.334582171 | 0.105766 |
| 10503570 | Sfrs18        | -0.105310272 | -0.355576138 | 0.319998625  | 0.597618672 | 0.00396236  | 0.045431065 | 0.250265865  | -0.230443205 | 1.086019721 | 0.296167997 | 0.105867 |
| 10495285 | Sort1         | -0.270242452 | -0.560335542 | 0.039520609  | 0.19329554  | 0.000380551 | 0.008449813 | 0.290093091  | -0.415288997 | 0.698533052 | 0.482286829 | 0.106092 |
| 10409660 | Gkap1         | -0.291961694 | -0.577765675 | 0.026129737  | 0.151585128 | 0.00025625  | 0.006330534 | 0.285803981  | -0.434863685 | 0.657226601 | 0.505328901 | 0.106097 |
| 10423548 | Sdc2          | -0.4796144   | -0.773914092 | 0.001530882  | 0.022583147 | 2.17E-005   | 0.00100605  | 0.294299693  | -0.626764246 | 0.469554054 | 0.619725632 | 0.107015 |
| 10559649 | Cox6b2        | -0.152770346 | -0.440077903 | 0.0216706376 | 0.489425695 | 0.002459923 | 0.03259924  | 0.287307557  | -0.296424124 | 0.969244854 | 0.347143869 | 0.107868 |
| 10398996 | Crip2         | -0.143195631 | -0.439391209 | 0.261235365  | 0.538395607 | 0.003190892 | 0.039244764 | 0.296195578  | -0.29129342  | 1.016828934 | 0.32589553  | 0.109477 |
| 10350339 |               | -0.239485947 | -0.538727426 | 0.073929463  | 0.278039772 | 0.000750897 | 0.013767154 | 0.2929241479 | -0.389106687 | 0.769047384 | 0.444540105 | 0.109686 |
| 10458894 | Lox           | 0.433583059  | 0.723735283  | 0.003076965  | 0.036992756 | 4.05E-005   | 0.001599341 | -0.290152224 | 0.578659171  | 0.501421629 | 0.599090675 | 0.110138 |
| 10548367 | Clec1a        | -0.457640868 | -0.787832002 | 0.005113406  | 0.052401728 | 6.27E-005   | 0.002238385 | 0.330191134  | -0.622736435 | 0.530226137 | 0.580886365 | 0.110302 |
| 10413304 | Arf4          | 0.277520758  | 0.571267593  | 0.039741056  | 0.194030886 | 0.000409418 | 0.00898348  | -0.293746835 | 0.424394175  | 0.692155671 | 0.485798181 | 0.111005 |
| 10424287 | Frf16         | 0.626182214  | 0.98047156   | 0.000918303  | 0.015947901 | 1.50E-005   | 0.000767485 | -0.354289346 | 0.803326887  | 0.441027621 | 0.638654133 | 0.111851 |
| 10420596 | Tnfrsf19      | -0.111592245 | -0.361079023 | 0.300809357  | 0.580016118 | 0.003996572 | 0.045613167 | 0.249486778  | -0.236335634 | 1.055646046 | 0.309052142 | 0.112198 |
| 10356084 | Irs1          | -0.114030305 | -0.38205662  | 0.324279713  | 0.601085151 | 0.004434655 | 0.049191324 | 0.268026215  | -0.248043413 | 1.080561715 | 0.298464491 | 0.112337 |
| 10547820 | Lrrc23        | -0.224684364 | -0.606678002 | 0.180499552  | 0.445486779 | 0.002108148 | 0.029092445 | 0.381993638  | -0.415681183 | 0.918958216 | 0.370351921 | 0.112628 |
| 10459363 | Fam38b2       | -0.147988828 | -0.423163891 | 0.21889154   | 0.491988447 | 0.002686824 | 0.034558889 | 0.275175063  | -0.285576359 | 0.963577881 | 0.349719886 | 0.113157 |
| 10358625 | Hmcn1         | -0.584064989 | -0.862875095 | 0.00022867   | 0.00578846  | 4.88E-006   | 0.000341944 | 0.278810106  | -0.723470042 | 0.385378924 | 0.676882427 | 0.113414 |
| 10571467 | Pdgfrl        | 0.199180849  | 0.467624027  | 0.098729674  | 0.326555564 | 0.001082365 | 0.017981967 | -0.268443178 | 0.333402438  | 0.805162614 | 0.42594229  | 0.113935 |
| 10363743 | Rtkn2         | -0.723896276 | -1.037540253 | 0.000100844  | 0.003155689 | 2.56E-006   | 0.000223835 | 0.313643977  | -0.880718265 | 0.356122939 | 0.697704281 | 0.115798 |
| 10472860 | Rapgef4       | -0.56500292  | -0.84649165  | 0.000355743  | 0.007967895 | 7.19E-006   | 0.000456965 | 0.281488729  | -0.705747285 | 0.398852019 | 0.667464257 | 0.115975 |
| 10372595 |               | -0.240361553 | -0.605949391 | 0.141559219  | 0.394649943 | 0.00166572  | 0.024572241 | 0.365587839  | -0.423155472 | 0.863956306 | 0.396669353 | 0.116151 |
| 10380067 | Sept4         | -0.318647605 | -0.621184584 | 0.026386591  | 0.152405717 | 0.000297629 | 0.007041048 | 0.302536979  | -0.469916095 | 0.643810634 | 0.512967664 | 0.116671 |
| 10469536 |               | -0.247277081 | -0.519832324 | 0.05147727   | 0.226369465 | 0.00058461  | 0.011472304 | 0.272555242  | -0.383554703 | 0.710603313 | 0.475686236 | 0.118578 |
| 10590860 | 9030420J04Rik | -0.325244087 | -0.608660418 | 0.018081093  | 0.120359312 | 0.00021736  | 0.005624178 | 0.283416332  | -0.466952252 | 0.606949276 | 0.534360502 | 0.119779 |
| 10346114 |               | -0.304467422 | -0.59405127  | 0.027832786  | 0.156806837 | 0.000326082 | 0.007526872 | 0.289583849  | -0.449259346 | 0.644580577 | 0.512527179 | 0.119884 |
| 10455954 | Gm4951        | 0.276877706  | 0.711847749  | 0.158718048  | 0.417397654 | 0.002018466 | 0.028203579 | -0.434970043 | 0.494362728  | 0.879860107 | 0.388956356 | 0.120607 |
| 10347792 |               | -0.175099104 | -0.458390783 | 0.17090138   | 0.433523105 | 0.002218783 | 0.030286435 | 0.283291679  | -0.316744944 | 0.89438422  | 0.381986529 | 0.121178 |
| 10538408 | 2410066E13Rik | -0.210528752 | -0.456981546 | 0.066462815  | 0.261731747 | 0.000784705 | 0.014201021 | 0.246452794  | -0.333755149 | 0.738423946 | 0.460694209 | 0.121237 |
| 10358517 | Hmcn1         | -0.71520395  | -1.025901166 | 0.000125023  | 0.003705651 | 3.27E-006   | 0.000268903 | 0.310697215  | -0.870552558 | 0.356896562 | 0.69714703  | 0.122669 |
| 10496580 | Gbp3          | 0.263595892  | 0.574058516  | 0.069518936  | 0.268413367 | 0.000845697 | 0.014991259 | -0.310462624 | 0.418827204  | 0.741266616 | 0.459179482 | 0.12346  |
| 10415438 | Mcpt2         | 0.497901307  | 0.869519795  | 0.008191469  | 0.072278659 | 0.00011194  | 0.00340034  | -0.371618488 | 0.683710551  | 0.54353189  | 0.572616414 | 0.124179 |
| 10568078 | Taok2         | -0.244408678 | -0.501393027 | 0.045580474  | 0.210727596 | 0.000556121 | 0.01103984  | 0.256984349  | -0.372900852 | 0.689149267 | 0.487459268 | 0.124235 |
| 10389674 | Dynll2        | -0.23288439  | -0.547328233 | 0.108939013  | 0.342702073 | 0.001381937 | 0.021589501 | 0.314443843  | -0.390106311 | 0.80604654  | 0.425493107 | 0.124312 |
| 10582162 | Cott1         | 0.141413983  | 0.37975754   | 0.191429479  | 0.45935024  | 0.002652769 | 0.034268387 | -0.238343556 | 0.260585761  | 0.914645356 | 0.372379659 | 0.124444 |
| 10372177 | Tmtc2         | -0.361854588 | -0.613963375 | 0.00537815   | 0.054164887 | 7.76E-005   | 0.002594828 | 0.252108788  | -0.487908982 | 0.516712742 | 0.589374875 | 0.124563 |
| 10584325 | Vsig2         | -0.183428837 | -0.432475683 | 0.112154919  | 0.348117319 | 0.00145483  | 0.022341715 | 0.249046846  | -0.30795226  | 0.808719007 | 0.424136765 | 0.125831 |
| 10346191 | Stat1         | 0.385008529  | 0.693356424  | 0.01306158   | 0.097767625 | 0.000177556 | 0.00481767  | -0.308347895 | 0.539182476  | 0.571880409 | 0.55528227  | 0.127813 |
| 10360306 | Slamf8        | 0.138522225  | 0.412782422  | 0.266281383  | 0.543512585 | 0.004196    | 0.047300362 | -0.274260197 | 0.275652323  | 0.994949701 | 0.335581696 | 0.127849 |
| 10540472 | Bhlhe40       | 0.684161921  | 0.986315143  | 0.000166943  | 0.004627527 | 4.35E-006   | 0.000315693 | -0.302153222 | 0.835238532  | 0.361756805 | 0.693654483 | 0.127862 |
| 10516393 | Eif2c4        | -0.203512422 | -0.477477886 | 0.111692426  | 0.347463481 | 0.001493693 | 0.022684785 | 0.273965465  | -0.340495154 | 0.804608998 | 0.426223763 | 0.128302 |
| 10390103 | Pdk2          | -0.146913645 | -0.444543807 | 0.277759357  | 0.555562002 | 0.004477136 | 0.04944885  | 0.297630162  | -0.295728726 | 1.006429662 | 0.330481817 | 0.128596 |
| 10470628 | Ddx31         | 0.116050373  | 0.350451113  | 0.277023378  | 0.554819658 | 0.004489031 | 0.049516303 | -0.23440074  | 0.233250743  | 1.004930301 | 0.331145684 | 0.129083 |
| 10591628 | Dock6         | -0.211467727 | -0.480899888 | 0.095383983  | 0.320418279 | 0.001270818 | 0.020260477 | 0.269432161  | -0.346183807 | 0.77829221  | 0.439733368 | 0.129215 |
| 10551487 | Eid2b         | -0.130066934 | -0.369061827 | 0.234531858  | 0.509373098 | 0.003627788 | 0.042852306 | 0.238994893  | -0.249564381 | 0.957648251 | 0.352425867 | 0.129257 |
| 10456254 | Nedd4l        | -0.356453715 | -0.65297272  | 0.016647207  | 0.11419041  | 0.000228233 | 0.005845972 | 0.296519005  | -0.504713218 | 0.58749998  | 0.545893732 | 0.130301 |
| 10598403 | Praf2         | 0.292151399  | 0.555713773  | 0.025130831  | 0.148084981 | 0.00033699  | 0.0076956   | -0.263562374 | 0.423932586  | 0.62170822  | 0.525722797 | 0.130651 |

Suppl Table 1

|          |               |              |              |             |             |             |             |              |              |             |             |          |
|----------|---------------|--------------|--------------|-------------|-------------|-------------|-------------|--------------|--------------|-------------|-------------|----------|
| 10379630 | Slnf2         | 0.434348189  | 0.730518482  | 0.00526553  | 0.053336866 | 8.18E-005   | 0.002716106 | -0.296170292 | 0.582433335  | 0.50850505  | 0.594575223 | 0.130912 |
| 10605431 | Rab39b        | 0.157714921  | 0.470544418  | 0.271594038 | 0.549236288 | 0.004496099 | 0.049572972 | -0.312829497 | 0.314129669  | 0.995861033 | 0.335175416 | 0.131291 |
| 10360377 | Al607873      | 1.123884845  | 1.681615149  | 0.000510246 | 0.010435857 | 1.14E-005   | 0.000638289 | -0.557730304 | 1.402749997  | 0.397597794 | 0.668336537 | 0.131899 |
| 10502240 | Npnt          | -0.531472362 | -0.81281306  | 0.00086957  | 0.015393186 | 1.78E-005   | 0.000869097 | 0.281340699  | -0.672142711 | 0.418572863 | 0.653867891 | 0.132129 |
| 10498952 | Gucy1a3       | -0.452059763 | -0.693761615 | 0.000945099 | 0.016270149 | 1.91E-005   | 0.000910672 | 0.241701852  | -0.572910689 | 0.421883997 | 0.651606767 | 0.13231  |
| 10358553 | Hmcn1         | -0.571756787 | -0.860939999 | 0.000604296 | 0.011821953 | 1.32E-005   | 0.000707672 | 0.289183211  | -0.716348393 | 0.403690738 | 0.66410759  | 0.132371 |
| 10396112 | Atp5s         | -0.271260975 | -0.527343035 | 0.031823596 | 0.169400263 | 0.000432118 | 0.00927392  | 0.25608206   | -0.399302005 | 0.641324254 | 0.514391879 | 0.132575 |
| 10567460 | Dnahc3        | -0.180116485 | -0.421914788 | 0.114983124 | 0.352657048 | 0.001630383 | 0.024176007 | 0.241798302  | -0.301015636 | 0.80327489  | 0.426902518 | 0.132818 |
| 10349157 | Serpnb2       | 0.595301775  | 1.020235028  | 0.007316192 | 0.067212605 | 0.000112125 | 0.003400751 | -0.424933253 | 0.807768402  | 0.526058276 | 0.583494743 | 0.133249 |
| 10461365 | Eef1g         | 0.189016574  | 0.505875872  | 0.20053736  | 0.47076943  | 0.003162277 | 0.038986234 | -0.316859298 | 0.347446223  | 0.911966448 | 0.373642201 | 0.133945 |
| 10352396 | Trp53bp2      | -0.335638304 | -0.610996194 | 0.016723223 | 0.114589347 | 0.000243159 | 0.006065502 | 0.27535789   | -0.473317249 | 0.581761789 | 0.549329615 | 0.135533 |
| 10396161 | Tmx1          | 0.246816711  | 0.537511905  | 0.079286108 | 0.287445736 | 0.001142347 | 0.018688193 | -0.290695194 | 0.392164308  | 0.741258671 | 0.459183711 | 0.136864 |
| 10448235 | A630033E08Rik | -0.280867385 | -0.532040699 | 0.02627908  | 0.152063696 | 0.000378599 | 0.008414835 | 0.251173314  | -0.406454042 | 0.617962398 | 0.527905826 | 0.137117 |
| 10368730 | Bxdc1         | 0.51792215   | 0.780820984  | 0.000701257 | 0.013015078 | 1.57E-005   | 0.000794298 | -0.262898835 | 0.649371567  | 0.404851164 | 0.663304599 | 0.137586 |
| 10385504 | Gms431        | 0.444973168  | 0.933109093  | 0.063067446 | 0.253583953 | 0.000921021 | 0.016016786 | -0.488135925 | 0.68904113   | 0.708427848 | 0.476871537 | 0.138965 |
| 10542575 | Pde3a         | -0.611867245 | -0.879119483 | 0.000201965 | 0.00530012  | 5.66E-006   | 0.000381287 | 0.267252238  | -0.745493364 | 0.358490432 | 0.696000097 | 0.139309 |
| 10394749 | Nol10         | 0.247112059  | 0.591221402  | 0.133850786 | 0.383019171 | 0.002092584 | 0.028951239 | -0.344109343 | 0.419166731  | 0.820936676 | 0.417968731 | 0.139412 |
| 10459576 | Cep76         | 0.245215709  | 0.490932969  | 0.045025753 | 0.20910458  | 0.000663182 | 0.012516585 | -0.24571726  | 0.368074339  | 0.66757509  | 0.499489166 | 0.140512 |
| 10604505 | 6720401G13Rik | -0.174860267 | -0.415606326 | 0.130895529 | 0.378452679 | 0.002066206 | 0.028714339 | 0.240746059  | -0.295233297 | 0.815443453 | 0.420735336 | 0.140216 |
| 10569611 | Fadd          | 0.230806178  | 0.474764847  | 0.055865605 | 0.236674317 | 0.000829047 | 0.014817268 | -0.243958669 | 0.352785512  | 0.691521223 | 0.486148415 | 0.140673 |
| 10411958 | Rnf180        | 0.189246063  | 0.447012874  | 0.127417261 | 0.373013642 | 0.002010816 | 0.028142655 | -0.257766811 | 0.318129468  | 0.810257574 | 0.423357075 | 0.140809 |
| 10387985 | A430084P05Rik | 0.482579857  | 0.810532826  | 0.006224954 | 0.060136291 | 0.00106139  | 0.003266637 | -0.327952969 | 0.646556341  | 0.507230303 | 0.595385975 | 0.141576 |
| 10511180 | Mxra8         | -0.19176106  | -0.505480473 | 0.199290136 | 0.469171715 | 0.003439939 | 0.041390633 | 0.313719413  | -0.348620767 | 0.899887336 | 0.379363933 | 0.141683 |
| 10384782 | Vrk2          | 0.299378455  | 0.540609691  | 0.016746508 | 0.114605795 | 0.000261718 | 0.006422347 | -0.241231236 | 0.419994073  | 0.574368191 | 0.553779298 | 0.142153 |
| 10519527 | Abcb1a        | -0.326186479 | -0.627939117 | 0.033328976 | 0.174527019 | 0.000511843 | 0.01044314  | 0.301752639  | -0.477062798 | 0.63252184  | 0.519455581 | 0.143641 |
| 10366153 | Rassf9        | -0.522264732 | -0.745624095 | 0.000189749 | 0.005068122 | 5.62E-006   | 0.000380896 | 0.223359363  | -0.633944414 | 0.352332726 | 0.70043972  | 0.144485 |
| 10567428 | Dnahc3        | -0.299008332 | -0.539035486 | 0.01706501  | 0.11594089  | 0.000274145 | 0.006632188 | 0.240027154  | -0.419021909 | 0.572827218 | 0.554709921 | 0.144866 |
| 10434806 | Lpp           | 0.218415646  | 0.549387946  | 0.171424178 | 0.434107715 | 0.002973917 | 0.037309138 | -0.3309723   | 0.383901796  | 0.862127512 | 0.397561773 | 0.144875 |
| 10360406 | Ifi205        | 0.468325385  | 0.840970176  | 0.016320125 | 0.11260886  | 0.000263318 | 0.006449828 | -0.372644791 | 0.654647781  | 0.569229441 | 0.556887032 | 0.144983 |
| 10460968 | Rasgrp2       | -0.404374944 | -0.662025763 | 0.004466614 | 0.047452268 | 8.31E-005   | 0.002735545 | 0.257650819  | -0.533200353 | 0.48321577  | 0.610814512 | 0.146334 |
| 10577114 | Grtp1         | -0.267702436 | -0.521153598 | 0.03812315  | 0.189407899 | 0.000602122 | 0.011673172 | 0.253451162  | -0.394428017 | 0.642579003 | 0.513672816 | 0.146457 |
| 10358652 | Hmcn1         | -0.535146948 | -0.780059393 | 0.000364679 | 0.008125507 | 9.89E-006   | 0.000582473 | 0.244912445  | -0.657603171 | 0.372431972 | 0.686033592 | 0.14649  |
| 10552369 | Siglec5       | 0.198857697  | 0.456667062  | 0.117363553 | 0.356760739 | 0.001991097 | 0.027900148 | -0.257800365 | 0.327762379  | 0.786573996 | 0.435454434 | 0.148144 |
| 10352914 | A330023F24Rik | -0.463742176 | -0.71664025  | 0.001584572 | 0.023109549 | 3.50E-005   | 0.001423598 | 0.252898074  | -0.590191213 | 0.42850193  | 0.647105959 | 0.149564 |
| 10472097 | Fmnl2         | 0.255438756  | 0.491020282  | 0.036002225 | 0.182388782 | 0.000599263 | 0.011653428 | -0.235581526 | 0.373229519  | 0.631197464 | 0.520220377 | 0.151319 |
| 10401841 | Dio2          | 0.199197239  | 0.485706804  | 0.158539    | 0.417150943 | 0.002936997 | 0.036954328 | -0.286509565 | 0.342452022  | 0.836641475 | 0.410118281 | 0.152085 |
| 10497501 | Naaladl2      | -0.386421832 | -0.660639069 | 0.009693086 | 0.080990279 | 0.000176648 | 0.00479811  | 0.274217237  | -0.523530451 | 0.523784694 | 0.584921253 | 0.152706 |
| 10462406 | C030046E11Rik | 0.19056281   | 0.433852278  | 0.11640945  | 0.355671677 | 0.002076792 | 0.028814645 | -0.243289468 | 0.312207544  | 0.77925557  | 0.43923432  | 0.152847 |
| 10472538 | Dhrs9         | 0.183754483  | 0.410392094  | 0.105602984 | 0.337435253 | 0.001871653 | 0.026734324 | -0.226637612 | 0.297073288  | 0.762901347 | 0.447753466 | 0.153267 |
| 10358617 | Hmcn1         | -0.548182032 | -0.85937533  | 0.002309735 | 0.030540135 | 5.03E-005   | 0.001895871 | 0.311193297  | -0.703778681 | 0.442174941 | 0.637884302 | 0.153772 |
| 10544932 | Inmt          | -0.764892657 | -1.073035942 | 0.000141469 | 0.004057239 | 4.80E-006   | 0.000337825 | 0.308143285  | -0.9189643   | 0.335315838 | 0.712830417 | 0.154801 |
| 10526566 | Ephb4         | -0.167713576 | -0.40830919  | 0.160682618 | 0.42013028  | 0.003085511 | 0.038297344 | 0.240595615  | -0.288011383 | 0.835368423 | 0.41075141  | 0.155188 |
| 10591618 | Dock6         | -0.295644251 | -0.525109951 | 0.016644884 | 0.11419041  | 0.000299464 | 0.007066598 | 0.2294657    | -0.410377101 | 0.55915815  | 0.563013994 | 0.155748 |
| 10513536 | Gm2173        | -0.237430034 | -0.50122542  | 0.078844143 | 0.286860969 | 0.001432236 | 0.022192448 | 0.263795386  | -0.369327727 | 0.714258278 | 0.473699107 | 0.157981 |
| 10473244 | Zfp804a       | -0.153399695 | -0.37397528  | 0.164726849 | 0.426023385 | 0.003283534 | 0.04011507  | 0.220575584  | -0.263687488 | 0.836503796 | 0.410186726 | 0.158273 |
| 10346810 | Pard3b        | -0.327985509 | -0.540342723 | 0.006103631 | 0.059276583 | 0.000123371 | 0.003677904 | 0.212357214  | -0.434164116 | 0.489117379 | 0.606995329 | 0.158599 |
| 10424582 |               | -0.427423753 | -0.746082351 | 0.014177521 | 0.103061062 | 0.000268061 | 0.006534262 | 0.318658597  | -0.586753052 | 0.543088095 | 0.572890852 | 0.159671 |
| 10544089 | Zc3hav1       | 0.162907165  | 0.398890052  | 0.169704378 | 0.432305899 | 0.00347498  | 0.041660811 | -0.235982887 | 0.280898609  | 0.840099878 | 0.408401173 | 0.160297 |
| 10470283 | Egfl7         | -0.244303571 | -0.560588772 | 0.12783601  | 0.373723771 | 0.002499695 | 0.033022218 | 0.316285201  | -0.402446171 | 0.785906845 | 0.435798188 | 0.16037  |
| 10368356 | Akap7         | -0.173269279 | -0.408797364 | 0.145629021 | 0.400381872 | 0.00291246  | 0.036717597 | 0.235528085  | -0.291033321 | 0.809282194 | 0.423851263 | 0.160646 |
| 10397094 | Psen1         | 0.214848411  | 0.4333713    | 0.059098231 | 0.244053921 | 0.001088826 | 0.018065926 | -0.218522889 | 0.324109856  | 0.674224759 | 0.495760588 | 0.16076  |
| 10503251 | 2610301B20Rik | 0.17439126   | 0.423298658  | 0.166984732 | 0.429071907 | 0.003519052 | 0.041973531 | -0.248907397 | 0.298844959  | 0.832898096 | 0.411981605 | 0.163375 |
| 10358668 | Hmcn1         | -0.263764992 | -0.483100598 | 0.026096028 | 0.151511615 | 0.000497304 | 0.010236401 | 0.219335606  | -0.373432795 | 0.587349609 | 0.545983576 | 0.163905 |
| 10492888 |               | -0.299670654 | -0.595256975 | 0.057199319 | 0.239887276 | 0.001146853 | 0.018714197 | 0.293586321  | -0.447463814 | 0.660581508 | 0.50343073  | 0.169383 |
| 10527920 | Cyp51         | 0.543670669  | 0.819255129  | 0.001351716 | 0.020763525 | 3.65E-005   | 0.001473522 | -0.275584461 | 0.681462899  | 0.404401268 | 0.663615825 | 0.169687 |
| 10495675 | F3            | 0.510838127  | 0.754669435  | 0.000867912 | 0.015374447 | 2.52E-005   | 0.001120717 | -0.243831307 | 0.632753781  | 0.385349428 | 0.676903163 | 0.171023 |

Suppl Table 1

|          |               |              |              |             |             |             |             |               |              |             |             |          |
|----------|---------------|--------------|--------------|-------------|-------------|-------------|-------------|---------------|--------------|-------------|-------------|----------|
| 10351224 | F5            | 0.393759286  | 0.808653494  | 0.074038948 | 0.278166235 | 0.00153434  | 0.023109978 | -0.414894208  | 0.60120639   | 0.690102792 | 0.486932028 | 0.17152  |
| 10352133 | Efcab2        | -0.496331349 | -0.745450837 | 0.00131884  | 0.02040102  | 3.65E-005   | 0.001473522 | 0.249119488   | -0.620891093 | 0.401228962 | 0.665813658 | 0.172328 |
| 10522430 | Dcun1d4       | -0.218173377 | -0.429726141 | 0.05534052  | 0.235377015 | 0.001144765 | 0.018692009 | 0.211552764   | -0.323949759 | 0.653041894 | 0.507703293 | 0.172727 |
| 10476560 | Ism1          | -0.164845427 | -0.389634156 | 0.158899545 | 0.417562908 | 0.003661473 | 0.043131115 | 0.224788728   | -0.277239791 | 0.018089759 | 0.423077456 | 0.173208 |
| 10510391 | Srm           | 0.223461734  | 0.44903915   | 0.066077416 | 0.260947483 | 0.001416981 | 0.02203634  | -0.225577415  | 0.336250442  | 0.670861319 | 0.497644213 | 0.175753 |
| 10545168 | Tacstd2       | -0.3052425   | -0.59747769  | 0.054286363 | 0.233013775 | 0.001155789 | 0.018823724 | 0.292235191   | -0.451360095 | 0.647454646 | 0.510885184 | 0.175821 |
| 10491414 | Usp13         | -0.158358585 | -0.370831682 | 0.155620261 | 0.413590895 | 0.003680689 | 0.043278021 | 0.212473097   | -0.264595134 | 0.803012111 | 0.427036288 | 0.17628  |
| 10367746 | Sash1         | -0.247484293 | -0.479539331 | 0.050336432 | 0.222918486 | 0.001075426 | 0.017924703 | 0.232055038   | -0.363511812 | 0.638370006 | 0.516087581 | 0.176399 |
| 10380381 | Tob1          | -0.231704958 | -0.474936327 | 0.076348929 | 0.282543875 | 0.001664623 | 0.024572241 | 0.243231369   | -0.353320643 | 0.688415394 | 0.487865309 | 0.176603 |
| 10361507 | Fabp12        | -1.062219681 | -1.62960791  | 0.002279702 | 0.030256152 | 6.09E-005   | 0.00219663  | 0.56738823    | -1.345913795 | 0.421563574 | 0.65182531  | 0.176921 |
| 10420383 | AU040096      | -0.185691334 | -0.422061354 | 0.136675001 | 0.387600699 | 0.003183438 | 0.039190635 | 0.23637002    | -0.303876344 | 0.777849361 | 0.439962892 | 0.176927 |
| 10361651 | Nup43         | 0.635733507  | 0.887920574  | 0.000205251 | 0.005333121 | 7.79E-006   | 0.000487574 | -0.252187067  | 0.761827041  | 0.331029293 | 0.715980152 | 0.176973 |
| 10433885 | Cebpδ         | -0.217163033 | -0.421581092 | 0.051733233 | 0.22694829  | 0.001118928 | 0.018410664 | 0.204418059   | -0.319372063 | 0.640062433 | 0.515115684 | 0.177641 |
| 10522192 | Nsun7         | -0.353195893 | -0.61143009  | 0.016365393 | 0.112772805 | 0.000363695 | 0.008145997 | 0.258234197   | -0.482312992 | 0.535407922 | 0.5776554   | 0.177993 |
| 10572727 | Gm15468       | -0.274768288 | -0.552238894 | 0.067984184 | 0.265280943 | 0.001502779 | 0.022757131 | 0.277470606   | -0.413503591 | 0.671023449 | 0.497553307 | 0.178813 |
| 10497276 | Fabp12        | -0.418390934 | -0.64226047  | 0.002429674 | 0.031593141 | 6.60E-005   | 0.002317426 | 0.223869536   | -0.530325702 | 0.422135934 | 0.651434977 | 0.179818 |
| 10348645 | Gpr35         | 0.157851676  | 0.375542939  | 0.170136313 | 0.432692612 | 0.004249671 | 0.047737659 | -0.217691264  | 0.266697308  | 0.816248449 | 0.420329233 | 0.180237 |
| 10369655 | Stox1         | -0.217212311 | -0.420732989 | 0.052354751 | 0.228350338 | 0.001165953 | 0.018941576 | 0.203520678   | -0.31897265  | 0.638050559 | 0.516271167 | 0.180759 |
| 10346634 | Nop58         | 0.594082197  | 0.845307335  | 0.000396645 | 0.00864504  | 1.41E-005   | 0.000734425 | -0.251225139  | 0.719694766  | 0.349071788 | 0.702800238 | 0.18159  |
| 10403069 | Igh-6         | 0.658526597  | 0.95364729   | 0.000666365 | 0.012595177 | 2.22E-005   | 0.001022154 | -0.295120694  | 0.806086944  | 0.366115214 | 0.690534754 | 0.183249 |
| 10566767 | St5           | -0.204069081 | -0.415135256 | 0.07685633  | 0.283481575 | 0.001786649 | 0.025851018 | 0.211066175   | -0.309602169 | 0.681733516 | 0.491572513 | 0.183415 |
| 10413059 | Vcl           | -0.172501538 | -0.373123979 | 0.11401558  | 0.346941347 | 0.002687375 | 0.034558889 | 0.200622441   | -0.272812758 | 0.735385112 | 0.462316945 | 0.183619 |
| 10358621 | Hmcn1         | -0.287995592 | -0.574140711 | 0.067076263 | 0.263330537 | 0.001552934 | 0.023341029 | 0.28614512    | -0.431068152 | 0.663804827 | 0.501611514 | 0.183889 |
| 10405942 | Gm10037       | -0.216576913 | -0.499493781 | 0.152859939 | 0.410076183 | 0.003884573 | 0.045021032 | 0.282916868   | -0.358035347 | 0.790192561 | 0.433592812 | 0.184197 |
| 10483819 | Ttc30b        | -0.337253631 | -0.659078396 | 0.058203535 | 0.242134251 | 0.001347242 | 0.02120242  | 0.321824765   | -0.498166014 | 0.646019111 | 0.511704879 | 0.18459  |
| 10474700 | Thbs1         | 0.831585104  | 1.183937677  | 0.00043398  | 0.009275098 | 1.56E-005   | 0.00079147  | -0.3512352573 | 1.00776139   | 0.349638889 | 0.702389256 | 0.185112 |
| 10357391 | Zranb3        | 0.343680069  | 0.579559807  | 0.01282911  | 0.096596624 | 0.000309041 | 0.007237656 | -0.235879738  | 0.461619938  | 0.51098256  | 0.593001904 | 0.185397 |
| 10567462 | Dnahc3        | -0.524317252 | -0.831316851 | 0.005013102 | 0.051635753 | 0.000132256 | 0.003893057 | 0.306999599   | -0.677817051 | 0.452923984 | 0.630706873 | 0.186417 |
| 10452639 | Myl12b        | -0.191840666 | -0.448513287 | 0.164777365 | 0.426043945 | 0.00435968  | 0.048590648 | 0.256672621   | -0.320176976 | 0.801658582 | 0.427725714 | 0.187066 |
| 10580765 | Plp           | -0.411090603 | -0.652725837 | 0.005201385 | 0.052874909 | 0.000137556 | 0.004016822 | 0.241635233   | -0.53190822  | 0.454279938 | 0.629805931 | 0.187172 |
| 10437698 | Txndc11       | 0.165399303  | 0.377417046  | 0.151028588 | 0.40784738  | 0.004039187 | 0.045976873 | -0.212017743  | 0.271408175  | 0.781176703 | 0.438240151 | 0.189987 |
| 10461396 | LOC100045435  | 0.213917066  | 0.450190082  | 0.101792034 | 0.331253423 | 0.00263198  | 0.034102808 | -0.236273016  | 0.332053574  | 0.711550889 | 0.475170544 | 0.192386 |
| 10486396 | Ehd4          | -0.292298421 | -0.550574814 | 0.048001573 | 0.21711006  | 0.001220861 | 0.01965938  | 0.258276393   | -0.421436617 | 0.612847536 | 0.530896826 | 0.195887 |
| 10502949 |               | 0.900695093  | 1.469419393  | 0.009223071 | 0.078316068 | 0.00024887  | 0.006185172 | -0.5687243    | 1.185057243  | 0.479912936 | 0.612959851 | 0.196007 |
| 10522530 | Kit           | -0.483441793 | -0.718899348 | 0.001672116 | 0.024017841 | 5.47E-005   | 0.002021612 | 0.235457555   | -0.601170571 | 0.391665138 | 0.672474936 | 0.197532 |
| 10486061 | Rasgrp1       | 0.354612922  | 0.590734912  | 0.012836648 | 0.096596624 | 0.000343856 | 0.007780723 | -0.23612199   | 0.472673917  | 0.499545208 | 0.60029112  | 0.198028 |
| 10358637 | Hmcn2         | -0.460371836 | -0.671166125 | 0.001069586 | 0.017712346 | 3.75E-005   | 0.001501277 | 0.210794289   | -0.56576898  | 0.372580145 | 0.685928296 | 0.198904 |
| 10581266 | Tppp3         | -0.410056147 | -0.71476573  | 0.023663298 | 0.142112665 | 0.000633059 | 0.012135438 | 0.304709582   | -0.562410939 | 0.541791707 | 0.573693072 | 0.201433 |
| 10585048 | Cadm1         | -0.239395391 | -0.441901482 | 0.042590509 | 0.202160283 | 0.001137664 | 0.018632754 | 0.202506091   | -0.340648437 | 0.594472391 | 0.541739282 | 0.201894 |
| 10417510 | Gm10044       | -0.493916481 | -0.854135575 | 0.021958543 | 0.135716802 | 0.00059599  | 0.011630788 | 0.360219094   | -0.674026028 | 0.534429056 | 0.578264734 | 0.202893 |
| 10516640 | Eif3i         | 0.356770788  | 0.5592362    | 0.005337191 | 0.053871423 | 0.000160506 | 0.004482978 | -0.202465412  | 0.458003494  | 0.442060845 | 0.637960826 | 0.203545 |
| 10464342 | 6430537H07Rik | -0.170757538 | -0.376818594 | 0.140906483 | 0.393685382 | 0.004209771 | 0.047413956 | 0.206061055   | -0.273788066 | 0.752629792 | 0.453155819 | 0.203878 |
| 10580537 | Aktip         | -0.221751385 | -0.421325033 | 0.055702165 | 0.236285434 | 0.00152761  | 0.02302449  | 0.199573648   | -0.321538209 | 0.62068408  | 0.526319036 | 0.204193 |
| 10534531 | Ywhag         | 0.233167503  | 0.431832078  | 0.045879803 | 0.211350105 | 0.001275551 | 0.020310692 | -0.198664575  | 0.332499791  | 0.597487819 | 0.539949474 | 0.206653 |
| 10555576 | 3200002M19Rik | 0.198506078  | 0.399990403  | 0.086769026 | 0.30318882  | 0.002496275 | 0.033011019 | -0.201484325  | 0.29924824   | 0.673301621 | 0.496277101 | 0.206541 |
| 10502816 | Gipc2         | -0.354241601 | -0.592115005 | 0.015037005 | 0.107201694 | 0.000428223 | 0.009213437 | 0.237873404   | -0.473178303 | 0.502714099 | 0.59826486  | 0.20675  |
| 10403796 | Amph          | -0.363875157 | -0.608775391 | 0.015228959 | 0.108042266 | 0.000433523 | 0.00929275  | 0.244900234   | -0.486325274 | 0.503572911 | 0.5977166   | 0.206788 |
| 10566583 | Gm8995        | 0.27928155   | 0.52963281   | 0.056637747 | 0.23855886  | 0.001601208 | 0.023825978 | -0.25035126   | 0.40445718   | 0.618980876 | 0.527311649 | 0.207754 |
| 10421309 | Slc39a14      | 0.253074745  | 0.452344882  | 0.033503473 | 0.175146059 | 0.000945175 | 0.01632621  | -0.199270138  | 0.352709814  | 0.564969076 | 0.559472992 | 0.208628 |
| 10542369 | Gm8994        | -0.509247783 | -0.838648556 | 0.012641541 | 0.095633091 | 0.000370644 | 0.008272783 | 0.329400773   | -0.67394817  | 0.488762768 | 0.607224301 | 0.209154 |
| 10453049 | Cdc42ep3      | -0.339218523 | -0.576621515 | 0.019584744 | 0.126333176 | 0.00056866  | 0.01126262  | 0.237402292   | -0.457920019 | 0.51843768  | 0.588286274 | 0.21073  |
| 10369690 | Tet1          | -0.397956045 | -0.605265716 | 0.003394142 | 0.039654451 | 0.000113104 | 0.003420428 | 0.207309671   | -0.50161088  | 0.413287828 | 0.657489817 | 0.210982 |
| 10358654 | Hmcn1         | -0.260792797 | -0.519637079 | 0.084153594 | 0.298103016 | 0.002529126 | 0.033274012 | 0.258844282   | -0.390214938 | 0.663337706 | 0.501874881 | 0.212114 |
| 10433988 | Serpind1      | 0.429833672  | 0.666508933  | 0.00502279  | 0.051694058 | 0.000162593 | 0.004527073 | -0.236675261  | 0.548171302  | 0.431754198 | 0.644903092 | 0.212427 |
| 10539263 | Loxl3         | 0.202112685  | 0.390672857  | 0.068320291 | 0.26582465  | 0.002028302 | 0.028294808 | -0.188560172  | 0.296392771  | 0.636183436 | 0.517345093 | 0.212511 |
| 10471586 | Hspa5         | 0.337675299  | 0.539340541  | 0.008381961 | 0.07342254  | 0.000260262 | 0.00640096  | -0.201665243  | 0.43850792   | 0.459889624 | 0.62608922  | 0.212825 |

Suppl Table 1

|          |               |              |              |             |             |             |             |              |              |             |             |          |
|----------|---------------|--------------|--------------|-------------|-------------|-------------|-------------|--------------|--------------|-------------|-------------|----------|
| 10462281 | Vldlr         | -0.507080282 | -0.733918614 | 0.001166788 | 0.018800444 | 4.49E-005   | 0.001734584 | 0.226838332  | -0.620499448 | 0.365573786 | 0.69092168  | 0.213587 |
| 10363241 | Gcc2          | -0.238165115 | -0.460285431 | 0.069243127 | 0.267993453 | 0.002087475 | 0.02891598  | 0.222120316  | -0.349225273 | 0.636037347 | 0.517429184 | 0.214286 |
| 10567446 | Dnahc3        | -0.391536179 | -0.648540576 | 0.014668473 | 0.105465086 | 0.000444707 | 0.009457121 | 0.257004396  | -0.520038378 | 0.49420275  | 0.603718864 | 0.21453  |
| 10358559 | Hmcn1         | -0.428543158 | -0.635094782 | 0.002113776 | 0.028593681 | 7.68E-005   | 0.002576322 | 0.206551624  | -0.53181897  | 0.388387094 | 0.674770397 | 0.215554 |
| 10569494 | Tnfrsf22      | 0.319182783  | 0.583318829  | 0.044625926 | 0.2081516   | 0.001340793 | 0.021139723 | -0.264136045 | 0.451250806  | 0.585341991 | 0.547184091 | 0.216136 |
| 10372687 | Nup107        | 0.336650651  | 0.543277356  | 0.010348345 | 0.084396017 | 0.000325416 | 0.007525023 | -0.206626705 | 0.439964004  | 0.469644569 | 0.619666267 | 0.216513 |
| 10433034 | Atf7          | -0.174984089 | -0.375508912 | 0.133972872 | 0.383240352 | 0.004460057 | 0.049360654 | 0.200524823  | -0.275246501 | 0.728528147 | 0.465991841 | 0.217814 |
| 10476326 | Cds2          | -0.406314516 | -0.613294381 | 0.003297613 | 0.038880634 | 0.00011674  | 0.003504656 | 0.206979865  | -0.509804449 | 0.405998547 | 0.662511395 | 0.21883  |
| 10380637 | Hoxb6         | -0.196819934 | -0.399119665 | 0.098979363 | 0.326555564 | 0.003199199 | 0.039309261 | 0.202299731  | -0.297969799 | 0.678926965 | 0.493135144 | 0.219094 |
| 10562368 | 4931406P16Rik | -0.261618939 | -0.453108076 | 0.02718958  | 0.155158326 | 0.00084421  | 0.01498561  | 0.191489136  | -0.357363508 | 0.535838529 | 0.577387501 | 0.220415 |
| 10471677 | Dab2ip        | -0.195719678 | -0.397974971 | 0.101730066 | 0.33120907  | 0.003339919 | 0.040495537 | 0.202255293  | -0.296847325 | 0.681344502 | 0.491788913 | 0.220659 |
| 10546944 | Tmem111       | 0.23259028   | 0.455211099  | 0.079705559 | 0.28851816  | 0.002557307 | 0.033558771 | -0.222620818 | 0.34390069   | 0.647340424 | 0.510950372 | 0.220745 |
| 10542522 | Plekha5       | -0.239502574 | -0.442070632 | 0.050981522 | 0.224844278 | 0.001598927 | 0.023805838 | 0.202568059  | -0.340786603 | 0.59441321  | 0.54177445  | 0.22108  |
| 10529732 | Hs3st1        | -0.18335852  | -0.386266277 | 0.124807435 | 0.369057473 | 0.004239433 | 0.047643508 | 0.202907757  | -0.284812398 | 0.712425999 | 0.47469461  | 0.221627 |
| 10451039 | Slc25a27      | 0.318560546  | -0.509323419 | 0.009625728 | 0.080637461 | 0.000316581 | 0.00738057  | 0.190762873  | -0.413941982 | 0.460844468 | 0.625458273 | 0.221801 |
| 10402435 | Serpina3c     | 0.508030069  | 0.793139118  | 0.006873158 | 0.064336293 | 0.00023861  | 0.005999466 | -0.285109049 | 0.650584594  | 0.438235168 | 0.640530845 | 0.225665 |
| 10436449 |               | -0.284893758 | -0.580867906 | 0.107290098 | 0.340242441 | 0.003701049 | 0.043457701 | 0.295974148  | -0.432880832 | 0.68373124  | 0.490462212 | 0.226099 |
| 10346841 | Il10rb        | 0.330157372  | 0.52544908   | 0.009527625 | 0.080103202 | 0.00032446  | 0.007509673 | -0.195291708 | 0.427803226  | 0.456498913 | 0.628333714 | 0.226409 |
| 10350438 | Kcnt2         | 0.351866741  | 0.572912672  | 0.013645859 | 0.100574035 | 0.000459433 | 0.009676066 | -0.221045931 | 0.462389706  | 0.678051151 | 0.614171684 | 0.227853 |
| 10419934 | Myh7          | -0.186096944 | -0.370283238 | 0.094524972 | 0.31857497  | 0.003291161 | 0.040169558 | 0.184186294  | -0.278190091 | 0.662087903 | 0.502579985 | 0.229116 |
| 10479811 | Mcm10         | 0.251759827  | 0.44510693   | 0.037087797 | 0.18589525  | 0.001233684 | 0.019840976 | -0.193347103 | 0.348433378  | 0.554904078 | 0.565616507 | 0.229539 |
| 10542929 | Calcr         | -0.235107401 | -0.434256828 | 0.055792184 | 0.236510946 | 0.001891283 | 0.026922746 | 0.199149427  | -0.334682114 | 0.595040543 | 0.541401737 | 0.230629 |
| 10579894 | Hhip          | -0.338726935 | -0.538410974 | 0.009995537 | 0.082550015 | 0.000352169 | 0.007936333 | 0.19968404   | -0.438568954 | 0.455308197 | 0.629123385 | 0.231518 |
| 10601326 | Uprt          | 0.230024864  | 0.454994497  | 0.092743205 | 0.315855248 | 0.003287693 | 0.040146768 | -0.224969633 | 0.342509681  | 0.656827079 | 0.505555266 | 0.231692 |
| 10590628 | Ccr3          | 1.225404439  | 1.712686989  | 0.000639036 | 0.012183844 | 3.01E-005   | 0.001273293 | -0.48728255  | 1.469045714  | 0.331700059 | 0.715486511 | 0.232033 |
| 10490818 | Stmn2         | -0.518563487 | -0.779250925 | 0.003716262 | 0.042099263 | 0.000142976 | 0.004146777 | 0.260687438  | -0.648907206 | 0.401732999 | 0.665464063 | 0.2323   |
| 10577973 | Adrb3         | -0.437468867 | -0.670334809 | 0.005453017 | 0.054717768 | 0.000203087 | 0.005324666 | 0.232865943  | -0.553901838 | 0.420410128 | 0.652612487 | 0.232748 |
| 10600082 | Nsdhl         | 0.328691637  | 0.583667277  | 0.040059349 | 0.194858035 | 0.001369858 | 0.021466123 | -0.25497564  | 0.456179457  | 0.558937138 | 0.563148989 | 0.233067 |
| 10488415 | Cst3          | -0.272035268 | -0.519865338 | 0.074193336 | 0.278452915 | 0.002608126 | 0.033913568 | 0.247830007  | -0.395950303 | 0.62591206  | 0.523280258 | 0.233167 |
| 10515803 | 1110020C03Rik | -0.256669066 | -0.454218463 | 0.04009043  | 0.194968009 | 0.001407953 | 0.021929217 | 0.197549397  | -0.355443765 | 0.555782422 | 0.565078453 | 0.236623 |
| 10381298 | Ramp2         | -0.471248886 | -0.807426909 | 0.02881126  | 0.159840307 | 0.001014771 | 0.017213996 | 0.336178024  | -0.639337898 | 0.525822143 | 0.58364278  | 0.23718  |
| 10489909 | Ube2v1        | -0.330325078 | -0.505675992 | 0.00571836  | 0.056693268 | 0.000218913 | 0.005658672 | 0.175350914  | -0.418000535 | 0.419499257 | 0.653234647 | 0.237261 |
| 10580885 | Csnk2a2       | 0.281467205  | 0.473698742  | 0.023660614 | 0.142112665 | 0.000841222 | 0.014953252 | -0.192231537 | 0.377582974  | 0.509110713 | 0.594190316 | 0.238069 |
| 10395356 | Agr3          | -0.325494861 | -0.522252926 | 0.012650498 | 0.095672651 | 0.000463051 | 0.009739519 | 0.196758065  | -0.423873893 | 0.464190099 | 0.623251388 | 0.238792 |
| 10503723 | Mdn1          | 0.191488628  | 0.375832881  | 0.092858781 | 0.315988225 | 0.003477186 | 0.04166779  | -0.184344253 | 0.283660755  | 0.649875778 | 0.509504722 | 0.238868 |
| 10603860 | Cfp           | 0.325785161  | 0.528411061  | 0.015122659 | 0.107645152 | 0.000556109 | 0.01103984  | -0.2026259   | 0.427098111  | 0.474424716 | 0.616537361 | 0.240677 |
| 10452648 | Emilin2       | 0.324081057  | 0.522987604  | 0.014129238 | 0.102797416 | 0.000522361 | 0.010565767 | -0.198906546 | 0.42353433   | 0.469635003 | 0.619672541 | 0.240983 |
| 10607705 | S100g         | -0.512257448 | -0.741333945 | 0.001884964 | 0.026252441 | 8.29E-005   | 0.002734382 | 0.229076497  | -0.626795696 | 0.365472352 | 0.690994189 | 0.241599 |
| 10498357 | F630111L10Rik | 0.312653779  | 0.605382813  | 0.08842266  | 0.306591147 | 0.003434331 | 0.041366689 | -0.292729034 | 0.459018296  | 0.637728467 | 0.516456319 | 0.244426 |
| 10495343 | Wdr47         | -0.197086304 | -0.378418911 | 0.085001736 | 0.299992246 | 0.003347037 | 0.040556413 | 0.181332608  | -0.287752608 | 0.630168426 | 0.520815154 | 0.246798 |
| 10395259 | Nampt         | 0.319452424  | 0.545012276  | 0.031084497 | 0.167129631 | 0.001193871 | 0.019305219 | -0.225559852 | 0.43223235   | 0.521848612 | 0.586138034 | 0.249181 |
| 10446470 | Gm9984        | -0.365904829 | -0.561704157 | 0.007463518 | 0.068151402 | 0.000311247 | 0.007276045 | 0.195799329  | -0.463804493 | 0.422159189 | 0.651419121 | 0.252812 |
| 10584628 | Thy1          | 0.48153556   | 0.707564077  | 0.00323298  | 0.038312156 | 0.000145656 | 0.004182226 | -0.226028517 | 0.594549819  | 0.380167498 | 0.680553996 | 0.253819 |
| 10358670 | Hmcn1         | -0.270244527 | -0.451781253 | 0.026224811 | 0.151879506 | 0.001051139 | 0.017599889 | 0.181536726  | -0.36101289  | 0.502853861 | 0.598175611 | 0.255107 |
| 10358583 | Hmcn1         | -0.258827356 | -0.45393195  | 0.04366735  | 0.205397387 | 0.001756922 | 0.025565009 | 0.195104594  | -0.356379653 | 0.547462774 | 0.570189775 | 0.255123 |
| 10545065 | Gprin3        | -0.304798572 | -0.486455892 | 0.014517643 | 0.104669028 | 0.000596888 | 0.011633204 | 0.18165732   | -0.395627232 | 0.459162832 | 0.626569802 | 0.256421 |
| 10502770 | Lphn2         | -0.410348837 | -0.797082586 | 0.098944054 | 0.326555564 | 0.004277549 | 0.047956255 | 0.386733749  | -0.603715712 | 0.640589173 | 0.514813452 | 0.257564 |
| 10352936 | Sox17         | -0.367227558 | -0.548714253 | 0.004921985 | 0.050983529 | 0.000220698 | 0.00568762  | 0.181486695  | -0.457970905 | 0.396284334 | 0.669250991 | 0.258892 |
| 10498978 | Lrat          | -0.47574395  | -0.685521739 | 0.002288042 | 0.030335461 | 0.000110893 | 0.003380523 | 0.209777789  | -0.580632844 | 0.361291633 | 0.693988131 | 0.259901 |
| 10484283 | Pde1a         | 0.306020674  | 0.481967153  | 0.012698231 | 0.095892375 | 0.000544068 | 0.010900098 | -0.17594648  | 0.393993913  | 0.446571568 | 0.634940932 | 0.261625 |
| 10424584 | Dennd3        | -0.368048673 | -0.550570257 | 0.005249167 | 0.053192116 | 0.000238642 | 0.005999466 | 0.182521583  | -0.459309465 | 0.397382587 | 0.668486299 | 0.261834 |
| 10447317 | Epas1         | -0.429169279 | -0.67125914  | 0.011465367 | 0.089626867 | 0.000495034 | 0.010211815 | 0.242089861  | -0.55021421  | 0.439992019 | 0.639349625 | 0.262004 |
| 10504743 | Nans          | 0.316289426  | 0.491804073  | 0.010464092 | 0.084868832 | 0.000454568 | 0.00962695  | -0.175514648 | 0.404046749  | 0.434391931 | 0.643120793 | 0.262174 |
| 10487588 | Il1a          | 0.499229262  | 0.804853199  | 0.017980613 | 0.119806559 | 0.000764868 | 0.013953537 | -0.305623937 | 0.65204123   | 0.468718729 | 0.620273688 | 0.262617 |
| 10553336 | Zdhc13        | 0.403919217  | 0.615071046  | 0.007433001 | 0.067961708 | 0.000331896 | 0.007626785 | -0.211151829 | 0.509495132  | 0.414433458 | 0.656703351 | 0.263081 |
| 10564527 | Nr2f2         | -0.225150317 | -0.408051707 | 0.063475506 | 0.254576452 | 0.002779932 | 0.035338972 | 0.18290139   | -0.316601012 | 0.577703113 | 0.551769085 | 0.264895 |



Suppl Table 1

|          |               |              |              |             |             |             |             |              |               |             |              |          |
|----------|---------------|--------------|--------------|-------------|-------------|-------------|-------------|--------------|---------------|-------------|--------------|----------|
| 10439312 | Cd86          | 0.508752177  | 0.763971102  | 0.005910133 | 0.057983265 | 0.000271778 | 0.00659358  | -0.255218926 | 0.636361639   | 0.40105957  | 0.665931179  | 0.265045 |
| 10519857 | Hgf           | -0.296582145 | -0.472036928 | 0.015494191 | 0.109259583 | 0.000674477 | 0.012683128 | 0.175454782  | -0.384309536  | 0.456545481 | 0.628302847  | 0.265289 |
| 10397633 | Flrt2         | 0.378561546  | 0.599740998  | 0.01468814  | 0.105529525 | 0.000645588 | 0.012302116 | -0.221179452 | 0.489151272   | 0.45216984  | 0.631208383  | 0.266425 |
| 10514510 | Cyp2j6        | -0.252208295 | -0.429730416 | 0.036561137 | 0.184154486 | 0.001593158 | 0.023767516 | 0.177522212  | -0.340969356  | 0.520639516 | 0.58689887   | 0.267165 |
| 10351788 | Pigm          | 0.262545074  | 0.459734828  | 0.048067686 | 0.217125459 | 0.002114032 | 0.029142308 | -0.197189754 | 0.361139951   | 0.546020328 | 0.571079365  | 0.267501 |
| 10373073 | D10Erttd610e  | -0.295022111 | -0.4722642   | 0.017251333 | 0.116743269 | 0.000759496 | 0.013890484 | 0.17724209   | -0.383643156  | 0.461997268 | 0.624697172  | 0.267552 |
| 10468159 | Ldb1          | -0.216976471 | -0.382706499 | 0.051455744 | 0.226352361 | 0.002271854 | 0.030772527 | 0.165730028  | -0.299841485  | 0.552725478 | 0.566952668  | 0.267673 |
| 10420637 | Kpna3         | 0.344198563  | 0.573941019  | 0.029070374 | 0.160710393 | 0.001272177 | 0.02026954  | -0.229742457 | 0.459069791   | 0.500452134 | 0.599710686  | 0.268015 |
| 10567464 | Dnahc3        | -0.318769892 | -0.513019237 | 0.018854522 | 0.123607846 | 0.000835469 | 0.014892002 | 0.194249346  | -0.415894565  | 0.46706392  | 0.621360504  | 0.268924 |
| 10515771 | Tie1          | -0.239332552 | -0.428051283 | 0.058932842 | 0.243785364 | 0.002648912 | 0.03425303  | 0.18871873   | -0.333691917  | 0.565547802 | 0.559121213  | 0.269312 |
| 10385837 | Il13          | 0.392713448  | 0.593163112  | 0.007118895 | 0.065824131 | 0.000335021 | 0.007671113 | -0.200449664 | 0.49293828    | 0.406642519 | 0.662066538  | 0.27075  |
| 10475218 |               | -0.379745225 | -0.629484221 | 0.028265415 | 0.158409755 | 0.001270636 | 0.020260477 | 0.249738996  | -0.504614723  | 0.494910244 | 0.603264089  | 0.272016 |
| 10554839 | Picalm        | 0.288127164  | 0.486959047  | 0.035782941 | 0.181876539 | 0.001631568 | 0.024179607 | -0.198831882 | 0.387543106   | 0.513057462 | 0.591686645  | 0.273943 |
| 10523563 | Cds1          | -0.197868391 | -0.364027206 | 0.076806462 | 0.28337908  | 0.003641238 | 0.042951887 | 0.166158815  | -0.280947799  | 0.591422378 | 0.543553855  | 0.274443 |
| 10502405 | Metap1        | 0.260171609  | 0.426829365  | 0.025694215 | 0.150163732 | 0.001176994 | 0.019084702 | -0.166657756 | 0.343500487   | 0.48517473  | 0.609544774  | 0.274776 |
| 10424349 | Sqle          | 0.244811251  | 0.414982417  | 0.038309355 | 0.189867642 | 0.001794769 | 0.025934525 | -0.170171166 | 0.329896834   | 0.515831461 | 0.589931624  | 0.277849 |
| 10468916 | Fam171a1      | -0.228428711 | -0.409334376 | 0.065862896 | 0.260493434 | 0.003228763 | 0.039615626 | 0.180905665  | -0.318881544  | 0.567313063 | 0.558049175  | 0.281186 |
| 10461979 | Aldh1a1       | -0.375629036 | -0.568864425 | 0.008683552 | 0.075187505 | 0.00043388  | 0.00929275  | 0.193235389  | -0.472246731  | 0.409183117 | 0.66031381   | 0.282231 |
| 10587241 | Hmgcll1       | -0.223765107 | -0.4088757   | 0.077594753 | 0.284895166 | 0.003890955 | 0.045048731 | 0.185110593  | -0.316320403  | 0.585199663 | 0.547269272  | 0.282702 |
| 10391332 | Ptrf          | -0.245397102 | -0.432298898 | 0.05812175  | 0.241990118 | 0.002871261 | 0.036323073 | 0.186901797  | -0.338848     | 0.551580049 | 0.567656089  | 0.283526 |
| 10406551 | Ssbp2         | -0.26780986  | -0.451414787 | 0.038157383 | 0.189480306 | 0.00185834  | 0.026603383 | 0.183604927  | -0.359612324  | 0.510563501 | 0.593267805  | 0.283769 |
| 10389627 | Rad51c        | 0.324784506  | 0.518752906  | 0.020239778 | 0.128911818 | 0.000991416 | 0.016908746 | -0.1939684   | 0.421768706   | 0.459892821 | 0.626087107  | 0.284567 |
| 10511835 | Fhl5          | 0.308914271  | 0.523372678  | 0.041001489 | 0.197638729 | 0.002026769 | 0.028288797 | -0.214458407 | 0.416143475   | 0.515347277 | 0.590237672  | 0.285796 |
| 10596575 | Manf          | 0.481185815  | 0.685319783  | 0.002644026 | 0.033464917 | 0.000148915 | 0.004247055 | -0.204133969 | 0.583252799   | 0.349992266 | 0.702133261  | 0.286854 |
| 10364011 | Cytsa         | -0.370761304 | -0.542771219 | 0.004913272 | 0.050938522 | 0.000263909 | 0.006457589 | 0.172009915  | -0.456766261  | 0.376581919 | 0.683089469  | 0.28768  |
|          | ENSMUSG000000 |              |              |             |             |             |             |              |               |             |              |          |
| 10367434 | 65996         | -0.345262116 | -0.517250718 | 0.007781782 | 0.069913467 | 0.000407259 | 0.00887477  | 0.171988602  | -0.431256417  | 0.398808215 | 0.667494706  | 0.288639 |
| 10368317 | Enpp3         | 0.382453271  | 0.581606293  | 0.01019251  | 0.083585092 | 0.000527219 | 0.010630527 | -0.199153022 | 0.482029782   | 0.413155015 | 0.65758104   | 0.28922  |
| 10439483 | Cdgap         | -0.269050139 | -0.487914919 | 0.077228685 | 0.28416082  | 0.004055523 | 0.046121917 | 0.21886478   | -0.378482529  | 0.578269176 | 0.551428391  | 0.289801 |
| 10592533 |               | -0.258316246 | -0.440926858 | 0.046916578 | 0.214585662 | 0.00243288  | 0.032339286 | 0.182610612  | -0.349621552  | 0.522309369 | 0.58584829   | 0.292548 |
| 10456289 |               | -0.254238836 | -0.441562618 | 0.056657255 | 0.238562734 | 0.003024226 | 0.037737395 | 0.187323782  | -0.347900727  | 0.53844033  | 0.575770741  | 0.295704 |
| 10585194 | Il18          | -0.851445754 | -1.203440647 | 0.002595678 | 0.033048547 | 0.000155903 | 0.004378259 | 0.351994893  | -1.027443201  | 0.342593044 | 0.707509553  | 0.297589 |
| 10461775 | Gm5244        | 0.456902547  | 0.656629614  | 0.003957133 | 0.043970431 | 0.000232637 | 0.005912207 | -0.199727067 | 0.55676608    | 0.358727075 | 0.695829943  | 0.300053 |
| 10542414 | Ptpro         | 0.243471518  | 0.426319219  | 0.063107747 | 0.253696109 | 0.00349012  | 0.041771998 | -0.182847701 | 0.334895369   | 0.545984561 | 0.5711101436 | 0.300265 |
| 10523145 | Cxcl15        | 0.334350268  | 0.48808371   | 0.005616408 | 0.055920073 | 0.000324281 | 0.007509673 | -0.153733442 | 0.411216989   | 0.373849928 | 0.685026485  | 0.301425 |
| 10395103 | Pxdn          | -0.331113591 | -0.50300654  | 0.011848167 | 0.091574453 | 0.000661346 | 0.012491123 | 0.171892948  | -0.417060066  | 0.412153937 | 0.65826896   | 0.302852 |
| 10421269 | Sorbs3        | -0.430335633 | -0.626134535 | 0.005546284 | 0.055415341 | 0.000328039 | 0.007551669 | 0.195798903  | -0.528235084  | 0.370666221 | 0.687289406  | 0.305387 |
| 10416406 | Htr2a         | 0.268343221  | 0.45948494   | 0.054201107 | 0.232764601 | 0.003079608 | 0.038279596 | -0.191141719 | 0.36391408    | 0.525238591 | 0.58400874   | 0.306003 |
| 10499113 | Gm1019        | -0.266084944 | -0.449517268 | 0.047746978 | 0.216633428 | 0.00270047  | 0.034692524 | 0.183432324  | -0.357801106  | 0.512665615 | 0.591934866  | 0.306215 |
| 10384622 | Ehbp1         | -0.214728317 | -0.382118571 | 0.076014652 | 0.281852067 | 0.00445771  | 0.049360654 | 0.167390254  | -0.298423444  | 0.560915226 | 0.56194159   | 0.307375 |
| 10518300 | Tnfrsf1b      | 0.386851959  | 0.55913448   | 0.004967139 | 0.051244582 | 0.000299535 | 0.007066598 | -0.172282521 | 0.472993219   | 0.364238882 | 0.691876413  | 0.307389 |
| 10525733 | Setd8         | 0.298022598  | 0.493470049  | 0.03927547  | 0.192868331 | 0.002223484 | 0.030309292 | -0.195447451 | 0.395746323   | 0.493870541 | 0.603932496  | 0.307429 |
| 10557470 | Gdpd3         | -0.341428013 | -0.501738518 | 0.006962575 | 0.064775415 | 0.00041103  | 0.008918269 | 0.160310506  | -0.421583266  | 0.380258229 | 0.680489937  | 0.307598 |
| 10566350 | A530023O14Rik | -0.220274895 | -0.383509225 | 0.063739271 | 0.255434754 | 0.003695951 | 0.04341861  | 0.62323433   | -0.30189206   | 0.540704283 | 0.574366614  | 0.307721 |
| 10595909 |               | 0.279876819  | 0.45094824   | 0.028884086 | 0.160094305 | 0.001632701 | 0.024182437 | -0.171071421 | 0.365412529   | 0.468159703 | 0.620640672  | 0.307934 |
| 10405058 | Omd           | -0.417644571 | -0.698703646 | 0.044418854 | 0.207562926 | 0.00255078  | 0.033507384 | 0.281059075  | -0.558174109  | 0.503532985 | 0.597742081  | 0.30913  |
| 10492522 | Schip1        | -0.240667692 | -0.39832624  | 0.039746548 | 0.194030886 | 0.002276183 | 0.030811126 | 0.157658548  | -0.319496966  | 0.493458669 | 0.604197434  | 0.309248 |
| 10345666 | Pdcl3         | -0.230700453 | -0.392689859 | 0.052810854 | 0.229132692 | 0.003062984 | 0.038109873 | 0.161989406  | -0.3191695156 | 0.519704599 | 0.587487677  | 0.309541 |
| 10396608 | Syne2         | -0.397923531 | -0.561478832 | 0.003036314 | 0.036730948 | 0.000193797 | 0.005149476 | 0.163555301  | -0.479701182  | 0.340952466 | 0.708706203  | 0.310638 |
| 10445308 | Cyp39a1       | -0.270954889 | -0.437888634 | 0.031301072 | 0.167766951 | 0.001819445 | 0.026207358 | 0.166933745  | -0.354421762  | 0.47100309  | 0.618775798  | 0.312423 |
| 10406031 | Lpcat1        | -0.217905713 | -0.378521366 | 0.065053267 | 0.258401    | 0.003898237 | 0.045092361 | 0.160615653  | -0.29821354   | 0.538592757 | 0.575676126  | 0.312822 |
| 10580033 | Cd97          | -0.391102509 | -0.61667392  | 0.023063205 | 0.140081956 | 0.001344002 | 0.021178582 | 0.22557141   | -0.503888215  | 0.447661612 | 0.634212826  | 0.312906 |
| 10352717 | Batf3         | 0.225200035  | 0.386540021  | 0.058781656 | 0.243395315 | 0.003508303 | 0.041884248 | -0.161339986 | 0.305870028   | 0.5274789   | 0.582604706  | 0.31324  |
| 10492335 | Rap2b         | 0.322535645  | 0.502306822  | 0.019859339 | 0.127405528 | 0.001172744 | 0.019027802 | -0.179771176 | 0.412421234   | 0.435892146 | 0.642108829  | 0.314809 |
| 10556509 | Spon1         | -0.346585705 | -0.511288368 | 0.008384037 | 0.07342254  | 0.000514899 | 0.010482369 | 0.164702663  | -0.428937036  | 0.383978647 | 0.677867377  | 0.31622  |
| 10505894 | Mtap          | 0.293653019  | 0.469677047  | 0.029474419 | 0.162210416 | 0.0017819   | 0.025823294 | -0.176024028 | 0.381665033   | 0.4612003   | 0.62522327   | 0.319047 |

Suppl Table 1

|          |               |              |              |             |             |             |             |              |              |             |             |          |
|----------|---------------|--------------|--------------|-------------|-------------|-------------|-------------|--------------|--------------|-------------|-------------|----------|
| 10358589 | Hmcn1         | -0.572716657 | -0.814765043 | 0.004327646 | 0.046425458 | 0.000286326 | 0.006843021 | 0.242048386  | -0.69374085  | 0.348903176 | 0.702922471 | 0.321965 |
| 10418480 | Gnl3          | 0.34863463   | 0.520851117  | 0.01135779  | 0.089343135 | 0.000712903 | 0.01325039  | -0.172216488 | 0.434742874  | 0.396134124 | 0.669355634 | 0.322465 |
| 10376577 |               | -0.347998279 | -0.602471303 | 0.068338878 | 0.265856672 | 0.004369428 | 0.048635939 | 0.254473024  | -0.475234791 | 0.535468003 | 0.577618016 | 0.322917 |
| 10410766 | Nr2f1         | -0.304496274 | -0.481829796 | 0.027212032 | 0.155182945 | 0.001698112 | 0.024906932 | 0.177333522  | -0.393163035 | 0.451043223 | 0.631958165 | 0.324471 |
| 10407563 |               | -0.296206469 | -0.485465392 | 0.042254296 | 0.201414541 | 0.002707978 | 0.034736312 | 0.189258922  | -0.39083593  | 0.484241359 | 0.610149507 | 0.327641 |
| 10551025 | Cd79a         | 0.364553246  | 0.588703501  | 0.035925705 | 0.182277327 | 0.002294083 | 0.030926746 | -0.224150254 | 0.476628373  | 0.470283069 | 0.619247628 | 0.327794 |
| 10402864 | Igh           | 0.291355761  | 0.442768982  | 0.016019108 | 0.111159356 | 0.00102684  | 0.01730622  | -0.151413221 | 0.367062372  | 0.41249998  | 0.658031102 | 0.328063 |
| 10561854 | Tbc1          | 0.284544324  | 0.447894673  | 0.026829198 | 0.154026361 | 0.001726755 | 0.025226156 | -0.163350349 | 0.366219498  | 0.446044926 | 0.635292941 | 0.329759 |
| 10556583 | Nucb2         | 0.308327514  | 0.500512615  | 0.038882319 | 0.191527055 | 0.002519914 | 0.033186997 | -0.192185101 | 0.404420065  | 0.475211588 | 0.616023462 | 0.329979 |
| 10357191 | Ptpn4         | -0.287316461 | -0.474953943 | 0.047203857 | 0.21532408  | 0.003081682 | 0.038286837 | 0.187637482  | -0.381135202 | 0.492312126 | 0.604935416 | 0.330063 |
| 10412882 | Thrb          | -0.260190639 | -0.441629741 | 0.061843977 | 0.250747972 | 0.004148497 | 0.046867797 | 0.181439102  | -0.35091019  | 0.517052817 | 0.589160137 | 0.332184 |
| 10606071 | Ercc6l        | 0.384544056  | 0.555406402  | 0.006908    | 0.064492231 | 0.000470726 | 0.009839255 | -0.170862346 | 0.469975229  | 0.363556068 | 0.692365184 | 0.332684 |
| 10344750 | Sgk3          | 0.3252543    | 0.517485084  | 0.031808173 | 0.16937079  | 0.002094444 | 0.028951239 | -0.192230784 | 0.421369692  | 0.456204581 | 0.628528841 | 0.333428 |
| 10446986 | Crim1         | -0.325553155 | -0.491268428 | 0.015402166 | 0.108781827 | 0.001024024 | 0.017292527 | 0.165715273  | -0.408410792 | 0.405756352 | 0.662678765 | 0.334276 |
| 10440600 | Cct8          | 0.331126482  | 0.489516452  | 0.010988492 | 0.087349835 | 0.000740629 | 0.013607982 | -0.15838997  | 0.410321467  | 0.386014338 | 0.67643586  | 0.334741 |
| 10376094 |               | 0.225877482  | 0.375657657  | 0.052489056 | 0.228740911 | 0.003554386 | 0.042239672 | -0.149780175 | 0.30076757   | 0.497993103 | 0.601285446 | 0.335453 |
| 10484402 | Ctnnd1        | -0.274695205 | -0.42143048  | 0.020500795 | 0.129737282 | 0.001381366 | 0.021589501 | 0.146735275  | -0.348062842 | 0.421576959 | 0.651816179 | 0.337544 |
| 10473399 | Prg2          | 0.448394485  | 0.668467264  | 0.013171056 | 0.098310428 | 0.000897391 | 0.015766078 | -0.220072779 | 0.558430874  | 0.394091352 | 0.670780021 | 0.337818 |
| 10420114 | Tgm1          | 0.343886841  | 0.512513666  | 0.013203217 | 0.098403073 | 0.000902701 | 0.015794501 | -0.168626825 | 0.428200253  | 0.393803655 | 0.670980822 | 0.338448 |
| 10528038 | Adam22        | -0.259889753 | -0.431966239 | 0.054904138 | 0.234435009 | 0.003861496 | 0.044889895 | 0.172076485  | -0.345927996 | 0.497434401 | 0.60164367  | 0.341576 |
| 10495134 | Gm4248        | 0.305478314  | 0.452090918  | 0.012834985 | 0.096596624 | 0.000916324 | 0.015956724 | -0.146612604 | 0.378784616  | 0.387060608 | 0.675701064 | 0.346059 |
| 10427895 | Basp1         | 0.405034088  | 0.582765169  | 0.007694828 | 0.069446779 | 0.000563097 | 0.011161051 | -0.177131081 | 0.493899629  | 0.359852631 | 0.695021099 | 0.346717 |
| 10359624 | Prrx1         | 0.254627601  | 0.416865297  | 0.049353474 | 0.220245579 | 0.003555609 | 0.042239672 | -0.162237696 | 0.335746449  | 0.483214927 | 0.61081506  | 0.346747 |
| 10576581 | Kcnk1         | 0.408419129  | 0.575718849  | 0.005157097 | 0.052642046 | 0.00039079  | 0.00862493  | -0.16729972  | 0.492068989  | 0.339992406 | 0.709407257 | 0.349009 |
| 10445347 | Clic5         | -0.365829266 | -0.55709521  | 0.021104662 | 0.132347869 | 0.001526955 | 0.02302449  | 0.191265944  | -0.461462238 | 0.414477997 | 0.65667279  | 0.350248 |
| 10413461 | Erc2          | -0.260233384 | -0.429956797 | 0.055677984 | 0.236285434 | 0.004119296 | 0.036640531 | 0.169723412  | -0.345095091 | 0.491816363 | 0.605254729 | 0.350308 |
| 10462237 | Smarca2       | -0.256358409 | -0.412181124 | 0.042222502 | 0.201368855 | 0.003092397 | 0.038345717 | 0.155822715  | -0.334269766 | 0.466158567 | 0.621955722 | 0.350811 |
| 10591816 | Dpy19l1       | 0.41102924   | 0.592796748  | 0.008686995 | 0.075187505 | 0.000652131 | 0.012399175 | -0.181767508 | 0.501912994  | 0.362149438 | 0.693372966 | 0.352503 |
| 10589350 | Shisa5        | 0.379346696  | 0.591127146  | 0.029792631 | 0.162963706 | 0.002193791 | 0.030016117 | -0.21178045  | 0.485236921  | 0.436447519 | 0.641734521 | 0.353265 |
| 10499988 | 2310007A19Rik | -0.271054637 | -0.435437668 | 0.042911249 | 0.202994094 | 0.003195757 | 0.039285766 | 0.164383031  | -0.353246153 | 0.465349813 | 0.622487802 | 0.353679 |
| 10361882 | Nhs1l         | -0.22942889  | -0.375336037 | 0.052415929 | 0.228539504 | 0.003962917 | 0.045431065 | 0.145907148  | -0.302382463 | 0.482525164 | 0.61126262  | 0.354754 |
| 10370544 | 2610008E11Rik | -0.253792493 | -0.395943693 | 0.030859459 | 0.166372738 | 0.002299692 | 0.030969835 | 0.1421512    | -0.324868093 | 0.437565902 | 0.640981274 | 0.355329 |
| 10601421 | A630033H20Rik | 0.615702294  | 0.878753901  | 0.007528757 | 0.068514801 | 0.000584383 | 0.011472304 | -0.263051607 | 0.747228098  | 0.352036557 | 0.700653839 | 0.357448 |
| 10358587 | Hmcn1         | -0.397800752 | -0.625944262 | 0.035533427 | 0.181182361 | 0.002710645 | 0.034736312 | 0.22814351   | -0.511872507 | 0.445703778 | 0.635521046 | 0.359045 |
| 10483178 | Cobll1        | -0.221974717 | -0.363767247 | 0.056078759 | 0.237099255 | 0.004403231 | 0.048948518 | 0.14179253   | -0.292870982 | 0.484146736 | 0.610210839 | 0.360854 |
| 10346000 | Gulp1         | -0.263691137 | -0.415820596 | 0.037236119 | 0.186420265 | 0.002879588 | 0.036392549 | 0.152129459  | -0.339755867 | 0.447761096 | 0.634146407 | 0.361297 |
| 10561702 | Kcnk6         | 0.276252093  | 0.414269547  | 0.019122057 | 0.124638128 | 0.001479264 | 0.02253397  | -0.138017454 | 0.34526082   | 0.399748382 | 0.66684142  | 0.362277 |
| 10428232 | Rrm2b         | -0.305188353 | -0.463955405 | 0.023792076 | 0.142486003 | 0.001854817 | 0.02656777  | 0.158767052  | -0.384571879 | 0.412841032 | 0.657796741 | 0.363907 |
| 10498367 | P2ry13        | 0.366882312  | 0.521055777  | 0.007788982 | 0.069953672 | 0.000637264 | 0.012188737 | -0.154173464 | 0.443969045  | 0.347261743 | 0.704113319 | 0.367767 |
| 10485711 | Fibin         | -0.289198009 | -0.446851625 | 0.031009914 | 0.16697346  | 0.002483004 | 0.032867162 | 0.157653615  | -0.368024817 | 0.428377675 | 0.647190238 | 0.368411 |
| 10447118 | Gm9959        | -0.310061219 | -0.469945614 | 0.0243912   | 0.144802899 | 0.001969433 | 0.027714582 | 0.159884396  | -0.390003416 | 0.409956397 | 0.659781067 | 0.370392 |
| 10459262 | Ablim3        | -0.301705261 | -0.447535175 | 0.017802741 | 0.119062212 | 0.001445847 | 0.022285348 | 0.145829914  | -0.374620218 | 0.389274009 | 0.67414871  | 0.371169 |
| 10431035 | Till12        | 0.308555367  | 0.455884811  | 0.016720069 | 0.114589347 | 0.001359769 | 0.021347121 | -0.147329444 | 0.382220089  | 0.385457093 | 0.676827478 | 0.371253 |
| 10578222 | Dlc1          | -0.271206174 | -0.433249224 | 0.047655989 | 0.216633428 | 0.003955164 | 0.045423337 | 0.16204305   | -0.352227699 | 0.460051979 | 0.625981904 | 0.372544 |
| 10506050 | Nfia          | -0.306225062 | -0.480736258 | 0.040271036 | 0.195291317 | 0.003373006 | 0.040781121 | 0.174511196  | -0.39348066  | 0.443506412 | 0.636991816 | 0.375511 |
| 10604944 | Gabre         | -0.299288911 | -0.432492595 | 0.0121324   | 0.092959533 | 0.001021252 | 0.017268438 | 0.133203685  | -0.365890753 | 0.364053159 | 0.692009329 | 0.376409 |
| 10456653 | Myo5b         | -0.304155246 | -0.459915422 | 0.025578773 | 0.14969356  | 0.002153569 | 0.029536427 | 0.155760176  | -0.382035334 | 0.40771144  | 0.661328629 | 0.378183 |
| 10411668 | Ocnl          | -0.360116873 | -0.509236086 | 0.008230838 | 0.072526316 | 0.00071143  | 0.013242187 | 0.149119213  | -0.43467648  | 0.34305793  | 0.707170765 | 0.378826 |
| 10415784 | Trim13        | -0.273464308 | -0.417969013 | 0.030262023 | 0.164290523 | 0.002582284 | 0.033748512 | 0.144504705  | -0.34571666  | 0.417985945 | 0.654269335 | 0.380351 |
| 10382435 | Gprc5c        | -0.306288023 | -0.468340328 | 0.031278492 | 0.167739661 | 0.002710156 | 0.034736312 | 0.162052305  | -0.387314176 | 0.418400139 | 0.653986012 | 0.383129 |
| 10604906 | lds           | -0.3440072   | -0.48519326  | 0.008370067 | 0.073400365 | 0.000743255 | 0.013636797 | 0.14118606   | -0.41460023  | 0.340535411 | 0.709010674 | 0.384232 |
| 10567049 | Copb1         | 0.374837153  | 0.532457755  | 0.009862898 | 0.081849613 | 0.000877635 | 0.015471929 | -0.157620601 | 0.453647454  | 0.347451749 | 0.703975386 | 0.385866 |
| 10403558 | Ero1lb        | 0.386692899  | 0.567136508  | 0.017896521 | 0.11944043  | 0.001586985 | 0.023738193 | -0.180443609 | 0.476914703  | 0.378356146 | 0.681833903 | 0.387911 |
| 10373834 | Sec14l4       | -0.273532372 | -0.419165337 | 0.033871317 | 0.176243456 | 0.003023118 | 0.037737395 | -0.145632966 | -0.346348855 | 0.420480575 | 0.652564388 | 0.388437 |
| 10578322 | Pdgrfl        | 0.322032019  | 0.466847905  | 0.015075737 | 0.107400507 | 0.001354261 | 0.021286699 | -0.144815886 | 0.394439962  | 0.367143037 | 0.689800716 | 0.38994  |
| 10403455 | Dip2c         | -0.246129115 | -0.384543324 | 0.043804241 | 0.205712987 | 0.003995112 | 0.045613167 | 0.138414209  | -0.31533622  | 0.438941675 | 0.640055619 | 0.390952 |

Suppl Table 1

|          |               |              |              |             |             |             |             |              |              |             |             |          |
|----------|---------------|--------------|--------------|-------------|-------------|-------------|-------------|--------------|--------------|-------------|-------------|----------|
| 10494428 | Txnip         | -0.362981582 | -0.513724198 | 0.009846094 | 0.081790148 | 0.00090159  | 0.015794501 | 0.150742616  | -0.43835289  | 0.343884161 | 0.706568979 | 0.391479 |
| 10385153 | Ccdc99        | 0.54614532   | 0.768932685  | 0.009090857 | 0.077600309 | 0.000843124 | 0.014976678 | -0.222787365 | 0.657539002  | 0.33882     | 0.710264151 | 0.39344  |
| 10458828 | Cdo1          | -0.310927938 | -0.46156718  | 0.02297207  | 0.139693697 | 0.002094406 | 0.028951239 | 0.150639242  | -0.386247559 | 0.390006975 | 0.673635283 | 0.393485 |
| 10457071 | Cyb5          | -0.389221282 | -0.5613832   | 0.015921632 | 0.110902703 | 0.001521331 | 0.022970303 | 0.172161919  | -0.475302241 | 0.362215668 | 0.693325489 | 0.402229 |
| 10374590 | Xpo1          | 0.303552787  | 0.4365412    | 0.015234783 | 0.108053718 | 0.001461046 | 0.022341715 | -0.132988413 | 0.370046994  | 0.359382498 | 0.695358851 | 0.402824 |
| 10444407 | Ager          | -0.322976558 | -0.499321782 | 0.043293785 | 0.204276633 | 0.004205522 | 0.047386889 | 0.176345224  | -0.41114917  | 0.428908137 | 0.646830499 | 0.403201 |
| 10603425 | Glod5         | 0.373779251  | 0.530850867  | 0.012491844 | 0.094779972 | 0.001217424 | 0.019628675 | -0.157071616 | 0.452315059  | 0.347261523 | 0.704113479 | 0.405245 |
| 10552917 | 1700039E15Rik | 0.245511778  | 0.377318344  | 0.04185041  | 0.200189403 | 0.00414327  | 0.046833829 | -0.131806566 | 0.311415061  | 0.423250454 | 0.650675436 | 0.40718  |
| 10433264 | Glis2         | -0.258215261 | -0.385610517 | 0.028899862 | 0.160147161 | 0.002833676 | 0.035936162 | 0.127395255  | -0.321912889 | 0.3957445   | 0.669627124 | 0.407285 |
| 10481678 | 6330409D20Rik | -0.305213201 | -0.455900844 | 0.029017963 | 0.16052437  | 0.002846669 | 0.036065297 | 0.150687643  | -0.380557022 | 0.395966003 | 0.66947277  | 0.40737  |
| 10553559 | Siglech       | 0.303371637  | 0.445769608  | 0.022913388 | 0.139535194 | 0.002246836 | 0.030546502 | -0.142397971 | 0.374570623  | 0.380163212 | 0.680557022 | 0.407749 |
| 10358535 | Hmnc1         | -0.585567644 | -0.84377601  | 0.017581832 | 0.118166852 | 0.001764847 | 0.025652954 | 0.258208366  | -0.714671827 | 0.361296411 | 0.693984703 | 0.412277 |
| 10590060 | Ctdspl        | -0.271450565 | -0.404639332 | 0.029814727 | 0.163034601 | 0.003008917 | 0.037619524 | 0.133188767  | -0.338044949 | 0.39399721  | 0.670845723 | 0.412886 |
| 10593449 | Layn          | -0.267283156 | -0.403895458 | 0.03596095  | 0.182388782 | 0.003654632 | 0.043090074 | 0.136612302  | -0.335589307 | 0.407081809 | 0.661763213 | 0.413376 |
| 10417124 | B930095G15Rik | -0.336214343 | -0.490311006 | 0.022324267 | 0.137085956 | 0.00228345  | 0.030857755 | 0.154096663  | -0.413262674 | 0.37287825  | 0.685716492 | 0.416184 |
| 10497998 |               | 0.29732751   | 0.429287231  | 0.019429268 | 0.125931841 | 0.002007114 | 0.028106167 | -0.131959722 | 0.36330737   | 0.363217849 | 0.692607392 | 0.418176 |
| 10495035 | Slc16a1       | 0.28078307   | 0.409826782  | 0.023560952 | 0.141923767 | 0.00245604  | 0.03257966  | -0.129043712 | 0.345304926  | 0.373709446 | 0.685126209 | 0.419945 |
| 10592061 | Kcnj5         | -0.31699526  | -0.461310102 | 0.022521176 | 0.137932129 | 0.002348255 | 0.031425975 | 0.144314842  | -0.389152681 | 0.370843756 | 0.687163057 | 0.420043 |
| 10442240 | Zfp760        | -0.274388489 | -0.400744962 | 0.024220651 | 0.144165035 | 0.002546406 | 0.033467046 | 0.126356473  | -0.337566726 | 0.374315545 | 0.684696041 | 0.421624 |
| 10393449 | Socs3         | 0.368395168  | 0.527830383  | 0.017783756 | 0.118966235 | 0.001870826 | 0.026734324 | -0.159435215 | 0.448112776  | 0.355792612 | 0.697942331 | 0.421767 |
| 10523182 | Areg          | 0.290299961  | 0.410206296  | 0.014009492 | 0.102255463 | 0.001483779 | 0.022570317 | -0.119906335 | 0.350253128  | 0.342341939 | 0.707692602 | 0.42256  |
| 10589685 | Lrrc2         | -0.434551267 | -0.624007392 | 0.018724143 | 0.123107402 | 0.001980778 | 0.027814012 | 0.189456125  | -0.52927933  | 0.357951112 | 0.696388012 | 0.422963 |
| 10391103 | Jup           | -0.284262067 | -0.421131143 | 0.031046735 | 0.167031563 | 0.003338752 | 0.040495537 | 0.136869075  | -0.352696605 | 0.388064624 | 0.674996547 | 0.425461 |
| 10429446 | Gm628         | -0.303076622 | -0.43122301  | 0.017623584 | 0.118264613 | 0.001944209 | 0.02743483  | 0.128146388  | -0.367149816 | 0.349030239 | 0.702830356 | 0.431487 |
| 10477237 | BC020535      | -0.284310163 | -0.416457159 | 0.029423577 | 0.16206961  | 0.003328947 | 0.040438907 | 0.132146997  | -0.350383661 | 0.377149426 | 0.682687658 | 0.436039 |
| 10556216 | Ipo7          | 0.346994863  | 0.488708266  | 0.015984931 | 0.111072339 | 0.001827202 | 0.026287927 | -0.141713403 | 0.417851564  | 0.339147715 | 0.710024542 | 0.438694 |
| 10344981 | Pi15          | 0.311490554  | 0.44805556   | 0.022943783 | 0.139616406 | 0.002621234 | 0.033997891 | -0.136565006 | 0.379773057  | 0.359596353 | 0.695205197 | 0.438713 |
| 10375167 | Gm6041        | 0.306007697  | 0.43835087   | 0.022449566 | 0.137624903 | 0.002615605 | 0.033952574 | -0.132343173 | 0.372179283  | 0.355589843 | 0.69808849  | 0.442821 |
| 10578950 | Gm10664       | -0.277144775 | -0.394278801 | 0.021465489 | 0.133797033 | 0.002575448 | 0.03369276  | 0.117134027  | -0.335711788 | 0.348912462 | 0.702915738 | 0.449016 |
| 10606445 | Rps6ka6       | -0.293934748 | -0.426780161 | 0.031483912 | 0.168389363 | 0.003909322 | 0.045118924 | 0.132845413  | -0.360357455 | 0.368648994 | 0.688726363 | 0.4551   |
| 10436451 | Stx19         | -0.30074364  | -0.422260865 | 0.019724077 | 0.126886618 | 0.002508219 | 0.033083747 | 0.121517226  | -0.361502253 | 0.336145141 | 0.712222383 | 0.461411 |
| 10533844 | Rip12         | 0.293199401  | 0.42002327   | 0.028838118 | 0.159874043 | 0.003760684 | 0.043979073 | -0.126823869 | 0.356611335  | 0.355636114 | 0.698055135 | 0.465931 |
| 10493626 | 1700094D03Rik | -0.439821352 | -0.631570142 | 0.029933803 | 0.163407245 | 0.003908542 | 0.045118924 | 0.19174879   | -0.535695747 | 0.357943462 | 0.696393516 | 0.466034 |
| 10382425 | Gprc5c        | -0.289119552 | -0.404062362 | 0.020603174 | 0.130256716 | 0.002755632 | 0.035170859 | 0.11494281   | -0.346590957 | 0.331638226 | 0.715532005 | 0.472258 |
| 10492205 | Eif2a         | 0.339517248  | 0.483573813  | 0.029964793 | 0.163461976 | 0.004134298 | 0.046789748 | -0.144056565 | 0.411545531  | 0.350037976 | 0.702100153 | 0.477912 |
| 10561128 | Cyp2s1        | -0.265947574 | -0.374948112 | 0.026950532 | 0.154515579 | 0.00379766  | 0.044279472 | 0.109000539  | -0.320447843 | 0.340150639 | 0.709291672 | 0.482981 |
| 10420785 | Mtmr9         | -0.348234303 | -0.488338969 | 0.027782415 | 0.156775595 | 0.004111829 | 0.046576531 | 0.140104666  | -0.418286636 | 0.334948942 | 0.713099557 | 0.493661 |

Dataset S 1B: Genes showing a larger saline to OVA differential in NIH than congenic *Tgfbm2/3* mice $\Delta$ NIH S-O >  $\Delta$ Tgfbm2/3 S-O

| Probe ID | GeneName  | logFC.NIH    | logFC.Tgfbm2/3 | P.Value.NIH | adj.P.Val.NIH | P.Value.Tgfbm2/3 | adj.P.Val.Tgfbm2/3 | M = logFC diff | A = logFC avg | Abs(M/A)    | Abs logFC ratio | P.Value.Interaction |
|----------|-----------|--------------|----------------|-------------|---------------|------------------|--------------------|----------------|---------------|-------------|-----------------|---------------------|
| 10362424 | Trdn      | -1.172676654 | 0.323996161    | 8.08E-007   | 9.78E-005     | 0.031067767      | 0.183616728        | -1.496672814   | -0.424340246  | 3.527058361 | 3.619415277     | 2.53E-006           |
| 10555889 | Olfrr63   | -0.427185024 | 0.265198576    | 0.00105079  | 0.017506811   | 0.021907864      | 0.147148196        | -0.6923836     | -0.080993224  | 8.548660787 | 1.610811909     | 0.00341884          |
| 10423738 |           | -0.640193698 | 0.041703266    | 7.30E-005   | 0.002537799   | 0.716828929      | 0.897772271        | -0.681896964   | -0.299245216  | 2.278723026 | 15.3511645      | 0.000878445         |
| 10402981 | Gm900     | 0.781030118  | 0.085485857    | 1.44E-005   | 0.000754561   | 0.476457938      | 0.773396721        | 0.695544261    | 0.433257987   | 1.605381277 | 9.136366479     | 0.000997005         |
| 10351043 |           | 1.062617294  | 0.4529782      | 2.36E-007   | 3.82E-005     | 0.001129997      | 0.018545245        | 0.609639094    | 0.757797747   | 0.804487867 | 2.345846429     | 0.00164867          |
| 10392096 |           | 0.596668705  | -0.056813921   | 0.000221377 | 0.00564842    | 0.638873746      | 0.860573601        | 0.653482626    | 0.269927392   | 2.420957061 | 10.50215679     | 0.00178729          |
| 10503613 | Gm11878   | 0.808835952  | -0.01480398    | 0.000114454 | 0.003476705   | 0.922418796      | 0.975183637        | 0.823639932    | 0.397015986   | 2.074576243 | 54.63638366     | 0.00179206          |
| 10545220 | Igk       | 1.384262829  | 0.537022188    | 6.15E-007   | 7.91E-005     | 0.004079216      | 0.0463093          | 0.84724064     | 0.960642509   | 0.881952061 | 2.577664124     | 0.00189288          |
| 10397559 | Gm8655    | -0.60543591  | 0.254275889    | 0.001990805 | 0.027282427   | 0.129729949      | 0.41812008         | -0.859711799   | -0.17558001   | 4.896410461 | 2.381019732     | 0.00193224          |
| 10473483 | Olfrr1029 | -0.397831781 | 0.224440722    | 0.004274005 | 0.046094608   | 0.073369206      | 0.307016755        | -0.622272502   | -0.08669553   | 7.177676928 | 1.772547236     | 0.0021253           |
| 10538636 | V1rc2     | -0.485917528 | 0.090371311    | 0.000673695 | 0.012696338   | 0.42489343       | 0.737152048        | -0.576288839   | -0.197773108  | 2.913888767 | 5.376900279     | 0.00258124          |
| 10548314 | Klrb1b    | -0.3884294   | 0.184700419    | 0.003541182 | 0.040668933   | 0.115214959      | 0.39347227         | -0.573129819   | -0.101864491  | 5.626394575 | 2.130223931     | 0.00263766          |
| 10559580 | Syt5      | -0.478876743 | 0.096241714    | 0.000888836 | 0.015637184   | 0.405285127      | 0.722695472        | -0.575118457   | -0.191317514  | 3.006094135 | 4.975771116     | 0.00300886          |

Suppl Table 1

|          |               |              |              |             |             |             |             |              |              |             |             |            |
|----------|---------------|--------------|--------------|-------------|-------------|-------------|-------------|--------------|--------------|-------------|-------------|------------|
| 10376404 | Olfr320       | -0.402896917 | 0.172506885  | 0.003313903 | 0.039036833 | 0.148799465 | 0.451463908 | -0.575403801 | -0.115195016 | 4.995040771 | 2.335541085 | 0.00309679 |
| 10551250 |               | -0.825076236 | -0.058116371 | 0.000100015 | 0.003138356 | 0.70451321  | 0.891820539 | -0.766959865 | -0.441596304 | 1.736789594 | 14.19696756 | 0.00310589 |
| 10451291 | Slc22a7       | -0.547979459 | 0.129521022  | 0.001199039 | 0.019151795 | 0.34795345  | 0.676662562 | -0.677500482 | -0.209229219 | 3.23807777  | 4.230814813 | 0.00320535 |
| 10514830 | Ttc4          | 0.438564713  | -0.11677346  | 0.001636839 | 0.023671075 | 0.31154225  | 0.644118186 | 0.555338173  | 0.160895627  | 3.451542988 | 3.75568828  | 0.00360208 |
| 10558673 | Cyp2e1        | -1.076854373 | -0.431788431 | 2.13E-006   | 0.000193491 | 0.006755925 | 0.066136947 | -0.645065942 | -0.754321402 | 0.855160599 | 2.493939845 | 0.00476476 |
| 10385325 | Pttg1         | 0.622959049  | 0.135555801  | 4.14E-005   | 0.001667696 | 0.21185178  | 0.538601814 | 0.487403248  | 0.379257425  | 1.285151498 | 4.595591216 | 0.00531692 |
| 10522494 | Gm6116        | -0.383920273 | 0.138985916  | 0.004535067 | 0.047962958 | 0.237428889 | 0.569563058 | -0.522906189 | -0.122467179 | 4.269765942 | 2.762296247 | 0.00578355 |
| 10414965 |               | -0.611739999 | 0.17393735   | 0.003391902 | 0.039654451 | 0.328313633 | 0.658783172 | -0.785677349 | -0.218901325 | 3.589184992 | 3.51701345  | 0.00637644 |
| 10543017 | Pdk4          | -1.04655473  | -0.470585571 | 1.46E-006   | 0.000144537 | 0.002505257 | 0.033078667 | -0.575969159 | -0.75857015  | 0.759282656 | 2.223941391 | 0.00656963 |
| 10521964 | Gm10440       | -0.4515427   | 0.059461926  | 0.001454887 | 0.021838623 | 0.605758825 | 0.84395911  | -0.511004626 | -0.196040387 | 2.606629351 | 7.593812177 | 0.00675156 |
| 10568480 | Nsmce4a       | 0.373800016  | -0.102535715 | 0.003489157 | 0.040305892 | 0.346965204 | 0.676115824 | 0.476335732  | 0.13563215   | 3.511967702 | 3.645559157 | 0.00686921 |
| 10578690 | Neil3         | 1.30702682   | 0.834128621  | 1.56E-008   | 5.28E-006   | 2.81E-006   | 0.000241116 | 0.472898199  | 1.07057772   | 0.441722437 | 1.566936786 | 0.00789046 |
| 10350504 | Gm5263        | 0.527312774  | 0.028449937  | 0.000463027 | 0.00971788  | 0.806471505 | 0.936589928 | 0.498862838  | 0.277881356  | 1.795236807 | 18.53476079 | 0.00841303 |
| 10591123 | Fat3          | -1.095173841 | -0.613527892 | 1.87E-007   | 3.26E-005   | 8.98E-005   | 0.002885897 | -0.481645948 | -0.854350866 | 0.56375661  | 1.785043279 | 0.008571   |
| 10602196 | Rgag1         | -0.483747939 | 0.050463405  | 0.001711552 | 0.024433886 | 0.688454933 | 0.886915276 | -0.534211344 | -0.216642267 | 2.465868508 | 9.58611375  | 0.00892764 |
| 10451800 | 4921523A10Rik | -0.4283852   | 0.103245984  | 0.003987696 | 0.044214333 | 0.415768093 | 0.73119344  | -0.531631183 | -0.162569608 | 3.270175711 | 4.149170595 | 0.00908137 |
| 10538567 | V1rc32        | -0.594230623 | -0.115167942 | 0.000131739 | 0.00385134  | 0.319234209 | 0.650583857 | -0.479062682 | -0.354699283 | 1.350616438 | 5.159687791 | 0.00933731 |
| 10396694 | Churc1        | 0.408102744  | -0.073061638 | 0.002914483 | 0.035759542 | 0.52472464  | 0.801506475 | 0.481164382  | 0.167520553  | 2.872270733 | 5.585732216 | 0.00937618 |
| 10546533 |               | -0.412028817 | 0.081073922  | 0.003754551 | 0.042360845 | 0.500843857 | 0.788787588 | -0.493102739 | -0.165477447 | 2.979878814 | 5.082137448 | 0.0106474  |
| 10540296 |               | -0.573383887 | 0.022572342  | 0.001368868 | 0.020914347 | 0.87580754  | 0.958085258 | -0.595956229 | -0.275405772 | 2.163920618 | 25.40205538 | 0.010691   |
| 10585377 |               | -0.374614084 | 0.066428808  | 0.003432061 | 0.039933886 | 0.538142878 | 0.809722223 | -0.441042892 | -0.154092638 | 2.862193145 | 5.639331711 | 0.0108424  |
| 10492448 | Ptx3          | 1.004688405  | 0.470229082  | 2.55E-006   | 0.000216178 | 0.002702357 | 0.0346994   | 0.534459323  | 0.737458743  | 0.724731115 | 2.136593512 | 0.0108919  |
| 10487033 | Myef2         | 0.533573013  | 0.039243995  | 0.000616147 | 0.011968679 | 0.747135458 | 0.909990034 | 0.494329018  | 0.286408504  | 1.725957894 | 13.59629709 | 0.0115969  |
| 10566678 | Olfr485       | 0.395710375  | -0.063435117 | 0.003483332 | 0.040274716 | 0.578141143 | 0.831276617 | 0.459145493  | 0.166137629  | 2.763645392 | 6.23803331  | 0.0119202  |
| 10453715 | Rab18         | 1.312631572  | 0.738555662  | 3.41E-007   | 5.07E-005   | 0.000140198 | 0.004083921 | 0.57407591   | 1.025593617  | 0.559749886 | 1.777295388 | 0.0119695  |
| 10461150 |               | 1.301270862  | 0.462797943  | 2.40E-005   | 0.001116424 | 0.041037237 | 0.218445417 | 0.838472919  | 0.882034402  | 0.95061249  | 2.811747291 | 0.01227    |
| 10442493 |               | 1.147410031  | 0.513906621  | 4.85E-006   | 0.000349603 | 0.005417026 | 0.056430285 | 0.633503409  | 0.830658326  | 0.762652211 | 2.232720854 | 0.0123385  |
| 10575144 | Nip7          | 0.599512217  | 0.023632717  | 0.000934151 | 0.016168432 | 0.869436529 | 0.95651358  | 0.575879499  | 0.311572467  | 1.848300349 | 25.36789183 | 0.0126385  |
| 10502196 | Rpl34         | 0.545036062  | -0.04907054  | 0.002431282 | 0.031597355 | 0.741307398 | 0.906602141 | 0.594106601  | 0.247982761  | 2.395757667 | 11.10719522 | 0.0126755  |
| 10489528 | Wfdc9         | -0.492789089 | -0.040878551 | 0.000661428 | 0.012529554 | 0.718602104 | 0.898795381 | -0.451910538 | -0.26683382  | 1.693602927 | 12.05495499 | 0.012885   |
| 10566800 | Ascl3         | -0.422871877 | 0.06459063   | 0.004280249 | 0.046139116 | 0.607009523 | 0.844203286 | -0.487462507 | -0.179140624 | 2.721116501 | 6.546953921 | 0.0146245  |
| 10597511 | Gm5921        | 1.669656098  | 0.658122493  | 1.78E-005   | 0.000878131 | 0.022490797 | 1.149519235 | 1.011533605  | 1.163889295  | 0.869097782 | 2.536998987 | 0.0146475  |
| 10407803 | Gpr137b       | 0.790142803  | 0.231100108  | 8.91E-005   | 0.002907358 | 0.127084945 | 0.413332028 | 0.559042695  | 0.510621455  | 1.094828055 | 3.419049908 | 0.0153482  |
| 10538269 |               | 0.754743889  | 0.341897592  | 6.73E-006   | 0.000437371 | 0.00612793  | 0.061562307 | 0.412846296  | 0.54832074   | 0.75292847  | 2.207514489 | 0.0153552  |
| 10568150 | Kif22         | 0.55389459   | 0.093573646  | 0.000418011 | 0.009009147 | 0.442317132 | 0.749243003 | 0.460320944  | 0.323734118  | 1.421910507 | 5.919343882 | 0.0162912  |
| 10420155 | Dhrs1         | 0.591064179  | 0.149677201  | 0.000183545 | 0.004959869 | 0.214532345 | 0.541456856 | 0.441386978  | 0.37037069   | 1.191743812 | 3.948925923 | 0.0174412  |
| 10482772 | Nr4a2         | -0.591040232 | -0.176917531 | 0.000102659 | 0.003201763 | 0.124275205 | 0.408479881 | -0.4141227   | -0.383978881 | 1.078503846 | 3.340766896 | 0.017487   |
| 10550459 | Gm5155        | -0.477537668 | -0.07580368  | 0.000570027 | 0.011333421 | 0.485710469 | 0.779690667 | -0.401733988 | -0.276670674 | 1.452029527 | 6.299663388 | 0.0185326  |
| 10606060 | Gm4779        | -0.390859056 | 0.042558221  | 0.00455344  | 0.048097815 | 0.715716462 | 0.897049836 | -0.433417276 | -0.174150417 | 2.488752438 | 9.184102398 | 0.0188342  |
| 10515090 | Cdkn2c        | 0.38252636   | -0.016984316 | 0.003037841 | 0.036730948 | 0.874455281 | 0.957739318 | 0.399510677  | 0.182771022  | 2.185853491 | 22.5223291  | 0.0188415  |
| 10468738 | 1700019N19Rik | -0.383777859 | 0.013427768  | 0.00288766  | 0.035488721 | 0.900174999 | 0.967347762 | -0.397205626 | -0.185175045 | 2.145027835 | 28.5809124  | 0.0190136  |
| 10577623 | Gins4         | 0.675931079  | 0.246658772  | 4.70E-005   | 0.00184828  | 0.048734434 | 0.242660611 | 0.429272307  | 0.461294926  | 0.93058103  | 2.740348838 | 0.0190372  |
| 10538706 | Mmrr1         | -0.890728008 | -0.456614584 | 3.11E-006   | 0.000253202 | 0.00159067  | 0.023767516 | -0.434113424 | -0.673671296 | 0.644399467 | 1.950721768 | 0.0192732  |
| 10519555 | Abcb1b        | 0.762782476  | 0.260875724  | 7.09E-005   | 0.002487064 | 0.07274269  | 0.305390804 | 0.501906752  | 0.5118291    | 0.980613942 | 2.923930456 | 0.0197512  |
| 10541575 | Clec4a4       | 0.573536038  | 0.125897614  | 0.000361073 | 0.008073199 | 0.313945906 | 0.646275727 | 0.447638424  | 0.349716826  | 1.280002535 | 4.555575115 | 0.0206029  |
| 10384930 | 4930505A04Rik | -0.484847869 | -0.058629527 | 0.000970037 | 0.016577166 | 0.617339256 | 0.849735308 | -0.426218341 | -0.271738698 | 1.568485991 | 8.269687473 | 0.0206945  |
| 10490913 | Car3          | -1.449915421 | -0.807695978 | 1.30E-006   | 0.00013294  | 0.000435096 | 0.009298954 | -0.642219443 | -1.128805699 | 0.568937102 | 1.795125221 | 0.0209434  |
| 10595094 | 2310046A06Rik | -0.763876755 | -0.342286674 | 1.44E-005   | 0.000754561 | 0.010168782 | 0.088628962 | -0.421590081 | -0.553081715 | 0.762256407 | 2.231687099 | 0.0213646  |
| 10428004 | Ankrd33b      | -0.715184757 | -0.32572169  | 1.28E-005   | 0.000700758 | 0.008644976 | 0.079115147 | -0.389463067 | -0.520453223 | 0.748315217 | 2.19569276  | 0.021576   |
| 10420668 |               | 0.559857902  | 0.031683697  | 0.001807293 | 0.025418959 | 0.828664445 | 0.942930448 | 0.528174205  | 0.295770799  | 1.785755071 | 17.67022015 | 0.0218336  |
| 10450694 | H2-T22        | 0.471233038  | 0.062960294  | 0.000941777 | 0.016225242 | 0.579936241 | 0.83179007  | 0.408272745  | 0.267096666  | 1.528557996 | 7.484606725 | 0.0218365  |
| 10604743 | Snord61       | 1.041958337  | 0.395486775  | 5.10E-005   | 0.001955703 | 0.043009774 | 0.224796353 | 0.646471562  | 0.718722556  | 0.899473039 | 2.63462245  | 0.0223378  |
| 10449363 | Nudt3         | 0.475544554  | 0.027151213  | 0.001897148 | 0.026387069 | 0.828282881 | 0.942768169 | 0.448393341  | 0.251347883  | 1.78395511  | 17.51467073 | 0.0226119  |
| 10383309 |               | 0.912482273  | 0.464902502  | 4.88E-006   | 0.000349883 | 0.002260104 | 0.030633438 | 0.447579771  | 0.688692388  | 0.64989795  | 1.962739001 | 0.0229717  |
| 10411728 | Cenph         | 1.458503112  | 0.882917137  | 4.37E-007   | 6.06E-005   | 8.67E-005   | 0.00281608  | 0.575585975  | 1.170710125  | 0.491655418 | 1.651913924 | 0.022973   |
| 10368886 | Foxo3         | -0.411471747 | 0.018952862  | 0.004049861 | 0.044710469 | 0.875130843 | 0.957933012 | -0.430424609 | -0.196259442 | 2.193140899 | 21.71026919 | 0.0230775  |

Suppl Table 1

|          |               |               |              |             |              |             |             |              |              |             |             |           |
|----------|---------------|---------------|--------------|-------------|--------------|-------------|-------------|--------------|--------------|-------------|-------------|-----------|
| 10408321 | Gmnn          | 0.659889538   | 0.269661584  | 3.47E-005   | 0.001465408  | 0.026038691 | 0.164297226 | 0.390227954  | 0.464775561  | 0.839605148 | 2.447102505 | 0.0233147 |
| 10518855 | Klh121        | -0.406566767  | 0.016477105  | 0.003982716 | 0.044200023  | 0.889745554 | 0.9637514   | -0.423043872 | -0.195044831 | 2.168957105 | 24.67464805 | 0.0233954 |
| 10601854 | Wbp5          | 1.071563666   | 0.566165788  | 3.98E-006   | 0.000301537  | 0.001504149 | 0.022764444 | 0.505397878  | 0.818864727  | 0.617193368 | 1.892667642 | 0.025348  |
| 10345167 | Gm9443        | -0.593012032  | -0.203895909 | 0.000117636 | 0.0003540464 | 0.085610627 | 0.335130939 | -0.389116124 | -0.39845397  | 0.976564805 | 2.908405748 | 0.0260498 |
| 10467420 | Pdlm1         | 0.591424027   | 0.118727717  | 0.000666338 | 0.012595177  | 0.389406003 | 0.710244673 | 0.47269631   | 0.355075872  | 1.331254381 | 4.981347593 | 0.0262011 |
| 10515282 | Tspan1        | 0.775230912   | 0.361565432  | 1.64E-005   | 0.000822889  | 0.008632022 | 0.079102725 | 0.41366548   | 0.568398172  | 0.727774121 | 2.144095768 | 0.0266745 |
| 10585706 | Cox5a         | 0.943032979   | 0.520083537  | 2.72E-006   | 0.00022456   | 0.00081975  | 0.014683428 | 0.422949442  | 0.731558258  | 0.578148681 | 1.813233668 | 0.0272403 |
| 10489078 | Dsn1          | 0.70764774    | 0.295238462  | 4.50E-005   | 0.001786616  | 0.026747188 | 0.167205751 | 0.412409278  | 0.501443101  | 0.822444814 | 2.3968684   | 0.0283364 |
| 10419323 | Dlgap5        | 1.275571169   | 0.803481177  | 3.58E-007   | 5.29E-005    | 5.01E-005   | 0.001895716 | 0.472089992  | 1.039526173  | 0.454139592 | 1.587555757 | 0.0287162 |
| 10368041 | 3110003A17Rik | 0.814729043   | 0.368576116  | 2.51E-005   | 0.001156322  | 0.013106509 | 0.105436794 | 0.446152927  | 0.591652579  | 0.75407924  | 2.210477044 | 0.0288064 |
| 10405994 | Med10         | 0.545893061   | 0.173922231  | 0.000202126 | 0.00530012   | 0.128272995 | 0.415354011 | 0.37197083   | 0.359907646  | 1.033517443 | 3.138719289 | 0.0288218 |
| 10419170 | Txndc16       | 0.528691499   | 0.169331435  | 0.000199004 | 0.005249322  | 0.125841656 | 0.411163905 | 0.359360064  | 0.349011467  | 1.029651166 | 3.122228895 | 0.0289201 |
| 10353034 | Snord87       | 1.040072029   | 0.516570068  | 1.07E-005   | 0.000619497  | 0.004512683 | 0.049693293 | 0.523501961  | 0.778321048  | 0.672604143 | 2.013419078 | 0.0289862 |
| 10576152 | Trappc2l      | 0.509039994   | 0.09799415   | 0.000919448 | 0.015956992  | 0.426766339 | 0.738007033 | 0.411045844  | 0.303517072  | 1.354275859 | 5.194595721 | 0.0300886 |
| 10373036 | Os9           | 0.409297299   | 0.033653445  | 0.002460481 | 0.031864594  | 0.76334312  | 0.917242744 | 0.375643854  | 0.221475372  | 1.69609763  | 12.16212178 | 0.0304483 |
| 10563939 |               | 0.521563324   | 0.088702363  | 0.001169887 | 0.01882674   | 0.494542176 | 0.784347555 | 0.432860961  | 0.305132843  | 1.418598393 | 5.879925949 | 0.0305476 |
| 10366814 | Cdk4          | 0.591183676   | 0.133411053  | 0.00068295  | 0.012795587  | 0.336502264 | 0.666770119 | 0.457772623  | 0.362297364  | 1.263527335 | 4.431294589 | 0.0307769 |
| 10362674 | Rnu3a         | 1.233004366   | 0.50097056   | 6.47E-005   | 0.002324459  | 0.035727222 | 0.201136924 | 0.732033806  | 0.866987463  | 0.844341858 | 2.461231185 | 0.0308847 |
| 10427667 |               | -0.608357667  | -0.14798199  | 0.000575574 | 0.011426009  | 0.291963921 | 0.626389997 | -0.460375677 | -0.378169828 | 1.217378127 | 4.111025051 | 0.0310776 |
| 10561679 | Psmd8         | 0.908076717   | 0.506680928  | 3.51E-006   | 0.000277191  | 0.000900375 | 0.015794501 | 0.401395789  | 0.707378822  | 0.56744106  | 1.792206233 | 0.0324183 |
| 10369252 | Sept10        | 0.42395969    | 0.072913188  | 0.001322234 | 0.020432445  | 0.496542122 | 0.785670642 | 0.351046502  | 0.248436439  | 1.413023402 | 5.814581726 | 0.0331587 |
| 10562576 | Plekhf1       | 0.690846924   | 0.259171904  | 0.000123257 | 0.003666007  | 0.064525308 | 0.285459427 | 0.43167502   | 0.475009414  | 0.908771504 | 2.665593425 | 0.0333763 |
| 10576657 |               | -0.403059828  | -0.020928834 | 0.003621486 | 0.04130984   | 0.857085664 | 0.951748856 | -0.382130995 | -0.211994331 | 1.802552894 | 19.25859017 | 0.0337706 |
| 10547752 | Gm5077        | 0.502019437   | 0.046650261  | 0.00268417  | 0.03382828   | 0.736877205 | 0.905140228 | 0.455369176  | 0.274334849  | 1.659902768 | 10.76134241 | 0.0339142 |
| 10445153 | Olf1r21       | 0.498825552   | 0.083799278  | 0.001503156 | 0.022310191  | 0.513423879 | 0.794894996 | 0.415026274  | 0.291312415  | 1.424677606 | 5.95262351  | 0.0349776 |
| 10440783 | Edn1          | -0.571853123  | -0.210574542 | 0.000153587 | 0.004327417  | 0.074985087 | 0.311331189 | -0.391278582 | -0.391213833 | 0.923481103 | 2.715680245 | 0.0353351 |
| 10491780 | Hspa4l        | -0.572974306  | -0.130933889 | 0.000878325 | 0.015505404  | 0.34520158  | 0.674758709 | -0.442040417 | -0.351954098 | 1.255960421 | 4.376058096 | 0.03595   |
| 10430425 | Lgals2        | -0.425011174  | -0.048251869 | 0.002549849 | 0.032659438  | 0.679600082 | 0.882423876 | -0.376759484 | -0.236631431 | 1.592178529 | 8.808213356 | 0.0363372 |
| 10369885 | Cisd1         | 0.502703646   | 0.147119426  | 0.000443347 | 0.009420385  | 0.195893555 | 0.517399794 | 0.35558422   | 0.324911536  | 1.094403184 | 3.416976659 | 0.0365114 |
| 10490047 | AY702102      | -0.4112293537 | -0.073399144 | 0.001504298 | 0.022310191  | 0.489082649 | 0.781922979 | -0.338894392 | -0.24284634  | 1.395509572 | 5.617143655 | 0.0368937 |
| 10575733 | Cenpn         | 0.855274111   | 0.496358725  | 2.76E-006   | 0.000226781  | 0.00054587  | 0.010912296 | 0.358915387  | 0.675816418  | 0.531084148 | 1.723096762 | 0.0369543 |
| 10540028 | Klf15         | -0.612949307  | -0.272589768 | 5.06E-005   | 0.001947039  | 0.02078679  | 0.141992793 | -0.340359539 | -0.442769537 | 0.768705863 | 2.24861451  | 0.0371227 |
| 10459844 | Haus1         | 0.472040828   | 0.127606151  | 0.000605652 | 0.011821953  | 0.246644015 | 0.580317607 | 0.344434677  | 0.299823489  | 1.148791502 | 3.699201205 | 0.0375178 |
| 10434698 | Fetub         | 0.789221792   | 0.422377268  | 9.03E-006   | 0.000543073  | 0.002410089 | 0.032116109 | 0.366844524  | 0.60579953   | 0.605554322 | 1.868523359 | 0.0383573 |
| 10451547 | Gm16494       | 1.214934014   | 0.750691755  | 1.11E-006   | 0.000120569  | 0.00015442  | 0.004346108 | 0.464242259  | 0.982812885  | 0.472360778 | 1.618419285 | 0.038851  |
| 10600781 | Gm4990        | -0.457942116  | -0.125096929 | 0.000636102 | 0.0121796    | 0.244630142 | 0.577928126 | -0.332845188 | -0.291519523 | 1.141759511 | 3.660698312 | 0.0391372 |
| 10606868 | Bex1          | 0.77433005    | 0.152522532  | 0.001414201 | 0.021395099  | 0.44135383  | 0.748260905 | 0.621807518  | 0.463426291  | 1.34176142  | 5.076824    | 0.0393721 |
| 10406581 | Dhfr          | 0.899144507   | 0.560750187  | 9.76E-007   | 0.000109292  | 0.000127292 | 0.003781622 | 0.338394321  | 0.729947347  | 0.463587301 | 1.603467156 | 0.0394228 |
| 10550217 | Crxos1        | -0.442577243  | -0.085251021 | 0.001498933 | 0.022304116  | 0.454672287 | 0.757843751 | -0.357326221 | -0.263914132 | 1.353948796 | 5.19145971  | 0.0397551 |
| 10358191 | Camsap11      | -0.467298096  | -0.129057381 | 0.000639381 | 0.012183844  | 0.240024683 | 0.572207074 | -0.338240715 | -0.298177738 | 1.134359383 | 3.620855262 | 0.0399376 |
| 10376887 | Snord49a      | 0.578327203   | 0.114313547  | 0.001443655 | 0.021720824  | 0.441008079 | 0.747969753 | 0.464013656  | 0.346320375  | 1.339839322 | 5.05913096  | 0.0399733 |
| 10529799 | Cpeb2         | -0.409016567  | -0.04522926  | 0.00307872  | 0.036996526  | 0.695239762 | 0.889521408 | -0.363787307 | -0.227122913 | 1.601719975 | 9.043185063 | 0.0401902 |
| 10414711 |               | 0.753546032   | 0.368375412  | 2.89E-005   | 0.001266255  | 0.009118496 | 0.081892757 | 0.38517062   | 0.560960722  | 0.686626719 | 2.045592642 | 0.0414776 |
| 10374790 | LOC100046559  | -0.619611861  | -0.254850677 | 0.00011563  | 0.003495865  | 0.040021824 | 0.227996806 | -0.364761184 | -0.437231269 | 0.834252281 | 2.431274138 | 0.041889  |
| 10501895 | Myoz2         | -1.589242411  | -1.114663286 | 8.60E-008   | 1.74E-005    | 4.74E-006   | 0.0003369   | -0.474579125 | -1.351952849 | 0.351032305 | 1.425760075 | 0.0429651 |
| 10399874 | Bcap29        | 1.127659137   | 0.772630623  | 1.67E-007   | 2.95E-005    | 1.10E-005   | 0.000627574 | 0.355028513  | 0.95014488   | 0.37365724  | 1.459506137 | 0.0436125 |
| 10427910 | Fam105b       | 0.612750826   | 0.218444161  | 0.000282739 | 0.006713541  | 0.103646319 | 0.370683255 | 0.394306665  | 0.415597493  | 0.948770557 | 2.805068461 | 0.0436694 |
| 10470182 | Bmyc          | -0.395266728  | -0.060455174 | 0.002521811 | 0.032388126  | 0.578385438 | 0.831332497 | -0.334811554 | -0.227860951 | 1.469367842 | 6.538178646 | 0.0437601 |
| 10516778 | Zcchc17       | 0.426697507   | 0.053825786  | 0.003154719 | 0.037593005  | 0.65636885  | 0.869737011 | 0.372871721  | 0.240261647  | 1.551940255 | 7.927380888 | 0.0438991 |
| 10526217 | Rfc2          | 0.526064762   | 0.128512112  | 0.001088629 | 0.017900663  | 0.326786041 | 0.656950509 | 0.39755265   | 0.327288437  | 1.214685901 | 4.093503355 | 0.0440292 |
| 10445528 | BC040756      | -0.478732412  | -0.117045531 | 0.001087234 | 0.017889175  | 0.326326385 | 0.656439724 | -0.361686881 | -0.297888972 | 1.214166738 | 4.090138321 | 0.0440476 |
| 10586448 | 2810417H13Rik | 0.978586853   | 0.539468975  | 9.12E-006   | 0.000544224  | 0.001957051 | 0.027600873 | 0.439117878  | 0.759027914  | 0.578526652 | 1.813981708 | 0.044616  |
| 10502232 | Aimp1         | 0.534360923   | 0.137112707  | 0.0009899   | 0.016815857  | 0.298315263 | 0.631624502 | 0.397248216  | 0.335736815  | 1.183213156 | 3.897238528 | 0.0448098 |
| 10415606 |               | 0.429252926   | 0.033790868  | 0.004773158 | 0.049884946  | 0.7935173   | 0.931432097 | 0.395462058  | 0.231521897  | 1.708097863 | 12.70322274 | 0.0454953 |
| 10553635 | Nipa1         | -0.375112412  | -0.047151054 | 0.003533388 | 0.040656533  | 0.662718886 | 0.873236243 | -0.327961358 | -0.211131733 | 1.553349435 | 7.955546719 | 0.0468562 |
| 10398173 | Vrk1          | 1.09899477    | 0.770935016  | 1.20E-007   | 2.30E-005    | 6.42E-006   | 0.000420075 | 0.328059754  | 0.934964893  | 0.350879222 | 1.425534899 | 0.0483285 |

Suppl Table 1

|          |                |              |              |             |             |             |             |              |              |             |             |           |
|----------|----------------|--------------|--------------|-------------|-------------|-------------|-------------|--------------|--------------|-------------|-------------|-----------|
| 10562169 | Hamp           | -1.692028628 | -1.167903379 | 1.90E-007   | 3.30E-005   | 1.15E-005   | 0.000641871 | -0.524125249 | -1.429966004 | 0.366529867 | 1.448774495 | 0.048752  |
| 10591072 | Ccdc67         | 0.492655833  | 0.150578663  | 0.000692442 | 0.012898118 | 0.200217669 | 0.52357275  | 0.34207717   | 0.321617248  | 1.06361575  | 3.271750618 | 0.0492895 |
| 10578427 | F11            | -0.455746823 | -0.104284068 | 0.001595707 | 0.02319287  | 0.380432195 | 0.702615448 | -0.351462755 | -0.280015446 | 1.255154886 | 4.370243993 | 0.0496386 |
| 10538808 |                | -0.459544284 | -0.082153185 | 0.00255956  | 0.032734826 | 0.517754996 | 0.797951957 | -0.377391099 | -0.270848734 | 1.393364825 | 5.593748874 | 0.0500028 |
| 10578413 | Gm5346         | -0.512387659 | -0.090717838 | 0.00264324  | 0.033464917 | 0.523587451 | 0.801180772 | -0.421669821 | -0.301552749 | 1.398328559 | 5.648146695 | 0.0504877 |
| 10585874 | Hexa           | 1.310312558  | 0.915671057  | 1.54E-007   | 2.79E-005   | 8.37E-006   | 0.000509215 | 0.394641502  | 1.112991808  | 0.354577185 | 1.430986104 | 0.0507745 |
| 10475708 | Blvra          | 0.506145683  | 0.143331593  | 0.000964201 | 0.016513616 | 0.251666542 | 0.586102147 | 0.36281409   | 0.324738638  | 1.117249528 | 3.531291829 | 0.0511608 |
| 10466903 | 443040218Rik   | -0.429296131 | -0.118429674 | 0.001072266 | 0.017739825 | 0.269668465 | 0.606010344 | -0.310866457 | -0.273862902 | 1.135117078 | 3.624903439 | 0.0518407 |
| 10371082 | Itgb1bp3       | -0.450731159 | -0.11984672  | 0.001205155 | 0.019213622 | 0.293509724 | 0.62746555  | -0.330884439 | -0.28528894  | 1.159822177 | 3.76089691  | 0.0521159 |
| 10519988 | Al847670       | 0.396102778  | 0.059912116  | 0.003485478 | 0.040281521 | 0.599583248 | 0.841173087 | 0.336190662  | 0.228007447  | 1.474472286 | 6.61139688  | 0.0522874 |
| 10545215 | Igk-V28        | 1.012979026  | 0.63606014   | 1.87E-006   | 0.000177222 | 0.000203727 | 0.005325106 | 0.376918887  | 0.824519583  | 0.45713758  | 1.592583725 | 0.0523876 |
| 10456001 | Rps14          | 0.587560941  | 0.110662173  | 0.002564398 | 0.032764052 | 0.496094237 | 0.785500393 | 0.476898768  | 0.349111557  | 1.366035464 | 5.309501199 | 0.0524104 |
| 10536324 | Asb4           | 0.365862334  | 0.046147277  | 0.004325571 | 0.046425458 | 0.671001273 | 0.877171413 | 0.319715057  | 0.206004805  | 1.551978635 | 7.928145657 | 0.0528876 |
| 10360076 | Ndufs2         | 0.503354343  | 0.132314502  | 0.001294148 | 0.020112497 | 0.303101364 | 0.636818025 | 0.371039841  | 0.317834422  | 1.167399801 | 3.804226573 | 0.0531679 |
| 10375561 | Olfr1387       | -0.424500666 | -0.055152686 | 0.004271447 | 0.046086377 | 0.661190172 | 0.87236861  | -0.36934798  | -0.239826676 | 1.540062127 | 7.696826765 | 0.053392  |
| 10356145 | Slc19a3        | -1.040632355 | -0.573700092 | 1.49E-005   | 0.000766541 | 0.002750132 | 0.035119592 | -0.466932263 | -0.807166223 | 0.578483402 | 1.813896091 | 0.053881  |
| 10571567 | Sorbs2         | -0.743883377 | -0.311367593 | 0.000183377 | 0.004959869 | 0.050249457 | 0.247487675 | -0.432515784 | -0.527625485 | 0.819740132 | 2.389084139 | 0.0538907 |
| 10525103 | lqcd           | -0.355090149 | -0.045335435 | 0.004563858 | 0.048168216 | 0.669765109 | 0.876572429 | -0.309754714 | -0.200212792 | 1.547127492 | 7.832507889 | 0.0549347 |
| 10463981 | Rbm20          | -0.442146471 | -0.061261092 | 0.004560716 | 0.045909007 | 0.639637343 | 0.860871716 | -0.380885379 | -0.251703781 | 1.513228674 | 7.217410898 | 0.0549928 |
| 10356999 | Prdx2          | 0.770567662  | 0.29290787   | 0.000351573 | 0.007902069 | 0.091872211 | 0.348275869 | 0.477659791  | 0.531737766  | 0.898299541 | 2.63075096  | 0.0559461 |
| 10598612 | Otc            | -0.380486587 | -0.069503413 | 0.003088984 | 0.037085141 | 0.519900124 | 0.799532472 | -0.310983175 | -0.224995    | 1.382178157 | 5.474358336 | 0.056505  |
| 10497048 |                | 0.435800234  | 0.124276197  | 0.001154748 | 0.018653282 | 0.258918712 | 0.59359486  | 0.311524037  | 0.280038216  | 1.112434015 | 3.506707185 | 0.0565217 |
| 10607841 | Tceanc         | 0.422320594  | 0.098922802  | 0.001970655 | 0.027078568 | 0.382779553 | 0.704447493 | 0.323397792  | 0.260621698  | 1.240870558 | 4.269193602 | 0.0569624 |
| 10582190 | Gins2          | 0.440238794  | 0.130301793  | 0.001058209 | 0.017580654 | 0.237190369 | 0.569376319 | 0.309937001  | 0.285270293  | 1.086467847 | 3.378608881 | 0.0573924 |
| 10355105 | AF362573       | 0.682374658  | 0.360727138  | 2.91E-005   | 0.001270065 | 0.005672399 | 0.058356364 | 0.32164752   | 0.521550898  | 0.616713578 | 1.891664327 | 0.0574382 |
| 10428089 | Nipal2         | -0.565484394 | -0.213873242 | 0.000386536 | 0.00851639  | 0.096620084 | 0.357303066 | -0.351611152 | -0.389678818 | 0.902310148 | 2.644016561 | 0.0576638 |
| 10420616 | Sgcg           | -0.560604246 | -0.227825594 | 0.000263848 | 0.006379068 | 0.06553734  | 0.288340141 | -0.332778652 | -0.39421492  | 0.844155397 | 2.460672817 | 0.058179  |
| 10569069 | Rps9           | 0.618158537  | 0.19249091   | 0.000959171 | 0.016464261 | 0.209569272 | 0.535672583 | 0.425667627  | 0.405324723  | 1.050189151 | 3.211364827 | 0.0595082 |
| 10461156 | Shhg1          | 0.936082637  | 0.56073988   | 6.14E-006   | 0.000411501 | 0.000774269 | 0.014055116 | 0.375342757  | 0.748411258  | 0.501519388 | 1.66937054  | 0.0598416 |
| 10583441 | Olfr872        | -1.0726513   | -0.662762454 | 3.96E-006   | 0.000300665 | 0.000426855 | 0.009191701 | -0.409888847 | -0.867706877 | 0.472381697 | 1.618455141 | 0.0614461 |
| 10542555 | MGC7817        | -0.407550569 | -0.107701053 | 0.001708434 | 0.024416523 | 0.317714975 | 0.649085321 | -0.299849516 | -0.257625811 | 1.163895474 | 3.784090838 | 0.0615374 |
| 10510546 | Eno1           | 0.737597666  | 0.372674015  | 5.98E-005   | 0.002210044 | 0.011557069 | 0.096659126 | 0.364923651  | 0.55513584   | 0.657359199 | 1.979203371 | 0.0629948 |
| 10540785 | 6720456B07Rik  | 0.423648617  | 0.07437905   | 0.004020502 | 0.044458324 | 0.551363844 | 0.816296569 | 0.349269567  | 0.249013834  | 1.4026111   | 5.695805696 | 0.063194  |
| 10412100 | Map3k1         | 0.35063308   | 0.058680088  | 0.004422512 | 0.047122053 | 0.575324736 | 0.829999919 | 0.291952992  | 0.204656584  | 1.426550697 | 5.975333267 | 0.0642197 |
| 10568369 | Cox6a2         | -0.602960885 | -0.306514315 | 6.01E-005   | 0.00221467  | 0.011191078 | 0.094677846 | -0.29644657  | -0.4547376   | 0.651906879 | 1.967154077 | 0.0645517 |
| 10608286 |                | -0.469644568 | -0.104275582 | 0.002822387 | 0.034963813 | 0.430074001 | 0.740355654 | -0.365368987 | -0.286960075 | 1.273239793 | 4.503878666 | 0.0646817 |
| 10403765 | Vps41          | 0.606800163  | 0.235048398  | 0.000449018 | 0.009525114 | 0.094754778 | 0.353872494 | 0.371751765  | 0.420924281  | 0.883179665 | 2.581596676 | 0.0650092 |
| 10571114 | Erlin2         | 0.474929203  | 0.164112489  | 0.00077459  | 0.01410305  | 0.156469545 | 0.464629835 | 0.310816714  | 0.319520846  | 0.972758797 | 2.893924803 | 0.0651264 |
| 10605612 | Gm7197         | -0.454221864 | -0.109852227 | 0.002397514 | 0.031285913 | 0.380517323 | 0.70263758  | -0.344369636 | -0.282037045 | 1.221008523 | 4.134844369 | 0.0653351 |
| 10441811 |                | 0.522717908  | 0.137287836  | 0.001969043 | 0.027070909 | 0.329535359 | 0.659996379 | 0.385430073  | 0.330002872  | 1.167959752 | 3.807459745 | 0.0654821 |
| 10597648 | Myd88          | 0.553010685  | 0.259605368  | 0.000131736 | 0.00385134  | 0.026116903 | 0.164507651 | 0.293405317  | 0.406308027  | 0.722125328 | 2.130197418 | 0.0662186 |
| 10502823 | Dnajb4         | -0.430456183 | -0.077248586 | 0.004252285 | 0.046066063 | 0.546039995 | 0.813120299 | -0.353207598 | -0.253852385 | 1.391389719 | 5.572350356 | 0.0662753 |
| 10561552 | Eif3k          | 0.461823578  | 0.132140922  | 0.001589721 | 0.023145183 | 0.27648685  | 0.612078008 | 0.329682656  | 0.29698225   | 1.110108956 | 3.494932301 | 0.0663141 |
| 10561306 | Pld3           | 0.760228437  | 0.391943587  | 5.80E-005   | 0.002162348 | 0.010112582 | 0.088262019 | 0.36828485   | 0.576086012  | 0.639287957 | 1.939637391 | 0.0672075 |
| 10551282 | LOC100047728   | -0.489391786 | -0.13857205  | 0.001748728 | 0.024799095 | 0.287169542 | 0.621821141 | -0.350819736 | -0.313981918 | 1.117324647 | 3.531677457 | 0.0683868 |
| 10474977 | 1500003C003Rik | 0.7647258    | 0.319041546  | 0.000345501 | 0.007799758 | 0.066657596 | 0.291079817 | 0.445684254  | 0.541883673  | 0.822472195 | 2.396947387 | 0.0696361 |
| 10591118 | Fat3           | -1.131680364 | -0.734656227 | 2.43E-006   | 0.000213242 | 0.000187193 | 0.005015534 | -0.397024137 | -0.933168296 | 0.425458236 | 1.540421659 | 0.0711226 |
| 10444306 | H2-Eb2         | 0.480606159  | 0.1536249    | 0.001299816 | 0.020183706 | 0.215113947 | 0.542284894 | 0.326981259  | 0.31711553   | 1.031110837 | 3.1284392   | 0.0715753 |
| 10589327 | Ucn2           | -0.412858638 | -0.123473235 | 0.001659398 | 0.023887048 | 0.258933268 | 0.59359486  | -0.289385403 | -0.268165937 | 1.079128119 | 3.343709568 | 0.0721978 |
| 10551393 | Akt2           | 0.746890125  | 0.410056107  | 3.52E-005   | 0.001476842 | 0.005025997 | 0.053730649 | 0.336834017  | 0.578473116  | 0.582281195 | 1.821433973 | 0.0722465 |
| 10544436 | Olfr458        | -0.488671512 | -0.147563913 | 0.001660219 | 0.023887048 | 0.254597873 | 0.589165002 | -0.341107599 | -0.318117713 | 1.072268488 | 3.311592253 | 0.0732623 |
| 10539873 | Gata2          | -0.495593604 | -0.186676784 | 0.000687181 | 0.012828042 | 0.119867429 | 0.401973823 | -0.30891682  | -0.341135194 | 0.90555541  | 2.65482185  | 0.0733228 |
| 10427083 | Eif4b          | 0.457105472  | 0.157423328  | 0.001076117 | 0.017759497 | 0.173842025 | 0.489757116 | 0.299682145  | 0.3072644    | 0.975323352 | 2.903670499 | 0.074781  |
| 10492689 | Pdgfc          | 1.058623313  | 0.752042145  | 3.32E-007   | 4.99E-005   | 1.40E-005   | 0.000734193 | 0.306581167  | 0.905332729  | 0.338639218 | 1.407664875 | 0.0748133 |
| 10478983 | 2410001C21Rik  | 0.394735799  | 0.08843405   | 0.00371657  | 0.042099263 | 0.443933742 | 0.75079998  | 0.306301749  | 0.241584924  | 1.267884368 | 4.463617806 | 0.0751487 |
| 10413559 | Rft1           | 0.441437078  | 0.153473387  | 0.001049508 | 0.017506811 | 0.16879947  | 0.483019574 | 0.287963691  | 0.297455233  | 0.968090855 | 2.876310255 | 0.0752468 |

## Suppl Table 1

|          |               |              |              |             |             |             |             |              |              |             |             |           |
|----------|---------------|--------------|--------------|-------------|-------------|-------------|-------------|--------------|--------------|-------------|-------------|-----------|
| 10421444 | Npm2          | -0.466482819 | -0.157411014 | 0.001252382 | 0.019685327 | 0.190122868 | 0.510475237 | -0.309071804 | -0.311946917 | 0.990783329 | 2.963469999 | 0.0771226 |
| 10472155 | Kcnj3         | -0.544730505 | -0.209459095 | 0.00070082  | 0.013015078 | 0.113815848 | 0.390630602 | -0.335271409 | -0.3770948   | 0.889090514 | 2.600653385 | 0.0772151 |
| 10556790 | 2610020H08Rik | 0.466609705  | 0.135174918  | 0.002156878 | 0.028985256 | 0.289820227 | 0.624243147 | 0.331434787  | 0.300892311  | 1.101506336 | 3.45189561  | 0.0779573 |
| 10427665 |               | -0.733284666 | -0.369696185 | 0.000109075 | 0.003360928 | 0.016513589 | 0.12293237  | -0.363588481 | -0.551490426 | 0.659283397 | 1.983479126 | 0.0781021 |
| 10425092 | Cyth4         | 0.84926299   | 0.54155058   | 4.65E-006   | 0.000339806 | 0.000370297 | 0.008272398 | 0.30771241   | 0.695406785  | 0.442492677 | 1.568206223 | 0.0781597 |
| 10382136 | 1810010H24Rik | -1.198622323 | -0.842031267 | 5.32E-007   | 7.18E-005   | 2.40E-005   | 0.001082707 | -0.356591057 | -1.020326795 | 0.349487104 | 1.423489092 | 0.0785431 |
| 10365974 | Dcn           | -0.460925955 | -0.106321138 | 0.003875168 | 0.0433165   | 0.43365374  | 0.742430854 | -0.354604818 | -0.283623547 | 1.25026579  | 4.335224068 | 0.07902   |
| 10473125 | Itga4         | 0.734684705  | 0.397646615  | 5.54E-005   | 0.002078259 | 0.007358804 | 0.070558752 | 0.33703809   | 0.56616566   | 0.595299421 | 1.84758194  | 0.0798265 |
| 10446619 | Myom1         | -0.904606185 | -0.627906006 | 7.81E-007   | 9.59E-005   | 3.78E-005   | 0.001508533 | -0.276700179 | -0.766256095 | 0.36110666  | 1.440671337 | 0.080157  |
| 10525657 | Denr          | 0.398736649  | 0.119162367  | 0.002115212 | 0.028593681 | 0.274278782 | 0.61055662  | 0.279574282  | 0.258949508  | 1.079647861 | 3.346162549 | 0.0806986 |
| 10473109 | Gm14461       | 0.786829807  | 0.44636062   | 3.24E-005   | 0.001378449 | 0.003830718 | 0.044572469 | 0.340469187  | 0.616595214  | 0.552176176 | 1.762767081 | 0.0808563 |
| 10596148 | Trf           | 0.616411755  | 0.322242756  | 8.53E-005   | 0.002830995 | 0.011752295 | 0.097769455 | 0.294168999  | 0.469327256  | 0.626788655 | 1.912880099 | 0.0813152 |
| 10399924 | Pik3cg        | 0.805401486  | 0.51776378   | 4.56E-006   | 0.000334608 | 0.000340311 | 0.007742274 | 0.287637706  | 0.661582633  | 0.434772153 | 1.555538484 | 0.0815684 |
| 10572146 | Atp6v1b2      | 0.832796241  | 0.500213974  | 1.49E-005   | 0.000766541 | 0.00146596  | 0.022357849 | 0.332582267  | 0.666505108  | 0.498994326 | 1.66488     | 0.0816933 |
| 10520521 | Cenpa         | 0.555106113  | 0.285334919  | 0.00010251  | 0.003200992 | 0.014373941 | 0.112040788 | 0.269771195  | 0.420220516  | 0.641975306 | 1.945454541 | 0.0816976 |
| 10418848 | Wdfy4         | 0.654747698  | 0.3613103    | 4.76E-005   | 0.001855733 | 0.005923113 | 0.060021498 | 0.293437398  | 0.508028999  | 0.577599702 | 1.812147892 | 0.0819336 |
| 10550025 | Gm6946        | -0.531737043 | -0.124013123 | 0.004139375 | 0.045475843 | 0.433130675 | 0.742212308 | -0.407723919 | -0.327875083 | 1.243534323 | 4.287748172 | 0.0825707 |
| 10594248 | Rplp1         | 0.639243903  | 0.260587737  | 0.000607022 | 0.011830703 | 0.090392889 | 0.345643727 | 0.378656166  | 0.44991582   | 0.841615586 | 2.453085135 | 0.0827752 |
| 10438405 | Igl-V1        | 0.846845651  | 0.52609862   | 9.22E-006   | 0.0005491   | 0.000787109 | 0.007407223 | 0.320747031  | 0.686472136  | 0.467239695 | 1.609670922 | 0.0836209 |
| 10583100 | Mmp8          | 1.277877574  | 0.743520732  | 2.58E-005   | 0.001176606 | 0.002746218 | 0.03510454  | 0.534356842  | 1.010699153  | 0.528700198 | 1.718684522 | 0.0839167 |
| 10378802 | Blimh         | 0.623903328  | 0.332027587  | 7.75E-005   | 0.002651215 | 0.010018605 | 0.087657063 | 0.291875741  | 0.477965458  | 0.610662835 | 1.879070755 | 0.0839951 |
| 10571696 | Casp3         | 0.735555321  | 0.422073784  | 3.13E-005   | 0.001347481 | 0.003463886 | 0.041566637 | 0.313481538  | 0.578814553  | 0.541592357 | 1.742717387 | 0.0840777 |
| 10546113 | Sec61a1       | 0.874884271  | 0.538729848  | 1.09E-005   | 0.000621531 | 0.000959998 | 0.01651799  | 0.336154423  | 0.706807059  | 0.475595735 | 1.623975865 | 0.0840918 |
| 10434747 | Adipoq        | -0.685762713 | -0.336429922 | 0.00017533  | 0.004818382 | 0.02457141  | 0.158633975 | -0.349332792 | -0.511096317 | 0.683496984 | 2.038352326 | 0.0847784 |
| 10592084 | St3gal4       | 0.977056769  | 0.687196961  | 6.99E-007   | 8.83E-005   | 0.001273293 | 0.289859807 | 0.832126865  | 0.348336077  | 1.421800188 | 0.0858351   | 0.0858351 |
| 10553301 | Ldha          | 0.789826517  | 0.467806271  | 2.16E-005   | 0.001029451 | 0.002132723 | 0.029368419 | 0.322020246  | 0.628816394  | 0.512105359 | 1.688362395 | 0.0860674 |
| 10366593 |               | 0.43383356   | 0.109082589  | 0.003849251 | 0.043145224 | 0.394006283 | 0.714181431 | 0.324750971  | 0.271458074  | 1.196320913 | 3.977110971 | 0.0862241 |
| 10557069 | Mettl9        | 0.465357359  | 0.140137943  | 0.002389532 | 0.031245297 | 0.278529719 | 0.614201102 | 0.325219416  | 0.302747651  | 1.074226058 | 3.320709214 | 0.0862462 |
| 10531869 | Mapk10        | -0.643596137 | -0.335664734 | 0.000104767 | 0.003247773 | 0.013448831 | 0.107239697 | -0.307931403 | -0.489630436 | 0.628905763 | 1.917377882 | 0.0866539 |
| 10481585 | 2900010J23Rik | 0.40831048   | 0.138692228  | 0.001594251 | 0.02318483  | 0.200658442 | 0.524277737 | 0.269618251  | 0.273501354  | 0.985802256 | 2.944004038 | 0.0866669 |
| 10574033 | Nup93         | 0.712532739  | 0.434785562  | 1.42E-005   | 0.000750411 | 0.001259537 | 0.020162474 | 0.277747177  | 0.573659151  | 0.484167605 | 1.638814168 | 0.0872582 |
| 10567150 | Dnahc3        | -0.413973211 | -0.124644633 | 0.002462909 | 0.031879957 | 0.280545069 | 0.615999215 | -0.289328578 | -0.269308922 | 1.074337144 | 3.321227728 | 0.0874186 |
| 10572757 | Rab8a         | 0.581586774  | 0.247738757  | 0.000560674 | 0.01123449  | 0.075729082 | 0.312761719 | 0.333848017  | 0.414662765  | 0.805107293 | 2.347580897 | 0.0888706 |
| 10587262 | Kihl31        | -0.840988333 | -0.418307856 | 0.000180046 | 0.004895578 | 0.023314706 | 0.153062977 | -0.422680477 | -0.629648094 | 0.671296365 | 2.010453118 | 0.0894    |
| 10532164 | Atp5k         | 0.494874143  | 0.16770116   | 0.001737039 | 0.024701565 | 0.206532258 | 0.531715822 | 0.327172983  | 0.331287651  | 0.987579771 | 2.950928564 | 0.0895898 |
| 10488387 | Napb          | -0.376689717 | -0.095744452 | 0.004137795 | 0.045475843 | 0.393992245 | 0.714181431 | -0.280945265 | -0.236217085 | 1.189352012 | 3.93432422  | 0.0903302 |
| 10462091 | Klf9          | -0.561086108 | -0.284799512 | 0.000160442 | 0.004481202 | 0.019793504 | 0.137610956 | -0.276286595 | -0.42294281  | 0.653248119 | 1.970109088 | 0.0916393 |
| 10508436 | Sync          | -0.413686238 | -0.12612453  | 0.002657417 | 0.033568201 | 0.279721852 | 0.615138837 | -0.287561709 | -0.269905384 | 1.06541672  | 3.27998241  | 0.0920497 |
| 10508151 | Clsn1         | 0.977600924  | 0.686903076  | 9.79E-007   | 0.000109292 | 4.09E-005   | 0.001613553 | 0.290697848  | 0.832252     | 0.349290657 | 1.423200679 | 0.0937733 |
| 10469782 | Gm13410       | -0.42045366  | -0.128151224 | 0.002782291 | 0.034617475 | 0.282848295 | 0.617736075 | -0.292302436 | -0.274302442 | 1.065620976 | 3.280918018 | 0.0939224 |
| 10466624 | Aldh1a7       | 0.443007164  | 0.115407395  | 0.004425092 | 0.047129984 | 0.387314577 | 0.708353953 | 0.32759977   | 0.279207279  | 1.173321019 | 3.838637601 | 0.095796  |
| 10350594 | Ivns1abp      | 0.506807663  | 0.183737541  | 0.001615376 | 0.023412461 | 0.174539255 | 0.490624398 | 0.323070121  | 0.345272602  | 0.935695793 | 2.75832396  | 0.0974411 |
| 10502778 | Gm10287       | -0.767946622 | -0.442640067 | 4.76E-005   | 0.001855733 | 0.00446836  | 0.049373163 | -0.325306555 | -0.605293345 | 0.5374362   | 1.734923427 | 0.0980981 |
| 10374228 | Gm11992       | -0.438009288 | -0.13699908  | 0.002864165 | 0.035327908 | 0.272881085 | 0.6090285   | -0.301010208 | -0.287504184 | 1.046976789 | 3.197169549 | 0.0986111 |
| 10360920 | Tgfb2         | -0.505703728 | -0.232014004 | 0.000453656 | 0.009576028 | 0.052654542 | 0.254622604 | -0.273689724 | -0.368858866 | 0.741990363 | 2.17962588  | 0.0987536 |
| 10359504 | Dnm3os        | 0.405125171  | 0.108912502  | 0.004383944 | 0.046840895 | 0.372115947 | 0.696832936 | 0.296212669  | 0.257018836  | 1.15249401  | 3.719730654 | 0.0987769 |
| 10565862 | Pold3         | 0.789230803  | 0.477413044  | 2.48E-005   | 0.001146119 | 0.002021322 | 0.028228131 | 0.311817759  | 0.633321924  | 0.492352699 | 1.653140425 | 0.0992606 |
| 10346109 | Dnahc7b       | -0.469807798 | -0.154270896 | 0.002488645 | 0.032133335 | 0.24187802  | 0.574544237 | -0.315536902 | -0.312039347 | 1.011208699 | 3.045343032 | 0.0995395 |
| 10375234 | Nudcd2        | 0.540585047  | 0.18036338   | 0.002369246 | 0.031043285 | 0.231752074 | 0.562308007 | 0.360221667  | 0.360474213  | 0.999299404 | 2.99719958  | 0.0998457 |
| 10351037 | Gas5          | 1.132956775  | 0.53446236   | 0.000381877 | 0.008435481 | 0.043426    | 0.226142945 | 0.598494415  | 0.833709568  | 1.17869193  | 2.11980648  | 0.0999554 |
| 10434396 | Abcf3         | 0.410957205  | 0.111720053  | 0.004396735 | 0.046944841 | 0.367145564 | 0.692590211 | 0.299237151  | 0.261338629  | 1.145016917 | 3.678455143 | 0.10017   |
| 10567211 | Gm9197        | 0.503109986  | 0.152040647  | 0.003308082 | 0.038986159 | 0.298287845 | 0.631624502 | 0.351069339  | 0.327575316  | 1.07172098  | 3.309049236 | 0.100286  |
| 10347218 |               | 1.532426017  | 0.547416185  | 0.001855418 | 0.025987734 | 0.188140145 | 0.507800342 | 0.985009832  | 1.039921101  | 0.947196697 | 2.799380176 | 0.100581  |
| 10457020 |               | 0.803670911  | 0.392252156  | 0.000300737 | 0.007020476 | 0.03332281  | 0.191752865 | 0.411418755  | 0.597961533  | 0.688035487 | 2.048862955 | 0.101105  |
| 10513320 | Ptgr1         | 0.729129423  | 0.460293259  | 1.35E-005   | 0.000720963 | 0.000925463 | 0.016081915 | 0.268836164  | 0.594711341  | 0.452044791 | 1.584054098 | 0.102091  |
| 10351099 | Tnfrsf18      | -0.412029559 | -0.125240512 | 0.003444126 | 0.04003797  | 0.298323713 | 0.631624502 | -0.286789048 | -0.268635035 | 1.067578721 | 3.289906389 | 0.102875  |

Suppl Table 1

|          |               |              |              |             |             |             |             |              |              |             |              |          |
|----------|---------------|--------------|--------------|-------------|-------------|-------------|-------------|--------------|--------------|-------------|--------------|----------|
| 10554063 | Adamts17      | -0.444258072 | -0.174214156 | 0.001319374 | 0.02040102  | 0.134553736 | 0.427124079 | -0.270043915 | -0.309236114 | 0.87326125  | 2.550068726  | 0.103824 |
| 10483000 | Itgb6         | -0.372596988 | -0.111578144 | 0.003739776 | 0.042268858 | 0.310862993 | 0.643538293 | -0.261018844 | -0.242087566 | 1.078200124 | 3.339336665  | 0.104643 |
| 10437236 | B230307C23Rik | 0.706072026  | 0.316954391  | 0.000625756 | 0.012070876 | 0.066012784 | 0.289544793 | 0.389117635  | 0.511513208  | 0.760718646 | 2.227677061  | 0.10508  |
| 10396645 | Zbtb1         | 0.556554476  | 0.251700903  | 0.000638286 | 0.012182092 | 0.064826797 | 0.286349034 | 0.304853573  | 0.404127689  | 0.754349629 | 2.211173932  | 0.107772 |
| 10599054 | Gm4907        | -0.514433749 | -0.19700344  | 0.001636908 | 0.023671075 | 0.153821008 | 0.460118591 | -0.317430309 | -0.355718595 | 0.892363553 | 2.611293228  | 0.10808  |
| 10392990 | Grb2          | 0.387434052  | 0.120622105  | 0.003592758 | 0.041114094 | 0.290102957 | 0.624485299 | 0.266811947  | 0.254028078  | 1.050324627 | 3.211965599  | 0.108179 |
| 10373454 | Pa2g4         | 0.851624237  | 0.552396241  | 9.98E-006   | 0.000584884 | 0.000588895 | 0.011538745 | 0.299227996  | 0.702010239  | 0.426244489 | 1.541690862  | 0.1082   |
| 10520965 | Yes1          | -0.582002258 | -0.311916768 | 0.000153772 | 0.004327875 | 0.014538885 | 0.112570831 | -0.27008549  | -0.446959513 | 0.604272829 | 1.865889612  | 0.108307 |
| 10495306 | Mybphl        | -0.398856325 | -0.143537529 | 0.002183276 | 0.029248602 | 0.194317928 | 0.515219671 | -0.255318796 | -0.271196927 | 0.941451656 | 2.778759867  | 0.108854 |
| 10376230 | G3bp1         | 0.47671277   | 0.225599011  | 0.000474818 | 0.009924776 | 0.047592345 | 0.239516223 | 0.251113759  | 0.351155891  | 0.715106212 | 2.113097781  | 0.108876 |
| 10520304 | Actr3b        | 0.438372751  | 0.134339682  | 0.003927602 | 0.04379396  | 0.303525509 | 0.637239717 | 0.304033069  | 0.286356216  | 1.061730292 | 3.263166516  | 0.110141 |
| 10472426 | Xirp2         | -0.730587834 | -0.414020521 | 8.77E-005   | 0.002878035 | 0.007451083 | 0.07123069  | -0.316567313 | -0.572304177 | 0.553145207 | 1.764617444  | 0.110908 |
| 10440794 | 2610039C10Rik | 0.464595183  | 0.171224816  | 0.002113222 | 0.028593681 | 0.182624904 | 0.501027792 | 0.293370367  | 0.317909999  | 0.922809498 | 2.713363599  | 0.111803 |
| 10375483 | Gm12176       | 0.887113444  | 0.467334217  | 0.00020528  | 0.005333121 | 0.018824736 | 0.132818397 | 0.419779227  | 0.677223831  | 0.619853007 | 1.898242013  | 0.112326 |
| 10469243 |               | -0.511002412 | -0.178213185 | 0.002674028 | 0.033728228 | 0.219801775 | 0.548233599 | -0.332789227 | -0.344607799 | 0.965704281 | 2.867365907  | 0.112451 |
| 10591129 | Fat3          | -0.67403464  | -0.352423506 | 0.000224443 | 0.005664342 | 0.020467452 | 0.140472531 | -0.321611134 | -0.513229073 | 0.62664247  | 1.912570042  | 0.112549 |
| 10348556 | Ube2f         | 0.804238999  | 0.488069256  | 3.63E-005   | 0.001510611 | 0.002597881 | 0.033814609 | 0.316169743  | 0.646154127  | 0.489310103 | 1.647796884  | 0.112852 |
| 10504458 | Ctla          | 0.727055221  | 0.460033435  | 1.84E-005   | 0.000902974 | 0.001156267 | 0.018823724 | 0.267021786  | 0.593544328  | 0.449876737 | 1.580439954  | 0.114226 |
| 10595664 | Tmed3         | 0.723036387  | 0.388701513  | 0.000175734 | 0.004824315 | 0.015472634 | 0.116912446 | 0.334334873  | 0.55586895   | 0.60146348  | 1.860132677  | 0.114262 |
| 10432152 | Olfir284      | -0.401464454 | -0.120401885 | 0.004556428 | 0.048109578 | 0.323948842 | 0.654328632 | -0.281062569 | -0.260933169 | 1.077143889 | 3.334370169  | 0.114356 |
| 10509992 | Hspb7         | -0.482558119 | -0.223980213 | 0.000636123 | 0.0121796   | 0.058819193 | 0.271026422 | -0.258577905 | -0.353269166 | 0.731957188 | 2.154467626  | 0.114755 |
| 10409786 | 1700013B16Rik | -0.430340597 | -0.128652223 | 0.004660402 | 0.048945895 | 0.327030372 | 0.657287259 | -0.301688373 | -0.27949641  | 1.079399815 | 3.344991525  | 0.115039 |
| 10485635 | Elf3m         | 0.484601477  | 0.19514819   | 0.001546242 | 0.022705344 | 0.132545247 | 0.422735016 | 0.289453286  | 0.339874833  | 0.851646718 | 2.4282348633 | 0.116188 |
| 10605790 | Gm371         | -0.36979709  | -0.129391598 | 0.002866327 | 0.035335936 | 0.222673917 | 0.551432137 | -0.240405491 | -0.249594344 | 0.963184853 | 2.85796833   | 0.116277 |
| 10351119 | Vamp4         | 0.506923196  | 0.216429915  | 0.001143956 | 0.018562892 | 0.100175994 | 0.363755325 | 0.29049328   | 0.361676555  | 0.803185266 | 2.342204843  | 0.116862 |
| 10601424 | Gpr174        | 0.582672395  | 0.272442971  | 0.000636851 | 0.0121796   | 0.057244579 | 0.266990059 | 0.310229423  | 0.427557683  | 0.725584958 | 2.138694906  | 0.116923 |
| 10543785 | AB041803      | -0.601538391 | -0.349928272 | 7.48E-005   | 0.002579057 | 0.005700056 | 0.058501078 | -0.251610118 | -0.475733331 | 0.528888984 | 1.719033409  | 0.116972 |
| 10450731 | H2-9          | -0.460427628 | -0.171741738 | 0.002274762 | 0.0302062   | 0.181873503 | 0.500088814 | -0.28868589  | -0.316084683 | 0.91331819  | 2.680930298  | 0.117488 |
| 10527559 | Polr1d        | 0.506419449  | 0.226200962  | 0.000912557 | 0.015891126 | 0.079028941 | 0.321119971 | 0.280218487  | 0.366310205  | 0.764975922 | 2.22803252   | 0.118945 |
| 10421293 | Ppp3cc        | 0.410724071  | 0.168025796  | 0.001534031 | 0.022591695 | 0.126648944 | 0.412541257 | 0.242698275  | 0.289374933  | 0.838698336 | 2.444410806  | 0.119433 |
| 10427683 | Spef2         | -0.866958238 | -0.477029967 | 0.000158713 | 0.004442569 | 0.012830587 | 0.103956919 | -0.38992827  | -0.671994103 | 0.580255494 | 1.817408332  | 0.119712 |
| 10450920 | AY036118      | 0.689624199  | 0.354257831  | 0.00032155  | 0.007375829 | 0.027330603 | 0.169163714 | 0.335366369  | 0.521941015  | 0.642536914 | 1.946673129  | 0.120149 |
| 10534654 | Znhit1        | 0.359763572  | 0.112069202  | 0.004645597 | 0.04891025  | 0.307667392 | 0.640539104 | 0.24769437   | 0.235916387  | 1.049924395 | 3.210191252  | 0.120916 |
| 10538126 | Gimap4        | 0.426561041  | 0.136189281  | 0.00431364  | 0.046357859 | 0.29105553  | 0.625277315 | 0.29037176   | 0.281375161  | 1.031973679 | 3.13211905   | 0.12095  |
| 10427691 | Spef2         | -0.870190561 | -0.50919369  | 7.77E-005   | 0.00265664  | 0.00563575  | 0.058025842 | -0.360996871 | -0.689692126 | 0.523417417 | 1.708957864  | 0.121113 |
| 10430265 | Elf3d         | 0.604606643  | 0.354290901  | 7.79E-005   | 0.002660249 | 0.005594871 | 0.057743925 | 0.250315742  | 0.479448772  | 0.522090693 | 1.706526024  | 0.121891 |
| 10515352 | Akr1a4        | 0.612832254  | 0.338607624  | 0.000160706 | 0.004483686 | 0.012633521 | 0.102847198 | 0.274224629  | 0.475719939  | 0.576444132 | 1.809859583  | 0.121907 |
| 10440977 | Atp5o         | 0.637165376  | 0.369329203  | 9.13E-005   | 0.002944388 | 0.006657368 | 0.065371585 | 0.267836173  | 0.50324729   | 0.532215828 | 1.725196304  | 0.122411 |
| 10549899 | Zfp418        | -0.465324549 | -0.200068918 | 0.001259505 | 0.019732119 | 0.101845323 | 0.367209687 | -0.265255631 | -0.332696734 | 0.797289555 | 2.325821288  | 0.122831 |
| 10452213 | Gtf2f1        | 0.442191055  | 0.169423017  | 0.002270779 | 0.030184548 | 0.17097477  | 0.485957132 | 0.272768039  | 0.305807036  | 0.891961291 | 2.609982166  | 0.122908 |
| 10447006 | Vit           | -0.439971052 | -0.187954789 | 0.001311845 | 0.020309075 | 0.105504789 | 0.375140924 | -0.252016263 | -0.31396292  | 0.802694354 | 2.340834492  | 0.122995 |
| 10376216 | Slc36a1       | 0.574417962  | 0.305349259  | 0.000250748 | 0.006200573 | 0.020156931 | 0.139232538 | 0.269068703  | 0.439883611  | 0.611681583 | 1.881183417  | 0.123222 |
| 10368052 | Ect2l         | -0.520333018 | -0.234324721 | 0.000959014 | 0.016464261 | 0.078521837 | 0.319883094 | -0.286008298 | -0.377328869 | 0.757981487 | 2.220563912  | 0.123323 |
| 10484425 | 2700094K13Rik | 0.538635633  | 0.263311737  | 0.000547233 | 0.011029904 | 0.044698765 | 0.230156047 | 0.275323895  | 0.400973685  | 0.686638315 | 2.045619531  | 0.124502 |
| 10390691 | Nr1d1         | -0.999040848 | -0.699631539 | 3.15E-006   | 0.000253525 | 0.0001162   | 0.003496634 | -0.299409309 | -0.849336193 | 0.352521548 | 1.427952848  | 0.125102 |
| 10408543 | Mylk4         | -0.599216807 | -0.293552912 | 0.000545897 | 0.011015785 | 0.044256    | 0.228978633 | -0.305663895 | -0.446384859 | 0.684754173 | 2.04125656   | 0.125105 |
| 10546163 | Mcm2          | 0.38390462   | 0.136876806  | 0.003211928 | 0.038133099 | 0.221618788 | 0.550266037 | 0.247027814  | 0.260390713  | 0.948681351 | 2.804745598  | 0.12529  |
| 10482177 | Strbp         | -0.520896682 | -0.263629688 | 0.000424349 | 0.009107173 | 0.03389231  | 0.193838638 | -0.257266993 | -0.392263185 | 0.655853017 | 1.975865029  | 0.125903 |
| 10588903 | Usp4          | 0.375042818  | 0.123472666  | 0.00433512  | 0.046480307 | 0.277273069 | 0.612810346 | 0.251570151  | 0.249257742  | 1.009277182 | 3.037456218  | 0.126247 |
| 10460237 | Unc93b1       | 0.593284727  | 0.35284323   | 7.45E-005   | 0.002572227 | 0.004930861 | 0.052956205 | 0.240441498  | 0.473063978  | 0.508264228 | 1.681440021  | 0.127581 |
| 10403073 | Ighg          | 0.934655136  | 0.569913876  | 5.33E-005   | 0.002018729 | 0.003308301 | 0.040264329 | 0.364741261  | 0.752284506  | 0.48484484  | 1.639993649  | 0.128655 |
| 10570666 | LOC637882     | 0.771841052  | 0.465247925  | 6.39E-005   | 0.00230805  | 0.004062823 | 0.046143603 | 0.306593127  | 0.618544488  | 0.495668675 | 1.658988704  | 0.129025 |
| 10438784 | Gm606         | -0.716971843 | -0.424354289 | 8.80E-005   | 0.002845624 | 0.005610124 | 0.057831592 | -0.292617554 | -0.570663066 | 0.512767641 | 1.689595955  | 0.130447 |
| 10469070 | Nudt5         | 0.405892536  | 0.138532893  | 0.004117809 | 0.045690669 | 0.258304403 | 0.593294727 | 0.267359643  | 0.272212715  | 0.982171765 | 2.929936176  | 0.130649 |
| 10389858 | Nme2          | 0.66112599   | 0.347959646  | 0.000334187 | 0.007592677 | 0.024880578 | 0.159898518 | 0.313166344  | 0.504542818  | 0.620693294 | 1.90000765   | 0.13075  |
| 10357472 | Cxcr4         | 0.570510403  | 0.304179795  | 0.000300533 | 0.007020476 | 0.022012168 | 0.147596122 | 0.266330608  | 0.437345099  | 0.608971287 | 1.875569687  | 0.131581 |



Suppl Table 1

|          |               |              |              |             |             |             |             |              |              |             |             |          |
|----------|---------------|--------------|--------------|-------------|-------------|-------------|-------------|--------------|--------------|-------------|-------------|----------|
| 10395875 |               | -0.647532759 | -0.382068098 | 9.39E-005   | 0.003000772 | 0.006067492 | 0.061137899 | -0.265464661 | -0.514800429 | 0.51566519  | 1.694809805 | 0.132131 |
| 10466839 | Gm5516        | 0.578598242  | 0.266230988  | 0.001025274 | 0.017255708 | 0.075115205 | 0.311627038 | 0.312367255  | 0.422414615  | 0.739480225 | 2.173294129 | 0.132541 |
| 10406676 | Lh1pl2        | 0.763095541  | 0.478743274  | 3.79E-005   | 0.001560205 | 0.002115169 | 0.029142328 | 0.284352267  | 0.620919407  | 0.457953582 | 1.593955638 | 0.132661 |
| 10482017 | Rab14         | 0.399655963  | 0.15371867   | 0.002734812 | 0.034211912 | 0.179911558 | 0.497929241 | 0.245937294  | 0.276687316  | 0.888863634 | 2.599918176 | 0.132836 |
| 10414548 | Rnase6        | 0.471614049  | 0.218401042  | 0.001000126 | 0.016922378 | 0.072671697 | 0.305192591 | 0.252313007  | 0.345007545  | 0.733934694 | 2.159394685 | 0.133373 |
| 10545401 | Vamp5         | -0.554616654 | -0.278167245 | 0.000552022 | 0.011101381 | 0.040356438 | 0.216276532 | -0.276449409 | -0.416391949 | 0.663916317 | 1.993824451 | 0.133671 |
| 10548879 | Mgp           | 0.993112453  | 0.658626618  | 1.42E-005   | 0.000750411 | 0.000649239 | 0.01235334  | 0.334485835  | 0.825869535  | 0.405010502 | 1.507853503 | 0.134021 |
| 10553477 | Ano5          | -0.406214063 | -0.147317644 | 0.003569491 | 0.040926918 | 0.220913498 | 0.549298427 | -0.25889642  | -0.276765854 | 0.935434831 | 2.757402663 | 0.134044 |
| 10527801 | Brca2         | 0.700130527  | 0.422434272  | 7.39E-005   | 0.002559755 | 0.004461458 | 0.049360654 | 0.277696255  | 0.5612824    | 0.494753185 | 1.657371509 | 0.13488  |
| 10532896 | 2610524H06Rik | 0.441350039  | 0.168104824  | 0.003038016 | 0.036730948 | 0.190083162 | 0.510475237 | 0.273245215  | 0.304727431  | 0.896687293 | 2.625445418 | 0.136038 |
| 10385770 | Olfr1372-ps1  | -0.727953506 | -0.449484186 | 5.46E-005   | 0.00205422  | 0.003084344 | 0.038297344 | -0.27846932  | -0.588718846 | 0.473009012 | 1.61953085  | 0.136579 |
| 10362701 | Ddo           | -0.508869099 | -0.24242974  | 0.000887796 | 0.015629599 | 0.062228214 | 0.279341342 | -0.266439358 | -0.37564942  | 0.70927664  | 2.099037428 | 0.136974 |
| 10446907 | Ttc27         | 0.57751402   | 0.299046921  | 0.000452301 | 0.009555287 | 0.031646027 | 0.161759366 | 0.278467099  | 0.43828047   | 0.635362783 | 1.931181965 | 0.137036 |
| 10380477 | Ppp1r9b       | 0.611073323  | 0.219753531  | 0.003922228 | 0.043772069 | 0.230710568 | 0.561120411 | 0.391319791  | 0.415413427  | 0.942000826 | 2.780721289 | 0.137336 |
| 10436708 | Usp16         | 0.453442707  | 0.214295144  | 0.000959581 | 0.016464261 | 0.066395819 | 0.290689079 | 0.239147562  | 0.333868926  | 0.716291766 | 2.115972847 | 0.137894 |
| 10458398 | Hars          | 0.504325812  | 0.267519291  | 0.000371621 | 0.008237268 | 0.02542221  | 0.161759366 | 0.236806521  | 0.385922552  | 0.613611514 | 1.885194187 | 0.138284 |
| 10587829 | Plod2         | -0.514052044 | -0.286350961 | 0.000230546 | 0.005818738 | 0.015043163 | 0.115065601 | -0.227701083 | -0.400201503 | 0.568966086 | 1.795181834 | 0.1396   |
| 10449315 | 2900010M23Rik | 0.517043004  | 0.24658419   | 0.000937967 | 0.016201712 | 0.063579835 | 0.283042896 | 0.270458814  | 0.381813597  | 0.708353018 | 2.096821368 | 0.13983  |
| 10362794 | Ppil6         | -1.268986076 | -0.721273709 | 0.000185879 | 0.004990734 | 0.011798828 | 0.098042189 | -0.547712367 | -0.995129892 | 0.550392839 | 1.759368267 | 0.14028  |
| 10400710 | Gm71          | 0.523709289  | 0.226753065  | 0.001766131 | 0.024976882 | 0.113869115 | 0.390747651 | 0.296956224  | 0.375231177  | 0.79139539  | 2.309601807 | 0.140515 |
| 10419223 | Fermt2        | -0.674575545 | -0.417999668 | 6.19E-005   | 0.002258762 | 0.003292689 | 0.040169558 | -0.256575877 | -0.546287607 | 0.469671788 | 1.613818375 | 0.143396 |
| 10582008 | 2310061C15Rik | 0.664551216  | 0.432534937  | 2.81E-005   | 0.001233388 | 0.001281517 | 0.020393039 | 0.23201628   | 0.548543077  | 0.422968203 | 1.536410495 | 0.145291 |
| 10433212 | Olfr15        | -0.485455427 | -0.197700763 | 0.002685501 | 0.03382828  | 0.156337724 | 0.464629835 | -0.287754664 | -0.341578095 | 0.842427158 | 2.455506084 | 0.145491 |
| 10376208 | Gm2a          | 0.587996301  | 0.346421187  | 0.000136189 | 0.003936611 | 0.007839355 | 0.073952804 | 0.241575114  | 0.467208744  | 0.517060343 | 1.697345089 | 0.145857 |
| 10376196 | Hint1         | 0.519950175  | 0.279916716  | 0.00388694  | 0.008549264 | 0.024284657 | 0.157368994 | 0.240033459  | 0.399933446  | 0.600183511 | 1.857517418 | 0.146438 |
| 10602592 | Hsd17b10      | 0.453075144  | 0.20450534   | 0.00158806  | 0.023056834 | 0.096145621 | 0.356473464 | 0.248569804  | 0.328790242  | 0.756013324 | 2.215468522 | 0.147174 |
| 10583034 | Dcun1d5       | 0.466433319  | 0.233999217  | 0.000748557 | 0.013685156 | 0.046989323 | 0.237425578 | 0.232434102  | 0.350216268  | 0.663687337 | 1.993311454 | 0.147312 |
| 10553131 | Kdelr1        | 0.487207809  | 0.223016757  | 0.001469982 | 0.022035168 | 0.089243503 | 0.342714277 | 0.264191052  | 0.355112283  | 0.743964839 | 2.184624224 | 0.147959 |
| 10437376 | Srl           | -0.577096925 | -0.327794857 | 0.000227816 | 0.005783946 | 0.013436222 | 0.107205762 | -0.249302068 | -0.452445891 | 0.551009685 | 1.760542951 | 0.148347 |
| 10546010 | Arhgap25      | 0.799869679  | 0.53975003   | 1.54E-005   | 0.000782623 | 0.00060018  | 0.011653428 | 0.260119648  | 0.669809854  | 0.388348494 | 1.481926139 | 0.149708 |
| 10373873 | Sf3a1         | 0.459468716  | 0.235194568  | 0.000694182 | 0.012921149 | 0.041642064 | 0.220656695 | 0.224274148  | 0.347331642  | 0.645706067 | 1.953568574 | 0.15159  |
| 10365578 | Nup37         | 0.409618876  | 0.15895376   | 0.003750208 | 0.042330849 | 0.195116123 | 0.516708898 | 0.250665117  | 0.284286318  | 0.881734719 | 2.576968781 | 0.151654 |
| 10557177 | Prkcb         | 0.518421839  | 0.292684011  | 0.000270013 | 0.006495503 | 0.015407921 | 0.116698296 | 0.225737828  | 0.405552925  | 0.556617433 | 1.771268056 | 0.152601 |
| 10521984 | G6pd2         | 0.455839444  | 0.220511811  | 0.001160969 | 0.018724005 | 0.066638428 | 0.291063823 | 0.235327633  | 0.338175628  | 0.69587402  | 2.06718834  | 0.15488  |
| 10514275 | Ptplad2       | 0.681403036  | 0.367265988  | 0.000469232 | 0.009832046 | 0.026843971 | 0.167578403 | 0.314137048  | 0.524334512  | 0.599115719 | 1.855339341 | 0.155321 |
| 10501802 | Tmem56        | 0.727268361  | 0.4983332    | 1.31E-005   | 0.000707468 | 0.000463299 | 0.009739519 | 0.228935161  | 0.612800781  | 0.373588233 | 1.459401784 | 0.156084 |
| 10411611 | Naip5         | 0.735990102  | 0.351336894  | 0.00131159  | 0.020309075 | 0.073830817 | 0.308244862 | 0.384653208  | 0.543663498  | 0.707520753 | 2.094827256 | 0.156234 |
| 10538715 | C130092O11Rik | -0.41557209  | -0.191588383 | 0.001670205 | 0.024003813 | 0.092090119 | 0.348638522 | -0.223983707 | -0.303580237 | 0.737807274 | 2.169088141 | 0.156687 |
| 10404051 | Hist1h4d      | 0.593826232  | 0.334155497  | 0.00031395  | 0.00724683  | 0.017172198 | 0.125935995 | 0.259670735  | 0.463990864  | 0.559646225 | 1.777095508 | 0.157567 |
| 10431738 | Prickle1      | -0.50123337  | -0.256252854 | 0.000802588 | 0.014456727 | 0.045077205 | 0.231124386 | -0.244980516 | -0.378743112 | 0.646825008 | 1.95601088  | 0.157931 |
| 10447383 | Epcam         | 0.406159546  | 0.191340803  | 0.001486721 | 0.022199629 | 0.081646408 | 0.326534745 | 0.214818742  | 0.298750175  | 0.719058132 | 2.122702209 | 0.157981 |
| 10465625 | Otub1         | 0.497906832  | 0.233212067  | 0.001562227 | 0.022859182 | 0.085038215 | 0.33401085  | 0.264694766  | 0.365559449  | 0.724081312 | 2.134996012 | 0.158542 |
| 10503196 | Chd7          | 0.645643397  | 0.339912257  | 0.000631501 | 0.012141846 | 0.035135424 | 0.198909587 | 0.305731141  | 0.492777827  | 0.620423899 | 1.899441354 | 0.158751 |
| 10532576 | Myo18b        | -0.370752066 | -0.140690889 | 0.004729511 | 0.049519299 | 0.219541091 | 0.547892807 | -0.230061177 | -0.255721478 | 0.899655277 | 2.635224414 | 0.159665 |
| 10346374 | Aox1          | -0.709358736 | -0.481591177 | 1.79E-005   | 0.000880997 | 0.000644754 | 0.012295352 | -0.227767559 | -0.595474956 | 0.382497293 | 1.472947947 | 0.160204 |
| 10583444 | Olfr39        | -0.566991545 | -0.264516647 | 0.001659974 | 0.023887048 | 0.088435501 | 0.341021194 | -0.302474898 | -0.415754096 | 0.727533176 | 2.143500424 | 0.160323 |
| 10605252 | Tex28         | -0.52197923  | -0.218150971 | 0.003116126 | 0.037254179 | 0.154571463 | 0.461556575 | -0.303828259 | -0.370065101 | 0.821013    | 2.392743094 | 0.160449 |
| 10427679 | Spef2         | -0.615877404 | -0.314426701 | 0.000865456 | 0.015341526 | 0.047096581 | 0.237840617 | -0.301450703 | -0.465152052 | 0.648069166 | 1.958731245 | 0.161008 |
| 10591853 | Tbx20         | -0.581216759 | -0.344143513 | 0.000183763 | 0.004959869 | 0.009258035 | 0.082694726 | -0.237073246 | -0.462680136 | 0.512391233 | 1.688879018 | 0.161081 |
| 10396030 | Fancm         | 0.434366274  | 0.215771071  | 0.001080944 | 0.017819956 | 0.058454365 | 0.26998117  | 0.218595203  | 0.325068673  | 0.672458535 | 2.01308856  | 0.161116 |
| 10404913 | Cap2          | -0.711527286 | -0.476378162 | 2.49E-005   | 0.001146168 | 0.000936617 | 0.016222063 | -0.235194623 | -0.593975474 | 0.395966894 | 1.493714116 | 0.161512 |
| 10440522 | Adamts1       | -0.548401401 | -0.304767692 | 0.000393206 | 0.008611621 | 0.020914598 | 0.142502537 | -0.243633708 | -0.426584546 | 0.571126429 | 1.799407925 | 0.161548 |
| 10435305 | Itgb5         | 0.382479379  | 0.15063111   | 0.004234107 | 0.046002788 | 0.196511713 | 0.517820458 | 0.231848268  | 0.266555244  | 0.869794435 | 2.539179175 | 0.162234 |
| 10594911 | Tex9          | 0.709736501  | 0.451936982  | 6.52E-005   | 0.002333912 | 0.002829505 | 0.035901002 | 0.257799519  | 0.580836742  | 0.443841618 | 1.570432448 | 0.162916 |
| 10345675 | Npas2         | -0.393819359 | -0.158014542 | 0.00399084  | 0.044230085 | 0.185102741 | 0.504054439 | -0.235804817 | -0.27591695  | 0.854622438 | 2.492298202 | 0.163572 |
| 10595046 | Gm3671        | 0.66167191   | 0.431811985  | 4.49E-005   | 0.001782801 | 0.001795452 | 0.025934525 | 0.229859924  | 0.546741948  | 0.420417576 | 1.532314832 | 0.165283 |

Suppl Table 1

|           |               |              |              |             |             |             |             |              |              |             |             |          |
|-----------|---------------|--------------|--------------|-------------|-------------|-------------|-------------|--------------|--------------|-------------|-------------|----------|
| 10461844  | Gnaq          | -0.423849238 | -0.192491703 | 0.002157972 | 0.028985256 | 0.107276701 | 0.378702063 | -0.231357535 | -0.30817047  | 0.750745309 | 2.201909129 | 0.165284 |
| 10555108  | Clns1a        | 0.475412235  | 0.246445177  | 0.000831199 | 0.014857389 | 0.043353299 | 0.225849781 | 0.228967058  | 0.360928706  | 0.634383062 | 1.929079077 | 0.165342 |
| 10538150  | Tmem176a      | 0.908426204  | 0.619043635  | 1.90E-005   | 0.000920581 | 0.000654298 | 0.012422314 | 0.289382569  | 0.763734919  | 0.378904462 | 1.467467159 | 0.165483 |
| 105685609 | Thrsp         | -0.60755972  | -0.365299706 | 0.000168058 | 0.00464839  | 0.007967446 | 0.014692623 | -0.242260014 | -0.486429713 | 0.49803704  | 1.663181521 | 0.166084 |
| 10481272  | 1700007K13Rik | -0.558812034 | -0.247867805 | 0.002521018 | 0.032388126 | 0.122166924 | 0.405506349 | -0.310944229 | -0.40333992  | 0.770923517 | 2.254476068 | 0.166242 |
| 10530045  | Sepsecs       | 0.370416768  | 0.147309842  | 0.004437652 | 0.047244152 | 0.195396273 | 0.51710477  | 0.223106927  | 0.258863305  | 0.861871584 | 2.514541894 | 0.167513 |
| 10468893  | Csf2ra        | 0.531918431  | 0.296908148  | 0.000437417 | 0.009317533 | 0.021778668 | 0.146569178 | 0.235010283  | 0.41441329   | 0.56709157  | 1.791525206 | 0.168624 |
| 10599960  |               | -0.504546891 | -0.207710403 | 0.003873465 | 0.0433165   | 0.172898581 | 0.488331952 | -0.296836488 | -0.356128647 | 0.833509156 | 2.429088209 | 0.168739 |
| 10567456  | Dnahc3        | -0.723056955 | -0.311258097 | 0.003127907 | 0.03732548  | 0.143689321 | 0.442869534 | -0.411798858 | -0.517157526 | 0.796273548 | 2.323014122 | 0.169196 |
| 10502230  |               | 0.53093379   | 0.226196411  | 0.003321316 | 0.039106209 | 0.150796403 | 0.454778443 | 0.304737379  | 0.3785651    | 0.804980118 | 2.347224645 | 0.169566 |
| 10574027  | Mt1           | 0.480504095  | 0.263559269  | 0.000547456 | 0.011029904 | 0.026960768 | 0.167723944 | 0.216944826  | 0.372031682  | 0.583135353 | 1.823134876 | 0.170639 |
| 10597461  | Cmtm7         | 0.627477322  | 0.386585965  | 0.000133505 | 0.003880938 | 0.005864381 | 0.059591027 | 0.240891357  | 0.507031643  | 0.475101229 | 1.623124943 | 0.171125 |
| 10598236  | Nudt11        | -0.769728684 | -0.406756225 | 0.000816346 | 0.014661895 | 0.039628202 | 0.13856852  | -0.362972459 | -0.588242455 | 0.617045669 | 1.892358706 | 0.172807 |
| 10436727  | ORF63         | 0.599562153  | 0.352063856  | 0.000266853 | 0.006431525 | 0.012342676 | 0.101153196 | 0.247498297  | 0.475813004  | 0.520158748 | 1.702992632 | 0.172865 |
| 10567458  | Dnahc3        | -0.517490139 | -0.301399161 | 0.000292545 | 0.006952618 | 0.013767131 | 0.109086074 | -0.216090978 | -0.40944465  | 0.527766032 | 1.716959456 | 0.17288  |
| 10355998  | Fam124b       | -0.533523349 | -0.23068458  | 0.003272443 | 0.038619338 | 0.144475288 | 0.444065583 | -0.302838769 | -0.382103965 | 0.792555944 | 2.312782883 | 0.173133 |
| 10447880  | Mrp18         | 0.73219699   | 0.499263125  | 2.30E-005   | 0.001079838 | 0.000760485 | 0.013893322 | 0.232933865  | 0.615730057  | 0.378305172 | 1.466555317 | 0.173551 |
| 10558248  | Bub3          | 0.46133394   | 0.21981254   | 0.001859922 | 0.026016603 | 0.086803957 | 0.337368221 | 0.2415214    | 0.34057324   | 0.709161413 | 2.098760789 | 0.173772 |
| 10465861  | Incenp        | 0.650180214  | 0.421019958  | 6.42E-005   | 0.002313719 | 0.002484117 | 0.032867167 | 0.229160255  | 0.535600086  | 0.427857018 | 1.544297844 | 0.174171 |
| 10347232  | Xrcc5         | 0.492772931  | 0.280811472  | 0.000393041 | 0.008611621 | 0.01841286  | 0.131028914 | 0.211961458  | 0.386792201  | 0.547998272 | 1.754817659 | 0.174279 |
| 10411272  |               | -0.354550015 | -0.146429202 | 0.004190213 | 0.045776058 | 0.176322235 | 0.49263515  | -0.208120812 | -0.250489609 | 0.830856073 | 2.421306741 | 0.174312 |
| 10545217  | LOC100046973  | 1.645711747  | 1.159152801  | 1.12E-005   | 0.000630449 | 0.000321909 | 0.007470847 | 0.486558946  | 1.402432274  | 0.346939353 | 1.419753932 | 0.174776 |
| 10393642  | Eif4a3        | 0.41183419   | 0.182090762  | 0.003053944 | 0.036829346 | 0.132763283 | 0.423114967 | 0.229743428  | 0.296962476  | 0.773644642 | 2.261697333 | 0.176085 |
| 10452450  | E130009J12Rik | -0.428884965 | -0.203200672 | 0.002061549 | 0.028042304 | 0.092450592 | 0.349281984 | -0.225684292 | -0.316042819 | 0.714094038 | 2.110647371 | 0.177362 |
| 10401114  | Rab15         | 0.47864023   | 0.257515881  | 0.000776495 | 0.014095522 | 0.035711838 | 0.201108261 | 0.221124349  | 0.368078056  | 0.600753959 | 1.858682378 | 0.178552 |
| 10478847  | 1500012F01Rik | 0.399253237  | 0.183211506  | 0.002601062 | 0.033084266 | 0.112322387 | 0.388347392 | 0.216041731  | 0.291232372  | 0.741819084 | 2.179193032 | 0.179149 |
| 10527487  | Cyp3a57       | -0.379090775 | -0.155051927 | 0.004772423 | 0.049884946 | 0.188327741 | 0.507967396 | -0.224038848 | -0.267071351 | 0.838872634 | 2.44492785  | 0.179534 |
| 10481540  | Fnbp1         | 0.459406816  | 0.221893525  | 0.001897714 | 0.026387069 | 0.083774563 | 0.31226969  | 0.237513291  | 0.340650171  | 0.697235203 | 2.070393067 | 0.179932 |
| 10586454  | D300028M11Rik | 0.438139455  | 0.184650651  | 0.004230335 | 0.046002788 | 0.168815981 | 0.483019574 | 0.253488803  | 0.311395053  | 0.681404248 | 2.372802108 | 0.180739 |
| 10521815  |               | -0.420541521 | -0.190146405 | 0.003015855 | 0.036564388 | 0.124323189 | 0.408479881 | -0.230395117 | -0.305343963 | 0.754542891 | 2.21167222  | 0.182686 |
| 10487252  | Gabpb1        | 0.419668663  | 0.216365774  | 0.001228402 | 0.019463341 | 0.05402859  | 0.258912122 | 0.20330289   | 0.318017218  | 0.639282649 | 1.939625923 | 0.182911 |
| 10354003  | Mgat4a        | 0.969957001  | 0.690013509  | 1.08E-005   | 0.000619497 | 0.000286185 | 0.006843021 | 0.279943492  | 0.829985255  | 0.337287308 | 1.405707263 | 0.18309  |
| 10468762  | 4930506M07Rik | 0.453357144  | 0.229922338  | 0.001424688 | 0.021511118 | 0.06183738  | 0.278414643 | 0.223434806  | 0.341639741  | 0.654007071 | 1.971783813 | 0.183798 |
| 10390640  | Ikzf3         | 0.769328231  | 0.522491417  | 3.29E-005   | 0.001393647 | 0.001042728 | 0.017493298 | 0.246836814  | 0.645909824  | 0.382153677 | 1.472422716 | 0.184559 |
| 10493995  | S100a10       | 0.514099445  | 0.262443403  | 0.001384443 | 0.021052067 | 0.059515463 | 0.273228367 | 0.251656043  | 0.388271424  | 0.64814464  | 1.958896431 | 0.185037 |
| 10485982  | Actc1         | -1.180550057 | -0.816632739 | 2.23E-005   | 0.001053846 | 0.000660623 | 0.012486647 | -0.363917317 | -0.998591398 | 0.364430655 | 1.445631555 | 0.185126 |
| 10476945  | Cst7          | 0.702224536  | 0.436770099  | 0.000159159 | 0.0044502   | 0.00623369  | 0.062341176 | 0.265454437  | 0.569497317  | 0.46612061  | 1.607766964 | 0.185126 |
| 10446253  | Vav1          | 0.78550248   | 0.554527174  | 1.39E-005   | 0.000741295 | 0.000378224 | 0.008414835 | 0.230975307  | 0.670014827  | 0.344731635 | 1.416526579 | 0.185506 |
| 10559818  |               | 0.683292948  | 0.320925483  | 0.002557042 | 0.032718925 | 0.104139031 | 0.371978936 | 0.362367465  | 0.502109216  | 0.721690528 | 2.129132723 | 0.18639  |
| 10368644  | Fam26f        | 0.672017103  | 0.465982672  | 2.20E-005   | 0.001044354 | 0.000639264 | 0.012217888 | 0.206034431  | 0.568999887  | 0.362099247 | 1.442150413 | 0.1867   |
| 10360120  | Ufc1          | 0.555380489  | 0.292809428  | 0.001107488 | 0.018112728 | 0.046928266 | 0.237257185 | 0.262571062  | 0.424094958  | 0.619132711 | 1.896730217 | 0.187421 |
| 10464529  | Tcigr1        | 0.419788033  | 0.201289017  | 0.002313365 | 0.030560702 | 0.093604831 | 0.351572843 | 0.218499016  | 0.310538525  | 0.703613233 | 2.085498944 | 0.188322 |
| 10549588  | Rps9          | 0.805677955  | 0.548100008  | 3.48E-005   | 0.001465408 | 0.001076194 | 0.017925856 | 0.257577947  | 0.676888982  | 0.380532043 | 1.469946986 | 0.188382 |
| 10346255  | Omrld1        | 0.493228666  | 0.214037464  | 0.004214565 | 0.045936079 | 0.157194527 | 0.465060987 | 0.279191202  | 0.353633065  | 0.789494053 | 2.304403427 | 0.189477 |
| 10545255  | Rpia          | 0.379364897  | 0.166515183  | 0.004046492 | 0.044692499 | 0.150536436 | 0.454477681 | 0.212849715  | 0.27294004   | 0.779840564 | 2.278260103 | 0.19061  |
| 10602223  | Alg13         | 0.401838644  | 0.179562217  | 0.003721189 | 0.04212851  | 0.139312043 | 0.436293499 | 0.222276427  | 0.29070043   | 0.76462366  | 2.237879721 | 0.19134  |
| 10381708  | Fmnl1         | 0.445916927  | 0.228999885  | 0.001506294 | 0.022310191 | 0.060667618 | 0.275662315 | 0.216917042  | 0.337458406  | 0.642796381 | 1.947236469 | 0.192223 |
| 10567737  |               | -0.523382722 | -0.234497887 | 0.003746697 | 0.023309822 | 0.138712479 | 0.435212311 | -0.288884835 | -0.378940304 | 0.762349192 | 2.231929374 | 0.192657 |
| 10464045  | Acsf5         | 0.398081185  | 0.177414741  | 0.003883833 | 0.043381294 | 0.142591138 | 0.441499316 | 0.220666444  | 0.287747963  | 0.766874043 | 2.243788663 | 0.193094 |
| 10373692  | Vmn2r86       | -0.653166626 | -0.339164465 | 0.001409006 | 0.021337083 | 0.05630357  | 0.264696101 | -0.314002161 | -0.496165545 | 0.63285765  | 1.925810908 | 0.193471 |
| 10417841  | Ttc18         | -0.38486527  | -0.174781453 | 0.003539274 | 0.040668933 | 0.1308833   | 0.420044079 | -0.210083817 | -0.279823361 | 0.750772973 | 2.201980036 | 0.193786 |
| 10600597  | Tmem47        | -0.486056541 | -0.271967356 | 0.000713733 | 0.013217959 | 0.02856292  | 0.174212816 | -0.214089185 | -0.379011949 | 0.564861309 | 1.787187068 | 0.193883 |
| 10504926  | Rnf20         | 0.462090497  | 0.215214665  | 0.003216669 | 0.03816689  | 0.117446773 | 0.397970136 | 0.246875832  | 0.338652581  | 0.72899439  | 2.147114356 | 0.196943 |
| 10404898  | Gm1574        | -0.503049481 | -0.292966622 | 0.000490494 | 0.010161427 | 0.018836614 | 0.132865681 | -0.210083261 | -0.39800785  | 0.527836978 | 1.71709039  | 0.197152 |
| 10458589  | Prelid2       | 0.622083929  | 0.361366083  | 0.000507198 | 0.010398364 | 0.019475868 | 0.136140135 | 0.260717846  | 0.491725006  | 0.530210672 | 1.721478462 | 0.197341 |
| 10595189  | Slc17a5       | 0.440319486  | 0.238882059  | 0.001034886 | 0.017371137 | 0.040238297 | 0.215893942 | 0.201437427  | 0.339600773  | 0.593159507 | 1.843250547 | 0.197499 |

Suppl Table 1

|          |                |              |              |             |             |             |             |              |              |             |             |          |
|----------|----------------|--------------|--------------|-------------|-------------|-------------|-------------|--------------|--------------|-------------|-------------|----------|
| 10367611 | Gm221          | -0.502254165 | -0.262821418 | 0.00142584  | 0.021514795 | 0.054996702 | 0.261318473 | -0.239432746 | -0.382537792 | 0.625906124 | 1.911009262 | 0.197642 |
| 10405927 | Zfp455         | -0.549479511 | -0.317610744 | 0.000563895 | 0.011246347 | 0.021286295 | 0.144238813 | -0.231868767 | -0.433545128 | 0.534820374 | 1.730040692 | 0.199819 |
| 10562360 | Gpi1           | 0.572574615  | 0.328160783  | 0.000637261 | 0.0121796   | 0.023868974 | 0.155263261 | 0.244413832  | 0.450367699  | 0.542698404 | 1.744799026 | 0.201218 |
| 10399943 | 1110049B09Rik  | -0.511963199 | -0.253788615 | 0.002330574 | 0.030740587 | 0.084404086 | 0.33263749  | -0.258174585 | -0.382875907 | 0.674303554 | 2.017281981 | 0.201988 |
| 10450957 | Cenpq          | 0.888510453  | 0.568707491  | 0.000147758 | 0.004195419 | 0.004927085 | 0.052942899 | 0.319802962  | 0.728608972  | 0.438922624 | 1.562332951 | 0.202177 |
| 10462132 | Pgm5           | -0.45016931  | -0.232219476 | 0.001762325 | 0.024939089 | 0.064456254 | 0.28520309  | -0.217949833 | -0.341194393 | 0.638784921 | 1.93855105  | 0.203028 |
| 10507309 | RP23-233B9.8   | -0.472223911 | -0.240707057 | 0.001964746 | 0.02703783  | 0.070894479 | 0.301283689 | -0.231516854 | -0.356465484 | 0.649479021 | 1.961819966 | 0.203958 |
| 10450374 | D17H6S56E-5    | 0.888657839  | 0.628547078  | 2.21E-005   | 0.001044354 | 0.000544231 | 0.010900098 | 0.260110761  | 0.758602459  | 0.342881516 | 1.413828606 | 0.206276 |
| 10544523 | Rny1           | 1.194950563  | 0.66549745   | 0.000987043 | 0.016789544 | 0.035025047 | 0.198591319 | 0.529453113  | 0.930224007  | 0.569167329 | 1.795574969 | 0.208509 |
| 10362420 | Trdn           | -0.494841314 | -0.277015879 | 0.000941094 | 0.016225242 | 0.033333383 | 0.191752865 | -0.217825435 | -0.385928597 | 0.564419007 | 1.786328336 | 0.208719 |
| 10473272 | Zc3h15         | 0.460448726  | 0.270131398  | 0.000578772 | 0.01147176  | 0.020074053 | 0.138869717 | 0.190317328  | 0.365290062  | 0.521003302 | 1.704536125 | 0.209963 |
| 10357008 | Pign           | 0.591171461  | 0.401414283  | 6.04E-005   | 0.002219692 | 0.001677587 | 0.024718884 | 0.189757178  | 0.496292872  | 0.382349191 | 1.47272154  | 0.210392 |
| 10528929 | Hadha          | 0.427432237  | 0.228665864  | 0.001488298 | 0.022210112 | 0.051605319 | 0.251411339 | 0.198766373  | 0.32804905   | 0.605904431 | 1.869243751 | 0.210593 |
| 10495935 | 4930422G04Rik  | 0.636991868  | 0.410633617  | 0.000157713 | 0.004421684 | 0.004927559 | 0.052942899 | 0.226358251  | 0.523812742  | 0.432135824 | 1.551241404 | 0.210676 |
| 10427235 | Prr13          | 0.581856993  | 0.381204806  | 0.000119965 | 0.003605679 | 0.003631267 | 0.042853963 | 0.200652187  | 0.4815309    | 0.416696388 | 1.526363212 | 0.210784 |
| 10606473 | Hdx            | -0.560174509 | -0.279911558 | 0.002623948 | 0.033325831 | 0.086819336 | 0.337368221 | -0.280262951 | -0.420043033 | 0.667224376 | 2.001255373 | 0.212459 |
| 10581940 | Kars           | 0.425583792  | 0.209299912  | 0.002931295 | 0.03589682  | 0.096005612 | 0.356211628 | 0.21628388   | 0.317441852  | 0.681333851 | 2.033368229 | 0.212505 |
| 10508452 |                | -0.376131372 | -0.179761003 | 0.00354021  | 0.040668933 | 0.113536011 | 0.390544403 | -0.196370368 | -0.277946188 | 0.706504989 | 2.092396929 | 0.212692 |
| 10583254 | Cwc15          | 0.61394816   | 0.410434923  | 8.80E-005   | 0.002881691 | 0.00250687  | 0.033082946 | 0.203513238  | 0.512191541  | 0.397338146 | 1.495847762 | 0.213552 |
| 10552125 | Peptd          | 0.497578246  | 0.248510932  | 0.002717054 | 0.034086683 | 0.088355159 | 0.341021194 | 0.249067314  | 0.373044589  | 0.667660974 | 2.002238861 | 0.214375 |
| 10349733 | Nucks1         | 0.493507283  | 0.282005506  | 0.000860051 | 0.015256251 | 0.028846566 | 0.175393348 | 0.211501777  | 0.387756394  | 0.545450134 | 1.74999166  | 0.215355 |
| 10569057 | Rnh1           | 0.502191629  | 0.298692791  | 0.000562662 | 0.011236534 | 0.018397033 | 0.130952593 | 0.203498838  | 0.40044221   | 0.508185283 | 1.681298123 | 0.217032 |
| 10586604 | Rps27l         | 0.401141021  | 0.20975258   | 0.002019784 | 0.027576496 | 0.065625703 | 0.288389067 | 0.191388441  | 0.305446801  | 0.626585187 | 1.912448564 | 0.217251 |
| 10590983 | Panx1          | 0.485719796  | 0.296330875  | 0.000411836 | 0.008905652 | 0.0131866   | 0.105758244 | 0.189388921  | 0.391025336  | 0.484339258 | 1.639113021 | 0.21762  |
| 10424105 | Colec10        | -0.409795724 | -0.201151225 | 0.003375302 | 0.039560392 | 0.102791812 | 0.369084203 | -0.208644499 | -0.305473475 | 0.683020021 | 2.037251944 | 0.220531 |
| 10546624 | Lmod3          | -0.414937392 | -0.22163616  | 0.001793623 | 0.025275451 | 0.057146534 | 0.266891781 | -0.193301231 | -0.318286776 | 0.607317821 | 1.872155658 | 0.220604 |
| 10354916 | 4930408G06Rik  | -0.427778173 | -0.20476828  | 0.004061042 | 0.044795367 | 0.119765924 | 0.401797378 | -0.223009894 | -0.316273226 | 0.705117839 | 2.08908418  | 0.222134 |
| 10465980 | Sdhaf2         | 0.396092804  | 0.186345369  | 0.004547721 | 0.048057186 | 0.131635307 | 0.42136382  | 0.209747435  | 0.291219086  | 0.720239315 | 2.125584374 | 0.222754 |
| 10396606 | Syne6          | -0.580737677 | -0.37761294  | 0.000178295 | 0.004868599 | 0.005086372 | 0.054150554 | -0.203124737 | -0.479175309 | 0.423904849 | 1.537917839 | 0.223389 |
| 10409190 | Cenpp          | 0.496329345  | 0.295958944  | 0.000616733 | 0.011968679 | 0.019220822 | 0.134724207 | 0.200370401  | 0.396144145  | 0.505801749 | 1.677020935 | 0.223497 |
| 10459335 | Fam38b         | -0.552767212 | -0.335097272 | 0.00051664  | 0.010525455 | 0.01578511  | 0.118763523 | -0.217669941 | -0.443932242 | 0.490322441 | 1.649572405 | 0.225037 |
| 10546066 | Isy1           | 0.563417417  | 0.303932704  | 0.001825549 | 0.025647621 | 0.055542129 | 0.262454965 | 0.259484713  | 0.43367506   | 0.598339026 | 1.853757132 | 0.226647 |
| 10453825 | Snrpd1         | 0.471824769  | 0.287168554  | 0.000514983 | 0.010519662 | 0.015422761 | 0.116725683 | 0.184656214  | 0.379496662  | 0.48658192  | 1.643023797 | 0.227567 |
| 10535508 | AU022870       | 0.376377777  | 0.181332775  | 0.004250719 | 0.046066063 | 0.119895064 | 0.401973823 | 0.195045002  | 0.278855276  | 0.699448851 | 2.075619136 | 0.227747 |
| 10558325 | Bccip          | 0.556586413  | 0.344620757  | 0.000417903 | 0.009009147 | 0.012265543 | 0.100649601 | 0.211965656  | 0.450603585  | 0.470403839 | 1.615069324 | 0.228663 |
| 10449280 | Gm5226         | -0.49826467  | -0.294298544 | 0.000764709 | 0.013930846 | 0.022991823 | 0.151897002 | -0.203966125 | -0.396281607 | 0.514699955 | 1.69305856  | 0.228976 |
| 10589420 | Cdc25a         | 0.488399237  | 0.304878406  | 0.000382977 | 0.008445232 | 0.011057073 | 0.093760472 | 0.183520832  | 0.396638821  | 0.462690039 | 1.601947623 | 0.230058 |
| 10422013 | Klf12          | -0.648365133 | -0.398241277 | 0.000483717 | 0.010061629 | 0.014102378 | 0.11083277  | -0.250123856 | -0.523303205 | 0.47797119  | 1.628071147 | 0.230606 |
| 10392120 | Smarcd2        | 0.362098335  | 0.176153391  | 0.004235024 | 0.046002788 | 0.116464496 | 0.395581669 | 0.185944944  | 0.269125863  | 0.690921869 | 2.05558538  | 0.231509 |
| 10384522 | Actr2          | 0.511864333  | 0.296014835  | 0.001025877 | 0.017255708 | 0.030245062 | 0.180836303 | 0.215849497  | 0.403939584  | 0.534360845 | 1.729184729 | 0.232155 |
| 10521757 |                | 0.639701016  | 0.413831738  | 0.000232141 | 0.005847538 | 0.006338598 | 0.063037247 | 0.225869278  | 0.526766377  | 0.428784538 | 1.545799795 | 0.232183 |
| 10523802 | Cdc7           | 0.549813632  | 0.333175973  | 0.00060404  | 0.011821953 | 0.017463569 | 0.126804777 | 0.216637659  | 0.441494802  | 0.490691301 | 1.650219934 | 0.233058 |
| 10529142 | Ppm1g          | 0.381567557  | 0.183970744  | 0.004590204 | 0.048386595 | 0.123591351 | 0.40770374  | 0.197596813  | 0.28276915   | 0.698791976 | 2.074066504 | 0.233179 |
| 10389842 | Utp18          | 0.729598617  | 0.4845966    | 0.000515715 | 0.004284074 | 0.003932491 | 0.045304839 | 0.245002017  | 0.607097609  | 0.40356281  | 1.505579314 | 0.233493 |
| 10352354 | A4301110L20Rik | -0.40451538  | -0.21956094  | 0.001946692 | 0.026849919 | 0.056089956 | 0.263877746 | -0.18495444  | -0.31203816  | 0.592730197 | 1.842383168 | 0.233689 |
| 10571274 | Gsr            | 0.449422617  | 0.261753924  | 0.000976458 | 0.016628897 | 0.028440542 | 0.173791204 | 0.187668693  | 0.355588271  | 0.527769638 | 1.716966111 | 0.233716 |
| 10594418 | Smad6          | -0.576232967 | -0.368410924 | 0.000289298 | 0.006818823 | 0.007945801 | 0.074635501 | -0.207822043 | -0.472321945 | 0.440000819 | 1.56410391  | 0.23385  |
| 10386197 | 2210407C18Rik  | 0.663051374  | 0.427500618  | 0.000255824 | 0.0062626   | 0.006929366 | 0.067448985 | 0.23550756   | 0.545275996  | 0.431984458 | 1.550995123 | 0.234331 |
| 10603431 | Suv39h1        | 0.454435713  | 0.264231162  | 0.001014662 | 0.017128913 | 0.029314335 | 0.177086456 | 0.190204551  | 0.359333438  | 0.529326056 | 1.719841483 | 0.234843 |
| 10509127 | Fuca1          | 0.600332083  | 0.393293807  | 0.000199191 | 0.005249322 | 0.00524658  | 0.055189976 | 0.207038276  | 0.496812945  | 0.416732853 | 1.526421399 | 0.235007 |
| 10424392 | 9930014A18Rik  | -0.47973627  | -0.248005108 | 0.002970642 | 0.036223483 | 0.082297643 | 0.327760419 | -0.231731163 | -0.363870689 | 0.636850315 | 1.934380607 | 0.235536 |
| 10491083 | Nceh1          | 0.438920199  | 0.227325601  | 0.002972332 | 0.036226887 | 0.081815607 | 0.326702394 | 0.211594599  | 0.3331229    | 0.635184789 | 1.930799691 | 0.236454 |
| 10373027 | Tspan31        | 0.473884963  | 0.288210684  | 0.000618086 | 0.011973615 | 0.017387117 | 0.126643734 | 0.185674278  | 0.381047823  | 0.487272901 | 1.644231072 | 0.236783 |
| 10352048 | Exo1           | 0.644535636  | 0.425068944  | 0.000185811 | 0.004990734 | 0.004779223 | 0.051793678 | 0.219466693  | 0.53480229   | 0.41036977  | 1.516308463 | 0.237233 |
| 10476314 | Prnp           | -0.399453218 | -0.195732474 | 0.004413101 | 0.047041313 | 0.116133464 | 0.39508466  | -0.203720744 | -0.297592846 | 0.684561967 | 2.040812186 | 0.237306 |
| 10570201 | Atp11a         | 0.40074843   | 0.204416216  | 0.003367611 | 0.039506321 | 0.091163665 | 0.346606833 | 0.196332214  | 0.302582323  | 0.648855533 | 1.96045323  | 0.237315 |

Suppl Table 1

|          |               |              |              |             |             |             |             |              |              |             |             |          |
|----------|---------------|--------------|--------------|-------------|-------------|-------------|-------------|--------------|--------------|-------------|-------------|----------|
| 10404376 | Agtr1a        | -0.53221201  | -0.33350165  | 0.000419238 | 0.009027695 | 0.011491052 | 0.09632669  | -0.198710359 | -0.43285683  | 0.459067169 | 1.595830213 | 0.237579 |
| 10385686 | Hnmpab        | 0.58673625   | 0.405426989  | 7.72E-005   | 0.002646592 | 0.001783727 | 0.025823294 | 0.181309261  | 0.496081619  | 0.365482723 | 1.447205702 | 0.238254 |
| 10586168 | Snord16a      | 0.568295771  | 0.349481224  | 0.000553067 | 0.011101381 | 0.015276831 | 0.116076592 | 0.218814547  | 0.458888497  | 0.47683598  | 1.626112453 | 0.238559 |
| 10461334 | Mta2          | 0.394396701  | 0.210569081  | 0.00246908  | 0.03191155  | 0.067293083 | 0.292421197 | 0.18382762   | 0.302482891  | 0.607728983 | 1.873003855 | 0.239744 |
| 10356995 |               | -0.737569964 | -0.494818458 | 0.000144261 | 0.004123482 | 0.003540779 | 0.042154319 | -0.242751506 | -0.616194211 | 0.393952916 | 1.490587007 | 0.239968 |
| 10561337 | 1700049G17Rik | -0.375121161 | -0.185284119 | 0.004409312 | 0.047039994 | 0.113458724 | 0.39043211  | -0.189837042 | -0.28020264  | 0.67749912  | 2.024572657 | 0.24069  |
| 10482929 | Ly75          | 0.617037281  | 0.427391011  | 8.12E-005   | 0.00273032  | 0.001821387 | 0.026220621 | 0.18964627   | 0.522214146  | 0.363158049 | 1.443730133 | 0.24299  |
| 10439766 | Pvrl3         | -0.713409264 | -0.486092766 | 0.000114075 | 0.003473408 | 0.002665181 | 0.034394097 | -0.227316499 | -0.599751015 | 0.379018114 | 1.46764016  | 0.243073 |
| 10450723 | H2-T10        | 0.425707335  | 0.231600157  | 0.002236346 | 0.029788544 | 0.059742165 | 0.273685865 | 0.194107178  | 0.328653746  | 0.59061301  | 1.838113328 | 0.243394 |
| 10366653 | Wif1          | -0.593018053 | -0.37216867  | 0.000459621 | 0.009681115 | 0.012111586 | 0.099768999 | -0.220849383 | -0.482593361 | 0.457630379 | 1.593412076 | 0.243557 |
| 10465633 | Cox8a         | 0.429836218  | 0.226549221  | 0.003040861 | 0.03674498  | 0.078008746 | 0.318284612 | 0.203286997  | 0.328192719  | 0.619413487 | 1.897319337 | 0.246451 |
| 10475890 | Mertk         | 0.524139763  | 0.309238374  | 0.001072628 | 0.017739825 | 0.028315701 | 0.17333828  | 0.214901389  | 0.416689068  | 0.515735607 | 1.694937652 | 0.247197 |
| 10366983 | Tmem194       | 0.41291974   | 0.23999503   | 0.001279416 | 0.019951434 | 0.033611101 | 0.192732254 | 0.172924711  | 0.326457385  | 0.529700717 | 1.720534551 | 0.247904 |
| 10547590 | Klrg1         | 0.584750653  | 0.347343344  | 0.001015002 | 0.017128913 | 0.026541361 | 0.166202405 | 0.237407309  | 0.466046999  | 0.509406368 | 1.683494624 | 0.248445 |
| 10535647 | Atp5j2        | 0.45623163   | 0.268199651  | 0.001149174 | 0.018613307 | 0.029991757 | 0.179782441 | 0.188031979  | 0.36221564   | 0.519116123 | 1.701089573 | 0.24884  |
| 10571399 | Zdhhc2        | 0.538186085  | 0.34519042   | 0.00037373  | 0.008276885 | 0.009297373 | 0.082949241 | 0.192995665  | 0.441688253  | 0.436949961 | 1.559099133 | 0.249591 |
| 10488507 | Abhd12        | 0.608017312  | 0.376772409  | 0.000633967 | 0.012171024 | 0.016018217 | 0.120150672 | 0.231244903  | 0.492394861  | 0.469633056 | 1.613752222 | 0.251469 |
| 10586174 |               | 0.59960131   | 0.403701475  | 0.000174333 | 0.004796123 | 0.003977369 | 0.04549515  | 0.195899835  | 0.501651393  | 0.3905099   | 1.485259151 | 0.25257  |
| 10587023 | Rab27a        | 0.421822307  | 0.225187824  | 0.003067527 | 0.036931189 | 0.075001188 | 0.131331189 | 0.196634483  | 0.323505065  | 0.607825052 | 1.873202111 | 0.253515 |
| 10392998 | Caskin2       | -0.394426234 | -0.219987474 | 0.002116471 | 0.028593681 | 0.052795014 | 0.25496255  | -0.17443876  | -0.307206854 | 0.567821837 | 1.792948604 | 0.253681 |
| 10469457 | Pixdc2        | -0.414746226 | -0.219516348 | 0.003329385 | 0.039165283 | 0.080384415 | 0.324215455 | -0.195229877 | -0.317131287 | 0.615612163 | 1.889363727 | 0.25447  |
| 10430574 | 4933432B09Rik | -0.444884093 | -0.27190066  | 0.000819498 | 0.0146789   | 0.020254813 | 0.139645592 | -0.172983433 | -0.358392377 | 0.482664936 | 1.636200859 | 0.255769 |
| 10498168 | Exosc8        | 0.507529201  | 0.318050806  | 0.000631106 | 0.012141846 | 0.015044419 | 0.115065601 | 0.189478395  | 0.412790003  | 0.459018856 | 1.595748829 | 0.259603 |
| 10446027 | Chaf1a        | 0.504491356  | 0.276771994  | 0.002700977 | 0.033951361 | 0.063855885 | 0.283917003 | 0.227719362  | 0.390631675  | 0.582951607 | 1.822768805 | 0.259852 |
| 10579812 | Ednra         | -0.374555323 | -0.198303228 | 0.003674391 | 0.041724881 | 0.084243222 | 0.332516533 | -0.176252095 | -0.286429275 | 0.615342459 | 1.888800936 | 0.261163 |
| 10362904 | Rtn4ip1       | 0.600512684  | 0.407349376  | 0.000179807 | 0.004894256 | 0.003870399 | 0.042929416 | 0.193163307  | 0.50393103   | 0.383312985 | 1.474195662 | 0.261166 |
| 10577190 | Rasa3         | 0.712780948  | 0.458563006  | 0.000444871 | 0.009444955 | 0.01029078  | 0.089298086 | 0.254217942  | 0.585671977  | 0.434061987 | 1.554379526 | 0.261298 |
| 10538106 | Zfp775        | -0.388526866 | -0.211473886 | 0.002993601 | 0.036379893 | 0.069247746 | 0.297083595 | -0.17705298  | -0.30000376  | 0.59017586  | 1.837233303 | 0.262191 |
| 10414260 | Ang3          | 0.648631703  | 0.353769869  | 0.002953698 | 0.036033987 | 0.068280018 | 0.294592479 | 0.294861834  | 0.501200786  | 0.588310798 | 1.833484874 | 0.262427 |
| 10591563 | Kank2         | -0.374531464 | -0.192866844 | 0.004618195 | 0.048661666 | 0.102418887 | 0.368449613 | -0.18166462  | -0.283699154 | 0.640342481 | 1.941917316 | 0.26296  |
| 10506108 |               | -0.978284552 | -0.541562459 | 0.002629615 | 0.033370882 | 0.060922948 | 0.276141098 | -0.436722093 | -0.759923505 | 0.574692176 | 1.806411313 | 0.263155 |
| 10373986 | Ap1b1         | 0.431310614  | 0.255918283  | 0.001328278 | 0.020483876 | 0.031316923 | 0.184621675 | 0.175392331  | 0.343614449  | 0.510433515 | 1.685345059 | 0.263401 |
| 10526743 | Cops6         | 0.492729294  | 0.282682001  | 0.001907813 | 0.026455828 | 0.044574905 | 0.229794869 | 0.210047293  | 0.387705647  | 0.541770012 | 1.74305153  | 0.263903 |
| 10536898 | Irf5          | 0.380786889  | 0.203415854  | 0.003665568 | 0.041668641 | 0.081692923 | 0.326568127 | 0.177371035  | 0.292101372  | 0.607224244 | 1.871962685 | 0.265626 |
| 10450161 | H2-Ea         | 0.584958896  | 0.387854279  | 0.000296482 | 0.006968735 | 0.006465267 | 0.063925456 | 0.1971104617 | 0.486406587  | 0.405226044 | 1.508192453 | 0.265655 |
| 10525553 |               | -0.506241358 | -0.29231127  | 0.001865009 | 0.026073563 | 0.04285955  | 0.224285204 | -0.213930088 | -0.399276314 | 0.535794588 | 1.731857134 | 0.266477 |
| 10507551 | 2610528J11Rik | -0.475782987 | -0.29591729  | 0.000790694 | 0.014292621 | 0.018111825 | 0.129497027 | -0.179865697 | -0.385850139 | 0.46615429  | 1.607824225 | 0.266515 |
| 10404649 | Dsp           | -0.55255696  | -0.377973898 | 0.00017071  | 0.004711601 | 0.003517424 | 0.041973531 | -0.174583062 | -0.465265429 | 0.375233257 | 1.461891848 | 0.266701 |
| 10537789 | Tas2r126      | -0.549193297 | -0.329338184 | 0.001255692 | 0.01971321  | 0.028851138 | 0.175393438 | -0.219855113 | -0.439265741 | 0.500505942 | 1.667566423 | 0.267203 |
| 10591120 | Fat3          | -0.762349184 | -0.467210706 | 0.001000662 | 0.016922378 | 0.022629527 | 0.150195079 | -0.295138478 | -0.614779945 | 0.48007174  | 1.631703157 | 0.269128 |
| 10574572 | 2210023G05Rik | -0.706966811 | -0.500305307 | 8.76E-005   | 0.002878035 | 0.001649352 | 0.02441498  | -0.206661504 | -0.603636059 | 0.342361097 | 1.41307078  | 0.269311 |
| 10386070 | Atox1         | 0.620063385  | 0.410798213  | 0.000334191 | 0.007592677 | 0.00707714  | 0.068497753 | 0.209265171  | 0.515430799  | 0.406000518 | 1.509411104 | 0.271219 |
| 10495830 | Sec24d        | 0.401651913  | 0.230287859  | 0.002232742 | 0.029755979 | 0.048758328 | 0.24270701  | 0.171364054  | 0.315969886  | 0.542342995 | 1.744129782 | 0.273374 |
| 10393836 | Arhgdia       | 0.522884678  | 0.323358179  | 0.000971271 | 0.01658722  | 0.021249842 | 0.144182115 | 0.199526499  | 0.423121429  | 0.471558484 | 1.617044851 | 0.274041 |
| 10490826 | Zbtb10        | -0.484358961 | -0.296750387 | 0.00109214  | 0.017927332 | 0.023939913 | 0.15568525  | -0.187608574 | -0.390554674 | 0.480364431 | 1.63221004  | 0.274042 |
| 10405427 | Prelid1       | 0.646889324  | 0.461965968  | 7.89E-005   | 0.002679275 | 0.001417407 | 0.02203634  | 0.184923356  | 0.554427646  | 0.333539205 | 1.400296492 | 0.274475 |
| 10410984 | Ckmt2         | -0.847468384 | -0.599079473 | 1.00E-004   | 0.003138356 | 0.001845126 | 0.026473277 | -0.24838891  | -0.723273928 | 0.343423012 | 1.41461763  | 0.274508 |
| 10605081 | Bcap31        | 0.451725938  | 0.246082648  | 0.003596056 | 0.04111517  | 0.075750647 | 0.312767644 | 0.205643289  | 0.348904293  | 0.589397418 | 1.835667574 | 0.274814 |
| 10432986 | Aaas          | 0.544593735  | 0.354134835  | 0.000487484 | 0.010107225 | 0.010299424 | 0.089310288 | 0.1904589    | 0.449364285  | 0.42384076  | 1.537814644 | 0.275201 |
| 10375485 |               | 0.520046778  | 0.349432806  | 0.000282266 | 0.006707579 | 0.005738015 | 0.058772297 | 0.170613972  | 0.434739792  | 0.392450785 | 1.488259745 | 0.275201 |
| 10546762 | Il5ra         | 0.426563791  | 0.260187013  | 0.001184059 | 0.018987738 | 0.02570542  | 0.163036006 | 0.166376778  | 0.343375402  | 0.484533188 | 1.639450742 | 0.275618 |
| 10377689 | Gabarap       | 0.623766942  | 0.41528447   | 0.000338386 | 0.007659331 | 0.00692771  | 0.067448985 | 0.208482472  | 0.519525706  | 0.401293853 | 1.502023281 | 0.276321 |
| 10484227 | Sestd1        | 0.514301326  | 0.310676759  | 0.001348323 | 0.020723802 | 0.02911159  | 0.176427505 | 0.203624566  | 0.412489042  | 0.493648425 | 1.65542259  | 0.276501 |
| 10356271 | A530032D15Rik | 0.715718064  | 0.491399965  | 0.00019292  | 0.005123255 | 0.00376041  | 0.043979073 | 0.224318099  | 0.603559014  | 0.371658932 | 1.45648782  | 0.276581 |
| 10594110 | Neo1          | -0.598391378 | -0.409095665 | 0.000220653 | 0.005635549 | 0.004278472 | 0.047956255 | -0.189295713 | -0.503743522 | 0.37577796  | 1.462717475 | 0.279204 |
| 10363157 | Pln           | -1.062670424 | -0.734368069 | 0.000179421 | 0.004888946 | 0.003406205 | 0.041105066 | -0.328302355 | -0.898519246 | 0.36538155  | 1.447054235 | 0.279489 |

Suppl Table 1

|          |               |              |              |             |             |             |             |              |              |             |             |          |
|----------|---------------|--------------|--------------|-------------|-------------|-------------|-------------|--------------|--------------|-------------|-------------|----------|
| 10591369 | Dnmt1         | 0.584594062  | 0.415941499  | 9.57E-005   | 0.003042659 | 0.001698103 | 0.024906932 | 0.168652563  | 0.500267781  | 0.337124574 | 1.405471834 | 0.279601 |
| 10455514 | Kcnn2         | -0.495607112 | -0.30398172  | 0.001184329 | 0.018987738 | 0.025037517 | 0.160305057 | -0.191625392 | -0.399794416 | 0.479309825 | 1.630384589 | 0.279639 |
| 10387922 | Slc25a11      | 0.50530495   | 0.269122444  | 0.004709814 | 0.049383786 | 0.093167042 | 0.350646867 | 0.236182507  | 0.387213697  | 0.609953905 | 1.877602416 | 0.281267 |
| 10427402 | Ghr           | -0.432595542 | -0.260080835 | 0.001543899 | 0.022705344 | 0.03227238  | 0.188051632 | -0.172514707 | -0.346338188 | 0.498110553 | 1.663311875 | 0.281394 |
| 10431915 | Slc38a4       | -0.519044595 | -0.332058381 | 0.000696514 | 0.012955169 | 0.014363132 | 0.112018884 | -0.186986214 | -0.425551488 | 0.439397392 | 1.563112466 | 0.281407 |
| 10398130 | Ak7           | -0.449105643 | -0.250658948 | 0.00324384  | 0.038376818 | 0.065989336 | 0.289491415 | -0.198446695 | -0.349882295 | 0.567181298 | 1.791700022 | 0.28158  |
| 10593225 | Zbtb16        | -0.815907388 | -0.534238181 | 0.00050301  | 0.01034797  | 0.010112927 | 0.088262019 | -0.281669206 | -0.675072785 | 0.417242722 | 1.52723526  | 0.28287  |
| 10581289 | Atp6v0d1      | 0.460365712  | 0.264416404  | 0.002553534 | 0.032690326 | 0.052135228 | 0.25292138  | 0.195949308  | 0.362391058  | 0.540712315 | 1.741063357 | 0.283065 |
| 10498653 | 1110032A04Rik | -0.55472087  | -0.358943644 | 0.000606418 | 0.011827911 | 0.012293911 | 0.10085015  | -0.195777226 | -0.456832257 | 0.428553857 | 1.545426083 | 0.28307  |
| 10430372 | Rac2          | 0.465239187  | 0.294501775  | 0.000844528 | 0.015039673 | 0.017249938 | 0.126182037 | 0.170737412  | 0.379870481  | 0.449462173 | 1.579750026 | 0.28387  |
| 10438415 | Igl-V2        | 0.577955549  | 0.398762274  | 0.000202797 | 0.005306706 | 0.003777349 | 0.044128687 | 0.179193275  | 0.488358911  | 0.366929466 | 1.449373691 | 0.284103 |
| 10569717 |               | -0.458209195 | -0.280247544 | 0.001340819 | 0.020633176 | 0.027391884 | 0.169402825 | -0.17796165  | -0.36922837  | 0.481982602 | 1.635015914 | 0.285001 |
| 10494804 | Casq2         | -0.559695305 | -0.380357796 | 0.000276469 | 0.006620263 | 0.005230109 | 0.055234098 | -0.179337509 | -0.470026551 | 0.381547614 | 1.471496867 | 0.285045 |
| 10545502 | Dnahc6        | -0.735043168 | -0.487398637 | 0.000442952 | 0.009419797 | 0.008593672 | 0.078835735 | -0.247644531 | -0.611220903 | 0.405163714 | 1.508094426 | 0.287133 |
| 10355214 | Ihh1          | 0.651629925  | 0.425805869  | 0.000568104 | 0.011312708 | 0.011126563 | 0.094194134 | 0.225824056  | 0.538717897  | 0.419187959 | 1.530345099 | 0.28783  |
| 10371662 | Spic          | 0.790081106  | 0.492577089  | 0.001115089 | 0.018195874 | 0.022273262 | 0.148726617 | 0.297504018  | 0.641329098  | 0.463886667 | 1.603974534 | 0.288249 |
| 10512949 | Abca1         | 0.359291066  | 0.197082034  | 0.004142102 | 0.045475843 | 0.079459822 | 0.321925219 | 0.162209032  | 0.27818655   | 0.583094446 | 1.82305337  | 0.28829  |
| 10502469 | Pdlim5        | -0.41062096  | -0.250340668 | 0.001473346 | 0.022064089 | 0.029441735 | 0.17776591  | -0.160280292 | -0.330480814 | 0.484991215 | 1.640248717 | 0.288406 |
| 10436892 | Itns1         | 0.433869006  | 0.250235442  | 0.002666159 | 0.033662063 | 0.052530134 | 0.254231198 | 0.183633564  | 0.342052224  | 0.536858266 | 1.733843146 | 0.288469 |
| 10427640 |               | -0.594418412 | -0.36522139  | 0.001355585 | 0.020810501 | 0.026991517 | 0.167793235 | -0.229197022 | -0.479819901 | 0.477673023 | 1.627556405 | 0.289001 |
| 10388377 | Srr           | -0.488704348 | -0.283765903 | 0.002520776 | 0.032388126 | 0.049595434 | 0.24551892  | -0.204938445 | -0.386235125 | 0.530605406 | 1.722209552 | 0.289086 |
| 10580649 | Es22          | -0.633201368 | -0.441289471 | 0.000192003 | 0.005114407 | 0.003384638 | 0.040903094 | -0.191911897 | -0.537245419 | 0.35721458  | 1.43488891  | 0.291772 |
| 10550698 | Ckm           | -0.363131816 | -0.206845927 | 0.00315723  | 0.037605463 | 0.060380268 | 0.274986499 | -0.156285889 | -0.284988872 | 0.548392953 | 1.755566673 | 0.291915 |
| 10603440 | Was           | 0.364766942  | 0.198547958  | 0.004658939 | 0.048945895 | 0.086441985 | 0.336860391 | 0.166218985  | 0.28165745   | 0.590145883 | 1.837172976 | 0.292208 |
| 10462507 | Papss2        | -0.393213697 | -0.221153106 | 0.003590381 | 0.04110522  | 0.067704721 | 0.293505282 | -0.172060591 | -0.307183401 | 0.560123333 | 1.778015709 | 0.29292  |
| 10429100 | Lrrc6         | -0.799821691 | -0.564645207 | 0.000152263 | 0.004294834 | 0.002588303 | 0.033790071 | -0.235176484 | -0.682233449 | 0.344715559 | 1.41650311  | 0.293953 |
| 10483536 | 4930578N16Rik | -0.570674854 | -0.355645273 | 0.001235198 | 0.019498808 | 0.023804437 | 0.155039911 | -0.215029581 | -0.463160063 | 0.464266239 | 1.604618132 | 0.294042 |
| 10492330 | P2ry1         | 0.483112396  | 0.303782046  | 0.001132308 | 0.018406637 | 0.021561071 | 0.145601043 | 0.17933035   | 0.393447221  | 0.455792646 | 1.590325702 | 0.295771 |
| 10532954 | Mlec          | 0.542159047  | 0.3848803    | 0.000139866 | 0.004033313 | 0.002328244 | 0.031239609 | 0.157278747  | 0.463519674  | 0.339314069 | 1.408643276 | 0.295902 |
| 10363696 | D630028G08Rik | -0.421608443 | -0.247430694 | 0.00252184  | 0.032388126 | 0.047541718 | 0.239509484 | -0.174177749 | -0.334519569 | 0.520680299 | 1.703945602 | 0.296023 |
| 10473847 | Acp2          | 0.652050117  | 0.449602112  | 0.000260681 | 0.00633764  | 0.004579123 | 0.050250931 | 0.202448006  | 0.550826114  | 0.367535236 | 1.450282596 | 0.296507 |
| 10439009 | Apod          | -0.644797267 | -0.444233934 | 0.000271947 | 0.006535903 | 0.00475156  | 0.051591809 | -0.200563333 | -0.5445156   | 0.368333493 | 1.451481343 | 0.297886 |
| 10351867 | Aim2          | 0.722007035  | 0.418265873  | 0.002989331 | 0.036364997 | 0.054997646 | 0.261318473 | 0.303741162  | 0.570136454  | 0.532751694 | 1.726191595 | 0.29881  |
| 10437195 | Igfs5         | -0.405729991 | -0.232356569 | 0.003391785 | 0.039654451 | 0.061516151 | 0.277699009 | -0.173373422 | -0.31904328  | 0.543416624 | 1.746152445 | 0.300046 |
| 10476620 | Snrbp2        | 0.36727516   | 0.205275201  | 0.004405465 | 0.047018498 | 0.076957694 | 0.315710888 | 0.161999959  | 0.286275181  | 0.565888942 | 1.789184267 | 0.30335  |
| 10428561 | Rad21         | 0.387356382  | 0.226030006  | 0.003026609 | 0.036644816 | 0.053855082 | 0.25833531  | 0.161326376  | 0.306693194  | 0.526018769 | 1.71373876  | 0.304298 |
| 10504650 |               | -0.41934153  | -0.255309169 | 0.001973776 | 0.027092291 | 0.035340825 | 0.199744632 | -0.164032361 | -0.33732535  | 0.486273449 | 1.642485194 | 0.305605 |
| 10358541 | Hmcn1         | -0.604067878 | -0.356143268 | 0.002800576 | 0.034753541 | 0.04952439  | 0.245451255 | -0.24792461  | -0.480105573 | 0.516396025 | 1.69613729  | 0.305939 |
| 10400844 | Pygl          | 0.601500911  | 0.37721113   | 0.001427839 | 0.021520711 | 0.02530313  | 0.161337045 | 0.224289781  | 0.489356021  | 0.458336613 | 1.594600114 | 0.307667 |
| 10603814 | Slc9a7        | 0.585432013  | 0.390134561  | 0.000601348 | 0.011818828 | 0.01034297  | 0.089599508 | 0.195297452  | 0.487783287  | 0.400377498 | 1.50058998  | 0.308659 |
| 10564839 | Ap3s2         | 0.415598349  | 0.247969564  | 0.002584726 | 0.032958143 | 0.04509253  | 0.231124386 | 0.167628785  | 0.331783957  | 0.505234753 | 1.676005485 | 0.308744 |
| 10414333 | Samd4         | -0.518628199 | -0.304559286 | 0.003053356 | 0.036829346 | 0.052804305 | 0.25496255  | -0.214068912 | -0.411593742 | 0.520097588 | 1.702880924 | 0.309052 |
| 10567407 | Thumpd1       | 0.39526155   | 0.228210986  | 0.003611079 | 0.041231834 | 0.061753826 | 0.27824335  | 0.167050563  | 0.311736268  | 0.535871441 | 1.732000531 | 0.309416 |
| 10403258 | Gdi2          | 0.536607621  | 0.345228698  | 0.001057115 | 0.017573858 | 0.01837203  | 0.130810894 | 0.191378923  | 0.44091816   | 0.434046361 | 1.554354037 | 0.310231 |
| 10346651 | Bmpr2         | -0.501841662 | -0.330988913 | 0.000750144 | 0.013704407 | 0.012779148 | 0.103738153 | -0.170852748 | -0.416415287 | 0.410294131 | 1.516188735 | 0.311789 |
| 10565802 | Rps3          | 0.656037486  | 0.426456294  | 0.000935536 | 0.016173432 | 0.016052494 | 0.120322294 | 0.229581192  | 0.54124689   | 0.424170922 | 1.538346357 | 0.311825 |
| 10600973 | Igfbp1        | 0.503948906  | 0.330738639  | 0.0008193   | 0.0146789   | 0.013945403 | 0.110044212 | 0.173210267  | 0.417343772  | 0.415030195 | 1.523707384 | 0.312458 |
| 10356461 | Hjrp          | 0.556737666  | 0.35936063   | 0.001056315 | 0.017573858 | 0.018054048 | 0.129300032 | 0.197377035  | 0.458049148  | 0.430907985 | 1.549245017 | 0.31296  |
| 10547177 | Rassf4        | 0.39768185   | 0.23070229   | 0.003641398 | 0.04144896  | 0.060955877 | 0.276141098 | 0.16697956   | 0.31419207   | 0.531456954 | 1.723788049 | 0.313023 |
| 10566529 | Top1          | 0.497178057  | 0.302004658  | 0.002321211 | 0.03063283  | 0.039306232 | 0.213257173 | 0.195173399  | 0.399591358  | 0.488432484 | 1.646259566 | 0.314335 |
| 10565072 | Sec11a        | 0.596135745  | 0.425956222  | 0.000177752 | 0.004858941 | 0.002680974 | 0.034528475 | 0.170179523  | 0.511045983  | 0.333002369 | 1.399523506 | 0.315569 |
| 10477777 | Ergic3        | 0.474944895  | 0.284806052  | 0.002746993 | 0.034344776 | 0.045757481 | 0.233453196 | 0.190138842  | 0.379875473  | 0.500529399 | 1.667608153 | 0.316226 |
| 10394593 | Fam49a        | -0.559786934 | -0.397704032 | 0.000206915 | 0.005364736 | 0.003139858 | 0.038747058 | -0.162082903 | -0.478745483 | 0.33855756  | 1.407546542 | 0.316835 |
| 10506822 | Orc1l         | 0.470265475  | 0.293186107  | 0.001800344 | 0.025335101 | 0.030052235 | 0.179976847 | 0.177079368  | 0.251725791  | 0.463891549 | 1.603982809 | 0.317495 |
| 10507143 | Cyp4a12a      | -0.549325653 | -0.358115247 | 0.000992773 | 0.016842358 | 0.016451228 | 0.122542945 | -0.191210406 | -0.45372045  | 0.421427789 | 1.533935396 | 0.317814 |
| 10552140 | Cebpa         | 0.378343371  | 0.228348922  | 0.002648405 | 0.03348835  | 0.043628198 | 0.226781811 | 0.14999445   | 0.303346146  | 0.49446631  | 1.656865155 | 0.318357 |

Suppl Table 1

|          |               |              |              |             |             |             |             |              |              |             |             |          |
|----------|---------------|--------------|--------------|-------------|-------------|-------------|-------------|--------------|--------------|-------------|-------------|----------|
| 10600698 | 5430427O19Rik | 0.545735245  | 0.347306353  | 0.001404653 | 0.021283721 | 0.023327971 | 0.153062977 | 0.198428892  | 0.446520799  | 0.444388912 | 1.571336775 | 0.318387 |
| 10544732 | Skap2         | 0.505760496  | 0.322465943  | 0.001376061 | 0.020999252 | 0.022813933 | 0.15100259  | 0.183294553  | 0.414113219  | 0.44261942  | 1.56841523  | 0.31865  |
| 10503966 | Aco1          | 0.466802885  | 0.317913342  | 0.000520155 | 0.010571123 | 0.008212058 | 0.076412228 | 0.148889543  | 0.392358114  | 0.379473593 | 1.468333736 | 0.321399 |
| 10508772 | Fgr           | 0.513758506  | 0.350046969  | 0.000516416 | 0.010525455 | 0.008147886 | 0.075912866 | 0.163711537  | 0.431902737  | 0.379047233 | 1.467684488 | 0.321436 |
| 10399254 | Cenpo         | 0.470473911  | 0.271912603  | 0.004294413 | 0.046217605 | 0.067565209 | 0.293098491 | 0.198561308  | 0.371193257  | 0.534927034 | 1.730239444 | 0.322071 |
| 10452535 |               | 0.561247844  | 0.39161101   | 0.000345366 | 0.007799758 | 0.005229916 | 0.055163976 | 0.169636834  | 0.476429427  | 0.356058682 | 1.433176876 | 0.32398  |
| 10414093 | Glud1         | 0.589104489  | 0.360922037  | 0.002454601 | 0.031804491 | 0.039179174 | 0.212847921 | 0.228182452  | 0.475013263  | 0.480370697 | 1.632220892 | 0.324203 |
| 10392440 | Slc16a6       | 0.434040435  | 0.265783009  | 0.002518773 | 0.032388126 | 0.039873156 | 0.214652722 | 0.168257426  | 0.349911722  | 0.480856785 | 1.633063137 | 0.32551  |
| 10559446 | Lilrb3        | 0.575560649  | 0.399311193  | 0.00040981  | 0.00888255  | 0.006159051 | 0.061802397 | 0.176249455  | 0.487435921  | 0.361584873 | 1.441383709 | 0.327199 |
| 10466573 | Ostf1         | 0.46125911   | 0.285022374  | 0.002447765 | 0.031741808 | 0.037709222 | 0.20770822  | 0.176236736  | 0.373140742  | 0.472306334 | 1.61832597  | 0.33039  |
| 10575476 | Vac14         | 0.422066616  | 0.269992018  | 0.00162516  | 0.02352769  | 0.024981189 | 0.160144144 | 0.152074598  | 0.346029317  | 0.439484723 | 1.563255905 | 0.331623 |
| 10520043 | Lhfp13        | -0.365634462 | -0.214644593 | 0.004344436 | 0.046531818 | 0.064274918 | 0.284610211 | -0.150989869 | -0.290139527 | 0.520404341 | 1.703441291 | 0.33303  |
| 10395925 | Mia2          | 0.654528777  | 0.460313719  | 0.000348365 | 0.007850609 | 0.005002157 | 0.053498067 | 0.194215057  | 0.557421248  | 0.348417033 | 1.421918898 | 0.333041 |
| 10550131 | Pla2g4c       | 0.525688321  | 0.316074993  | 0.003452057 | 0.040091425 | 0.051628065 | 0.251411339 | 0.209613328  | 0.420881657  | 0.498033887 | 1.663175931 | 0.333427 |
| 10554094 | Igf1r         | -0.375264797 | -0.224763817 | 0.003667823 | 0.041675827 | 0.054248915 | 0.259497048 | -0.15050098  | -0.300014307 | 0.501646009 | 1.66959612  | 0.334883 |
| 10423842 | Dca113        | 0.537845746  | 0.383056604  | 0.00277472  | 0.006625263 | 0.003870769 | 0.044929416 | 0.154789142  | 0.460451175  | 0.336168416 | 1.404089475 | 0.335083 |
| 10522788 | Stap1         | 0.697673148  | 0.487345624  | 0.000427842 | 0.009159176 | 0.006091281 | 0.061290083 | 0.210327524  | 0.592509386  | 0.35497754  | 1.431577743 | 0.336848 |
| 10533316 | Erp29         | 0.492077727  | 0.325037417  | 0.001127152 | 0.018351581 | 0.016719945 | 0.123929408 | 0.167040309  | 0.408557572  | 0.408853784 | 1.513911015 | 0.337055 |
| 10435581 | Polq          | 0.704556876  | 0.504324477  | 0.000259813 | 0.006333331 | 0.003556176 | 0.042239672 | 0.200232399  | 0.604440677  | 0.331268901 | 1.397030895 | 0.337459 |
| 10575799 | Plcg2         | 0.599503356  | 0.419334285  | 0.000426959 | 0.009147907 | 0.006030619 | 0.060870834 | 0.180169071  | 0.50941882   | 0.353675725 | 1.429654996 | 0.338189 |
| 10427657 |               | -0.421213733 | -0.251013029 | 0.004074095 | 0.044862231 | 0.058679362 | 0.270603998 | -0.170200704 | -0.336113381 | 0.506378839 | 1.678055256 | 0.338661 |
| 10497066 | Zranb2        | 0.473540039  | 0.281870428  | 0.004135805 | 0.045475843 | 0.059431901 | 0.27294651  | 0.191669611  | 0.377705234  | 0.507458182 | 1.679991912 | 0.338919 |
| 10352267 | Lin9          | 0.546021596  | 0.355313041  | 0.001476583 | 0.022086796 | 0.02159783  | 0.145734253 | 0.190708555  | 0.450667318  | 0.423169258 | 1.536733902 | 0.340186 |
| 10458213 | Etf1          | 0.491411116  | 0.344832151  | 0.000422403 | 0.009072994 | 0.005862393 | 0.059591027 | 0.146579009  | 0.418121656  | 0.350565456 | 1.425073499 | 0.341099 |
| 10359644 | Mett11b       | -0.391426097 | -0.233329149 | 0.004246202 | 0.046066063 | 0.059991756 | 0.274290772 | -0.158096949 | -0.312377623 | 0.506108431 | 1.677570502 | 0.341753 |
| 10512704 | Exosc3        | 0.439045259  | 0.264771273  | 0.003839652 | 0.043075252 | 0.054234021 | 0.259474156 | 0.174273985  | 0.351908266  | 0.495225609 | 1.658205791 | 0.342844 |
| 10399691 | Id2           | 0.501721679  | 0.339298951  | 0.000879942 | 0.01552326  | 0.012418753 | 0.101646861 | 0.162422728  | 0.420510315  | 0.386251472 | 1.478700944 | 0.344502 |
| 10458607 | Lars          | 0.607135135  | 0.426474649  | 0.000451079 | 0.009545183 | 0.006117061 | 0.061477179 | 0.180660485  | 0.516804892  | 0.349571934 | 1.423613656 | 0.345838 |
| 10504666 |               | -0.58221392  | -0.386052939 | 0.001234629 | 0.019498808 | 0.017427413 | 0.126685596 | -0.196160981 | -0.48413343  | 0.405179582 | 1.508119381 | 0.346031 |
| 10567219 | Arl6ip1       | 0.430918799  | 0.265680775  | 0.003200113 | 0.038010409 | 0.044676394 | 0.23013319  | 0.165238024  | 0.348299787  | 0.474413222 | 1.621941968 | 0.346499 |
| 10521759 | Slit2         | -0.405490963 | -0.249110929 | 0.003397736 | 0.039678387 | 0.046963271 | 0.237387403 | -0.156380034 | -0.327300946 | 0.477786685 | 1.627752603 | 0.347892 |
| 10458461 | Hdac3         | 0.566449403  | 0.376471826  | 0.001286569 | 0.02001434  | 0.017704741 | 0.12772493  | 0.189977578  | 0.471460615  | 0.402955352 | 1.504626283 | 0.350659 |
| 10487748 | 4930402H24Rik | -0.405294297 | -0.246572781 | 0.003948756 | 0.043933183 | 0.053276511 | 0.256326426 | -0.158721515 | -0.325933539 | 0.486975093 | 1.64371061  | 0.351067 |
| 10460738 | Cdca5         | 0.477491337  | 0.31920356   | 0.001197017 | 0.019141454 | 0.016352755 | 0.121982713 | 0.158287777  | 0.398347449  | 0.397361092 | 1.495883495 | 0.351721 |
| 10548146 | Tead4         | -0.406113921 | -0.25214352  | 0.003235536 | 0.038324747 | 0.043697892 | 0.226868427 | -0.153970401 | -0.32912872  | 0.467812109 | 1.610645876 | 0.352522 |
| 10597352 |               | -0.387438763 | -0.24397759  | 0.002831646 | 0.035010924 | 0.037982177 | 0.20880842  | -0.143461173 | -0.315708177 | 0.454410698 | 1.588009632 | 0.354589 |
| 10461154 | Snhg1         | 0.618365049  | 0.43087307   | 0.000635534 | 0.0121796   | 0.008278567 | 0.076740429 | 0.18749198   | 0.52461906   | 0.3573869   | 1.435144345 | 0.35626  |
| 10444927 | Nrm           | 0.421882511  | 0.268920178  | 0.002528251 | 0.03243745  | 0.033579244 | 0.192606038 | 0.152962332  | 0.345401344  | 0.442853899 | 1.568801988 | 0.356911 |
| 10425321 | Apobec3       | 0.372924637  | 0.227068184  | 0.004306822 | 0.046320334 | 0.05582961  | 0.262942099 | 0.145856453  | 0.299996411  | 0.486193993 | 1.642346498 | 0.357721 |
| 10542665 | Cmas          | 0.459344655  | 0.304505542  | 0.001505081 | 0.022310191 | 0.019934245 | 0.138289786 | 0.154839113  | 0.381925098  | 0.405417485 | 1.50849358  | 0.357893 |
| 10515822 | Olfr1342      | -0.45391134  | -0.277520246 | 0.004259611 | 0.046066063 | 0.05460832  | 0.260197951 | -0.176391095 | -0.365715793 | 0.482317411 | 1.635597212 | 0.359945 |
| 10391572 | Lsm12         | 0.359746607  | 0.220408051  | 0.004172795 | 0.045690669 | 0.053527974 | 0.257295137 | 0.139338556  | 0.290077329  | 0.480349692 | 1.63218451  | 0.360038 |
| 10506767 | Echdc2        | -0.50884035  | -0.361051905 | 0.00048591  | 0.010090879 | 0.006069011 | 0.061137899 | -0.147788445 | -0.434946128 | 0.339785633 | 1.409327422 | 0.361219 |
| 10451665 | Apobec2       | -0.616134731 | -0.390569621 | 0.002895312 | 0.035558304 | 0.037423292 | 0.206652327 | -0.22556511  | -0.503352176 | 0.448125827 | 1.577528558 | 0.361349 |
| 10444244 | Tap1          | 0.401087605  | 0.260996922  | 0.002123096 | 0.028651749 | 0.027353812 | 0.169266548 | 0.140090682  | 0.331042263  | 0.423180656 | 1.536752238 | 0.362978 |
| 10483679 | Gpr155        | -0.386048849 | -0.238253718 | 0.004064246 | 0.044811453 | 0.051235279 | 0.250163045 | -0.147795131 | -0.312151283 | 0.473472763 | 1.620326649 | 0.363612 |
| 10364990 | Eef2          | 0.535793571  | 0.369094977  | 0.000909249 | 0.01585786  | 0.011457589 | 0.096203269 | 0.166698594  | 0.452444274  | 0.368440056 | 1.451641459 | 0.364896 |
| 10591192 | Olfr47        | 0.454289559  | 0.294178044  | 0.002353374 | 0.030914229 | 0.029890696 | 0.179470034 | 0.160111515  | 0.374233801  | 0.427838198 | 1.544267387 | 0.365412 |
| 10510265 | Nppa          | -0.606543313 | -0.410438921 | 0.001244434 | 0.019608423 | 0.015747026 | 0.118566927 | -0.196104392 | -0.508491117 | 0.385659427 | 1.477791902 | 0.365684 |
| 10493585 | Ube2q1        | 0.427248812  | 0.282003915  | 0.001855833 | 0.025987734 | 0.023409306 | 0.153371865 | 0.145244897  | 0.354626364  | 0.409571626 | 1.515045674 | 0.367003 |
| 10428398 | Eif3e         | 0.472017134  | 0.298505628  | 0.003420083 | 0.0398668   | 0.041865353 | 0.221314277 | 0.173511507  | 0.385261381  | 0.450373474 | 1.581267121 | 0.37063  |
| 10456891 | Atp5a1        | 0.553102255  | 0.365753996  | 0.001972708 | 0.027092275 | 0.024152515 | 0.156789768 | 0.187348259  | 0.459428126  | 0.407785786 | 1.512224778 | 0.37254  |
| 10500780 | Nr1h5         | 0.403277458  | 0.26156132   | 0.002597572 | 0.033056256 | 0.031603157 | 0.185669452 | 0.141716138  | 0.332419389  | 0.426317304 | 1.541808466 | 0.373195 |
| 10597273 | Rtp3          | -0.449022312 | -0.303997807 | 0.001426608 | 0.021514795 | 0.017254769 | 0.126182037 | -0.145024505 | -0.37651006  | 0.385180956 | 1.477057734 | 0.374453 |
| 10550052 | Rps5          | 0.71321307   | 0.488559119  | 0.001216112 | 0.019304363 | 0.014514179 | 0.112560737 | 0.224653951  | 0.600886095  | 0.37387111  | 1.459829613 | 0.376393 |
| 10590830 | AK129341      | -0.867004122 | -0.609305926 | 0.000819355 | 0.0146789   | 0.009474537 | 0.084164245 | -0.257698196 | -0.738155024 | 0.349111214 | 1.422937289 | 0.380023 |

Suppl Table 1

|          |               |              |              |              |              |             |             |              |              |             |             |          |
|----------|---------------|--------------|--------------|--------------|--------------|-------------|-------------|--------------|--------------|-------------|-------------|----------|
| 10397264 | 7420416P09Rik | -0.38431977  | -0.24034815  | 0.004497736  | 0.047666349  | 0.051643665 | 0.251439606 | -0.143971619 | -0.31233396  | 0.460954099 | 1.599012803 | 0.380753 |
| 10436666 | Jam2          | -0.413116537 | -0.275892142 | 0.00201059   | 0.027509505  | 0.023316598 | 0.153062977 | -0.137224396 | -0.344504339 | 0.398324143 | 1.497384213 | 0.382781 |
| 10461497 | Ddb1          | 0.399165622  | 0.257972993  | 0.003153296  | 0.037593005  | 0.036296316 | 0.203151734 | 0.141192629  | 0.328569307  | 0.42971947  | 1.547315543 | 0.382973 |
| 10351035 | Gas5          | 0.720009714  | 0.481665767  | 0.001988395  | 0.0027263959 | 0.022952691 | 0.15176447  | 0.238343947  | 0.600837741  | 0.396686045 | 1.494832649 | 0.383667 |
| 10548030 | Cd9           | 0.453353215  | 0.291255281  | 0.003455177  | 0.040091425  | 0.039425795 | 0.213257193 | 0.162097934  | 0.372304248  | 0.435391041 | 1.556549339 | 0.384135 |
| 10471844 | Nek6          | 0.436905382  | 0.29859503   | 0.001507436  | 0.02231423   | 0.017063049 | 0.125422202 | 0.138310352  | 0.367750206  | 0.376098639 | 1.463203797 | 0.387082 |
| 10560260 | Sae1          | 0.473577976  | 0.329024379  | 0.001197646  | 0.019141454  | 0.013293704 | 0.106432565 | 0.144553596  | 0.401301177  | 0.360212241 | 1.439340078 | 0.389997 |
| 10436392 | Cpox          | 0.479654993  | 0.34118922   | 0.000780465  | 0.014147574  | 0.008511059 | 0.078235789 | 0.138465772  | 0.410422107  | 0.33737406  | 1.405832788 | 0.390697 |
| 10404132 | Cmah          | 0.390777848  | 0.250869763  | 0.00386192   | 0.04325859   | 0.042370462 | 0.222907364 | 0.139908085  | 0.320823805  | 0.436090099 | 1.557692101 | 0.39109  |
| 10516859 | Ythdf2        | 0.354766877  | 0.224461507  | 0.004652682  | 0.048944693  | 0.050346231 | 0.247602707 | 0.130305371  | 0.289614192  | 0.449927436 | 1.580524352 | 0.392221 |
| 10374442 | C1d           | 0.517228182  | 0.346743058  | 0.002342887  | 0.03087127   | 0.025345279 | 0.161429933 | 0.170485124  | 0.43198562   | 0.394654627 | 1.491675665 | 0.396064 |
| 10598203 | Ccl28         | -0.409037912 | -0.263249572 | 0.004156028  | 0.045530431  | 0.043879    | 0.227486602 | -0.14578834  | -0.336143742 | 0.433708327 | 1.553802761 | 0.398192 |
| 10559816 |               | 0.531794601  | 0.370805118  | 0.00133779   | 0.020598923  | 0.014101723 | 0.11083277  | 0.160989483  | 0.45129986   | 0.356723982 | 1.434161977 | 0.400402 |
| 10489253 | Zhx3          | -0.417489632 | -0.292154805 | 0.00127937   | 0.019951434  | 0.013393457 | 0.106997586 | -0.125334826 | -0.354822218 | 0.353232745 | 1.42990142  | 0.401557 |
| 10421730 | AU021034      | -0.425794266 | -0.279926338 | 0.003391044  | 0.039654451  | 0.035276223 | 0.19953065  | -0.145867928 | -0.352860302 | 0.413387187 | 1.521093973 | 0.402544 |
| 10405576 | Fbxl21        | -0.356598042 | -0.231100879 | 0.00418147   | 0.045711236  | 0.042798921 | 0.224138744 | -0.125497163 | -0.29384946  | 0.427079779 | 1.543040611 | 0.404416 |
| 10354275 | 1700029F09Rik | 0.487146247  | 0.348395699  | 0.000903425  | 0.015796397  | 0.009186318 | 0.082273002 | 0.138750548  | 0.417770973  | 0.332121082 | 1.398255627 | 0.405252 |
| 10426467 | Tmem117       | -0.504259836 | -0.328031384 | 0.004218952  | 0.045962718  | 0.042369031 | 0.222907364 | -0.176228452 | -0.41614561  | 0.423477858 | 1.53723046  | 0.408219 |
| 10427035 | Nr4a1         | -0.45476883  | -0.320748866 | 0.001242331  | 0.019587323  | 0.012557496 | 0.120455753 | -0.134019964 | -0.387758848 | 0.345627095 | 1.417834569 | 0.408281 |
| 10356508 |               | -0.38670058  | -0.261812739 | 0.002519397  | 0.032388126  | 0.025379916 | 0.161570359 | -0.12488784  | -0.32425666  | 0.385151197 | 1.477012084 | 0.410049 |
| 10549171 | 5730419I09Rik | 0.412714611  | 0.266426646  | 0.004777956  | 0.049914768  | 0.047229866 | 0.238265764 | 0.146287965  | 0.339570628  | 0.430802764 | 1.54907408  | 0.410382 |
| 10509163 | Id3           | -0.423801682 | -0.282343172 | 0.003244417  | 0.038376818  | 0.03232251  | 0.188258266 | -0.14445851  | -0.353072427 | 0.40065012  | 1.501016226 | 0.41148  |
| 10466963 | 9930021J03Rik | -0.591366367 | -0.390064614 | 0.003722435  | 0.04212851   | 0.036908569 | 0.205102651 | -0.201301753 | -0.490715491 | 0.410220905 | 1.516072839 | 0.411708 |
| 10413381 | Asb14         | -0.408386979 | -0.277087119 | 0.002506563  | 0.032314648  | 0.025035817 | 0.160305507 | -0.13129986  | -0.342737049 | 0.383092111 | 1.473857681 | 0.41177  |
| 10519516 | Slc25a40      | 0.42064074   | 0.281506202  | 0.003125905  | 0.03732548   | 0.030909312 | 0.18301735  | 0.139134538  | 0.351073471  | 0.396311741 | 1.494250349 | 0.413161 |
| 10445061 | Rnf39         | -0.375996035 | -0.25483385  | 0.002775975  | 0.034601226  | 0.026948576 | 0.167723944 | -0.121162185 | -0.315414942 | 0.384135842 | 1.475455613 | 0.417293 |
| 10367282 | Cnpy2         | 0.373205321  | 0.250693205  | 0.003160374  | 0.03762545   | 0.030609947 | 0.181789938 | 0.122512116  | 0.311949263  | 0.392730905 | 1.488693407 | 0.417326 |
| 10366667 | Gns           | 0.493416383  | 0.328051589  | 0.003724392  | 0.042132083  | 0.03566815  | 0.200906314 | 0.165364793  | 0.410733986  | 0.402608012 | 1.504081672 | 0.418818 |
| 10467124 | Acta2         | 0.645054161  | 0.442286308  | 0.002414609  | 0.031476989  | 0.023201677 | 0.152859505 | 0.202767854  | 0.543670234  | 0.372961109 | 1.458453834 | 0.419631 |
| 10599498 | Utp14a        | 0.446239877  | 0.314776621  | 0.001517421  | 0.022436159  | 0.014489916 | 0.112466633 | 0.131463256  | 0.380508249  | 0.34549384  | 1.417639835 | 0.420365 |
| 10607467 | 03/01/12      | 0.5700924    | 0.385934299  | 0.002999658  | 0.036404365  | 0.028533801 | 0.174133523 | 0.184158101  | 0.47801335   | 0.385257235 | 1.477174747 | 0.421207 |
| 10496023 | Casp6         | 0.556859422  | 0.390584995  | 0.001771966  | 0.025045609  | 0.016679263 | 0.123735062 | 0.166274427  | 0.473722209  | 0.350995634 | 1.425706131 | 0.423662 |
| 10580582 | 4933436C20Rik | -0.392894927 | -0.260183788 | 0.0044233045 | 0.046002788  | 0.039393388 | 0.213257193 | -0.132711139 | -0.326539358 | 0.406416978 | 1.510066903 | 0.423914 |
| 10574632 | Cbfb          | 0.420337234  | 0.296830205  | 0.001588541  | 0.023141128  | 0.014885177 | 0.114153789 | 0.12350703   | 0.358583719  | 0.34443011  | 1.416086463 | 0.42431  |
| 10505182 | Gng10         | 0.436877619  | 0.312092079  | 0.001378063  | 0.021017307  | 0.012610825 | 0.102792839 | 0.12478554   | 0.374484849  | 0.333219195 | 1.399835652 | 0.428594 |
| 10549341 | 4933424B01Rik | 0.362266367  | 0.24092883   | 0.004345363  | 0.046531818  | 0.039338392 | 0.213257193 | 0.121337537  | 0.301597598  | 0.402315992 | 1.503623983 | 0.4295   |
| 10465912 | Fen1          | 0.493081418  | 0.346289418  | 0.001920279  | 0.026585608  | 0.01753894  | 0.12699281  | 0.146792     | 0.419685418  | 0.34976674  | 1.423899758 | 0.429921 |
| 10537909 | Rny3          | 1.295406214  | 0.879429911  | 0.00347617   | 0.040210151  | 0.031067745 | 0.183616728 | 0.415976303  | 1.087418063  | 0.382535768 | 1.473006772 | 0.433529 |
| 10541695 | Lpcat3        | 0.50341274   | 0.352463829  | 0.002155177  | 0.028985256  | 0.019325773 | 0.135375232 | 0.150948911  | 0.427938284  | 0.352735234 | 1.428267807 | 0.433797 |
| 10345550 | LOC100046859  | -0.415480965 | -0.285611663 | 0.002978114  | 0.036280132  | 0.026430345 | 0.165709355 | -0.129869302 | -0.350546314 | 0.370476871 | 1.454705876 | 0.435564 |
| 10580349 | Mylk3         | -0.440896377 | -0.309275058 | 0.002156735  | 0.028985256  | 0.019151095 | 0.134382259 | -0.131621319 | -0.375085718 | 0.350909973 | 1.425580128 | 0.43582  |
| 10351703 | Copa          | 0.472423362  | 0.33611881   | 0.001702531  | 0.024372875  | 0.015028579 | 0.115047294 | 0.136304552  | 0.404271086  | 0.337161269 | 1.405524917 | 0.436679 |
| 10586722 | F830001A07Rik | -0.39118161  | -0.264820088 | 0.003798823  | 0.042710553  | 0.03336632  | 0.191831435 | -0.126361522 | -0.328000849 | 0.385247546 | 1.477159883 | 0.436735 |
| 10562132 | Cd22          | 0.396739489  | 0.269467152  | 0.003646246  | 0.041467361  | 0.031999893 | 0.187382338 | 0.127272337  | 0.33310332   | 0.382080663 | 1.472311139 | 0.437123 |
| 10508479 | Ptp4a2        | 0.41768307   | 0.283893622  | 0.003693226  | 0.041897363  | 0.032169882 | 0.187702737 | 0.133789448  | 0.350788346  | 0.3813965   | 1.471266126 | 0.438641 |
| 10352709 | Nsl1          | 0.384822344  | 0.261626388  | 0.00369385   | 0.041897363  | 0.032136063 | 0.187702737 | 0.123195956  | 0.323224366  | 0.381146872 | 1.470885055 | 0.438898 |
| 10596135 |               | -0.513638491 | -0.346215304 | 0.004209053  | 0.045914986  | 0.036376009 | 0.203331749 | -0.167423187 | -0.429926897 | 0.389422454 | 1.483581128 | 0.439542 |
| 10575616 | Gabarapl2     | -0.428129992 | -0.290679766 | 0.003931991  | 0.043823856  | 0.033568337 | 0.192921313 | -0.137450226 | -0.359404879 | 0.382438397 | 1.472857906 | 0.441766 |
| 10516943 | Atpi1f1       | 0.393653948  | 0.265995463  | 0.004206344  | 0.045909007  | 0.035972642 | 0.20213349  | 0.127658485  | 0.329824706  | 0.387049491 | 1.4799273   | 0.441784 |
| 10365420 | Al597468      | 0.374341802  | 0.254816299  | 0.003876344  | 0.0433165    | 0.032997209 | 0.19051172  | 0.119525503  | 0.314579051  | 0.379953791 | 1.469065375 | 0.443262 |
| 10361509 | Syne1         | -0.442663354 | -0.308979024 | 0.002656522  | 0.033568201  | 0.022706725 | 0.150535006 | -0.133684331 | -0.375821189 | 0.355712596 | 1.432664745 | 0.443668 |
| 10565759 | Uvrag         | 0.462950782  | 0.321352456  | 0.003023108  | 0.036619692  | 0.025497969 | 0.16212085  | 0.141598326  | 0.392151619  | 0.36108056  | 1.44063247  | 0.44622  |
| 10367641 | Mthfd1l       | 0.378185113  | 0.255700835  | 0.004456509  | 0.047385942  | 0.037258978 | 0.206024008 | 0.122484279  | 0.316942974  | 0.386455258 | 1.479013996 | 0.446239 |
| 10367106 | Atp5b         | 0.494175281  | 0.351325484  | 0.002116915  | 0.028593681  | 0.01764153  | 0.127412153 | 0.142849797  | 0.422750383  | 0.337905778 | 1.460602434 | 0.449037 |
| 10354555 | Asnsd1        | 0.505688219  | 0.35452265   | 0.00269645   | 0.033911066  | 0.02245457  | 0.149510737 | 0.151165569  | 0.430105434  | 0.351461657 | 1.426391851 | 0.449146 |
| 10560624 | Apoe          | 0.417489111  | 0.293818385  | 0.002566728  | 0.032777494  | 0.021284921 | 0.144238813 | 0.123670726  | 0.355653748  | 0.347727885 | 1.420908738 | 0.450088 |

Suppl Table 1

|          |         |              |              |             |             |             |             |              |              |             |             |          |
|----------|---------|--------------|--------------|-------------|-------------|-------------|-------------|--------------|--------------|-------------|-------------|----------|
| 10554281 | Fanci   | 0.390547915  | 0.267455938  | 0.003976807 | 0.044169923 | 0.032671347 | 0.189515962 | 0.123091977  | 0.329001927  | 0.374137556 | 1.460232731 | 0.450719 |
| 10362036 | Hbs1l   | 0.42770746   | 0.301853027  | 0.00253205  | 0.032447656 | 0.020790397 | 0.141992793 | 0.125854433  | 0.364780243  | 0.34501439  | 1.416939444 | 0.452196 |
| 10417713 | Rarb    | -0.360731647 | -0.248643342 | 0.003935413 | 0.043840943 | 0.03151148  | 0.185173231 | -0.112088305 | -0.304687495 | 0.367879572 | 1.450799544 | 0.456315 |
| 10514072 | Zdhhc21 | 0.449516349  | 0.319098059  | 0.002519465 | 0.032388126 | 0.020120233 | 0.139053887 | 0.13041829   | 0.384307204  | 0.339359472 | 1.408709128 | 0.458111 |
| 10419744 | Slc7a7  | 0.597390748  | 0.425257573  | 0.002398988 | 0.031289242 | 0.019158686 | 0.134398782 | 0.172133175  | 0.51132416   | 0.336641975 | 1.40477392  | 0.458116 |
| 10521243 | Grk4    | -0.426449952 | -0.299151225 | 0.00308386  | 0.037040954 | 0.024578326 | 0.158633975 | -0.127298727 | -0.362800589 | 0.35087795  | 1.425533028 | 0.458246 |
| 10551185 | Tgfb1   | 0.38592472   | 0.269203586  | 0.003768894 | 0.042467062 | 0.028977008 | 0.175951893 | 0.116721134  | 0.327564153  | 0.356330608 | 1.433579417 | 0.465349 |
| 10599612 | Phf6    | 0.377097938  | 0.261288788  | 0.004220591 | 0.045962718 | 0.032262895 | 0.188039055 | 0.11580915   | 0.319193363  | 0.362818163 | 1.443222805 | 0.466046 |
| 10441620 | Fgfr1op | 0.42755984   | 0.298623582  | 0.004440719 | 0.047257205 | 0.032220129 | 0.187855811 | 0.128936258  | 0.363091711  | 0.355106587 | 1.431768507 | 0.477288 |
| 10554521 | Pde8a   | -0.479823447 | -0.335855494 | 0.004338094 | 0.04649278  | 0.031401895 | 0.184825461 | -0.143967953 | -0.407839471 | 0.35300152  | 1.428660407 | 0.477942 |
| 10565456 | Prss23  | -0.402022856 | -0.281171338 | 0.004448385 | 0.047319164 | 0.032060622 | 0.187627007 | -0.120851518 | -0.341597097 | 0.353783796 | 1.429814498 | 0.478768 |
| 10563101 | Rpl13a  | 0.526570748  | 0.375452666  | 0.003643645 | 0.041456154 | 0.025540351 | 0.162350107 | 0.151118082  | 0.451011707  | 0.335064654 | 1.402495694 | 0.485882 |
| 10456317 | Zfp532  | -0.402512909 | -0.283342858 | 0.004667966 | 0.049005048 | 0.032183253 | 0.187702737 | -0.119170051 | -0.342927884 | 0.347507615 | 1.420586041 | 0.488442 |
| 10479743 | Gm14496 | -0.383752347 | -0.271401982 | 0.004355299 | 0.046618772 | 0.030040876 | 0.179950806 | -0.112350365 | -0.327577164 | 0.342973739 | 1.413962949 | 0.488731 |
| 10453717 | Fabp5l2 | 0.4594095    | 0.328209604  | 0.003825984 | 0.042978278 | 0.026186146 | 0.164862888 | 0.131199895  | 0.393809552  | 0.333155696 | 1.399744229 | 0.491052 |
