# Supplementary material
Source: PubMed Central journal article supplement (PMC3497801)
Supplement: 1205374109_sd02.pdf [file 1205374109_sd02.pdf]

**Dataset S2: Functional enrichment analysis of genes that are differentially expressed between NIH and Tgfbm2/3 mice**

**A. OVA treatment (NIH x Tgfbm2/3)**

| <b>Term</b>           | <b>Count</b> | <b>P-Value</b> |
|-----------------------|--------------|----------------|
| inflammatory response | 9            | 6.20E-07       |
| secreted              | 30           | 4.60E-05       |
| macrophage            | 4            | 1.30E-04       |
| cytokine              | 9            | 2.00E-04       |
| immunoregulation      | 3            | 5.20E-04       |
| lymphokine            | 3            | 5.40E-03       |
| disulfide bond        | 36           | 5.80E-03       |
| inflammation          | 3            | 1.10E-02       |
| pyrogen               | 2            | 1.90E-02       |
| chemotaxis            | 4            | 1.90E-02       |
| acute phase           | 3            | 1.90E-02       |
| signal                | 39           | 2.00E-02       |
| glycoprotein          | 45           | 2.90E-02       |
| receptor              | 32           | 3.90E-02       |
| ribonucleoprotein     | 7            | 3.90E-02       |
| mitogen               | 3            | 4.30E-02       |

**B. Saline treatment (NIH x Tgfbm2/3)**

| <b>Term</b>              | <b>Count</b> | <b>P-Value</b> |
|--------------------------|--------------|----------------|
| cell cycle               | 15           | 2.40E-03       |
| ribonucleoprotein        | 10           | 8.60E-03       |
| ribosomal protein        | 8            | 8.80E-03       |
| protein kinase inhibitor | 3            | 1.00E-02       |
| endoplasmic reticulum    | 17           | 1.70E-02       |
| methylation              | 8            | 2.50E-02       |
| acetylation              | 42           | 2.80E-02       |
| mitosis                  | 7            | 3.10E-02       |
| mitochondrion inner mem  | 7            | 3.30E-02       |
| respiratory chain        | 4            | 4.60E-02       |
