# Supplementary material
Source: PubMed Central journal article supplement (PMC3497801)
Supplement: 1205374109_sd03.pdf [file 1205374109_sd03.pdf]

Dataset S 3A: Differential expression between congenic *Tgfbm2/3* and NIH mice after OVA exposure

| Probe ID        | GeneName      | GeneDescription                                                        | logFC           | AveExpr        | t              | P.Value            | adj.P.Val       | NumExpectedFalse | B               |
|-----------------|---------------|------------------------------------------------------------------------|-----------------|----------------|----------------|--------------------|-----------------|------------------|-----------------|
| 10362424        | Trdn          | triadin                                                                | 1.34718         | 5.9578         | 10.0458        | 1.65E-07           | 0.00422343      | 0.00422343       | -1.04007        |
| 10479975        | NA            | NA                                                                     | 1.29194         | 7.92893        | 8.18989        | 1.68E-06           | 0.0215638       | 0.0431277        | -1.31758        |
| 10478523        | NA            | NA                                                                     | 0.951301        | 7.03248        | 6.6663         | 1.52E-05           | 0.129789        | 0.389367         | -1.66939        |
| 10358597        | Hmcn1         | hemicentin 1                                                           | -0.650418       | 7.65368        | -5.80577       | 6.02E-05           | 0.276885        | 1.10754          | -1.94281        |
| 10593191        | NA            | NA                                                                     | 0.798801        | 4.985          | 5.80283        | 6.05E-05           | 0.276885        | 1.38442          | -1.94386        |
| 10545239        | NA            | NA                                                                     | 0.662417        | 6.26493        | 5.76191        | 6.47E-05           | 0.276885        | 1.66131          | -1.95855        |
| 10402981        | Gm900         | predicted gene 900                                                     | -0.608185       | 6.9832         | -5.2156        | 0.000164278        | 0.507906        | 3.55534          | -2.17118        |
| 10600031        | 2610030H06Rik | RIKEN cDNA 2610030H06 gene                                             | 0.560373        | 5.97907        | 5.13359        | 0.000189601        | 0.507906        | 4.06324          | -2.20588        |
| 10545220        | Igk           | immunoglobulin kappa chain complex                                     | -0.78989        | 5.97085        | -5.112         | 0.000196923        | 0.507906        | 4.57115          | -2.21514        |
| 10470318        | NA            | NA                                                                     | 1.18437         | 6.55678        | 5.10926        | 0.000197875        | 0.507906        | 5.07906          | -2.21632        |
| 10516211        | Ndufs5        | NADH dehydrogenase (ubiquinone) Fe-S protein 5                         | -0.552032       | 7.24281        | -4.89968       | 0.000286806        | 0.632071        | 6.95278          | -2.3091         |
| 10462623        | Ifit1         | interferon-induced protein with tetratricopeptide repeats 1            | 0.520966        | 8.18334        | 4.87334        | 0.000300624        | 0.632071        | 7.58485          | -2.32112        |
| 10392096        | NA            | NA                                                                     | -0.572155       | 7.82419        | -4.83824       | 0.000320123        | 0.632071        | 8.21692          | -2.33727        |
| 10473483        | Olfr1029      | olfactory receptor 1029                                                | 0.528364        | 5.13583        | 4.58362        | 0.000507403        | 0.859325        | 12.0305          | -2.45888        |
| 10423894        | Tm7sf4        | transmembrane 7 superfamily member 4                                   | 0.52594         | 6.32793        | 4.48311        | 0.000609915        | 0.859325        | 12.8899          | -2.50907        |
| 10530465        | NA            | NA                                                                     | -0.867224       | 3.8017         | -4.46676       | 0.000628518        | 0.859325        | 13.7492          | -2.51735        |
| 10489909        | Ube2v1        | ubiquitin-conjugating enzyme E2 variant 1                              | 0.446901        | 6.15296        | 4.4647         | 0.000630912        | 0.859325        | 14.6085          | -2.5184         |
| 10353674        | Lsm5          | LSM5 homolog, U6 small nuclear RNA associated ( <i>S. cerevisiae</i> ) | -0.588147       | 6.25086        | -4.45191       | 0.000645924        | 0.859325        | 15.4678          | -2.5249         |
| <b>10493856</b> | <b>Sprr2a</b> | <b>small proline-rich protein 2A</b>                                   | <b>0.551714</b> | <b>8.77149</b> | <b>4.43239</b> | <b>0.000669569</b> | <b>0.859325</b> | <b>16.3272</b>   | <b>-2.53487</b> |
| <b>10493858</b> | <b>Sprr2a</b> | <b>small proline-rich protein 2A</b>                                   | <b>0.551714</b> | <b>8.77149</b> | <b>4.43239</b> | <b>0.000669569</b> | <b>0.859325</b> | <b>17.1865</b>   | <b>-2.53487</b> |
| 10548345        | Klrk1         | killer cell lectin-like receptor subfamily K, member 1                 | 0.517037        | 5.93176        | 4.26385        | 0.000914875        | 0.999875        | 20.9974          | -2.62293        |
| <b>10520452</b> | <b>Il6</b>    | <b>interleukin 6</b>                                                   | <b>0.670605</b> | <b>5.71303</b> | <b>4.25289</b> | <b>0.000933724</b> | <b>0.999875</b> | <b>21.9972</b>   | <b>-2.62877</b> |
| 10516037        | Gm12888       | predicted gene 12888                                                   | 0.431671        | 5.12706        | 4.23106        | 0.000972501        | 0.999875        | 22.9971          | -2.64047        |
| 10423738        | NA            | NA                                                                     | 0.475707        | 4.95353        | 4.22821        | 0.000977683        | 0.999875        | 23.997           | -2.642          |
| 10521964        | Gm10440       | predicted gene 10440                                                   | 0.469473        | 7.24226        | 4.17577        | 0.00107829         | 0.999875        | 24.9969          | -2.67036        |
| 10346067        | NA            | NA                                                                     | 0.608627        | 4.40463        | 4.16088        | 0.00110874         | 0.999875        | 25.9967          | -2.67847        |
| 10403036        | Igh           | immunoglobulin heavy chain complex                                     | 1.85249         | 5.42879        | 4.13689        | 0.00115971         | 0.999875        | 26.9966          | -2.69161        |
| 10586814        | NA            | NA                                                                     | 0.493698        | 4.94315        | 4.12679        | 0.00118188         | 0.999875        | 27.9965          | -2.69716        |
| 10360367        | Gm4955        | predicted gene 4955                                                    | 0.565674        | 6.00916        | 4.10076        | 0.00124106         | 0.999875        | 28.9964          | -2.71153        |
| 10591127        | Fat3          | FAT tumor suppressor homolog 3 ( <i>Drosophila</i> )                   | -0.491685       | 6.70898        | -4.07706       | 0.00129757         | 0.999875        | 29.9962          | -2.72468        |
| <b>10559043</b> | <b>Muc5ac</b> | <b>mucin 5, subtypes A and C, tracheobronchial/gastric</b>             | <b>0.445971</b> | <b>7.43266</b> | <b>4.01528</b> | <b>0.00145765</b>  | <b>0.999875</b> | <b>30.9961</b>   | <b>-2.7593</b>  |
| 10415431        | Mcpt1         | mast cell protease 1                                                   | 0.57089         | 5.75791        | 4.00998        | 0.00147229         | 0.999875        | 31.996           | -2.76229        |
| 10373620        | Olfr772       | olfactory receptor 772                                                 | 0.515802        | 4.22988        | 3.99219        | 0.00152256         | 0.999875        | 32.9959          | -2.77236        |
| 10595145        | Gm8074        | predicted gene 8074                                                    | 0.50406         | 6.18973        | 3.94099        | 0.00167728         | 0.999875        | 33.9957          | -2.80155        |

|          |               |                                                                     |           |         |          |            |          |         |          |
|----------|---------------|---------------------------------------------------------------------|-----------|---------|----------|------------|----------|---------|----------|
| 10606184 | NA            | NA                                                                  | 0.451705  | 3.97197 | 3.92434  | 0.00173101 | 0.999875 | 34.9956 | -2.81112 |
| 10523138 | Cxcl3         | chemokine (C-X-C motif) ligand 3                                    | 0.47337   | 7.0682  | 3.91643  | 0.00175712 | 0.999875 | 35.9955 | -2.81567 |
| 10474223 | Cd59b         | CD59b antigen                                                       | 0.527244  | 5.66321 | 3.88812  | 0.001854   | 0.999875 | 36.9954 | -2.83204 |
| 10395365 | Agr2          | anterior gradient 2 ( <i>Xenopus laevis</i> )                       | 0.763215  | 7.91965 | 3.86815  | 0.00192563 | 0.999875 | 37.9952 | -2.84365 |
| 10538636 | V1rc2         | vomeroneasal 1 receptor, C2                                         | 0.423502  | 5.05432 | 3.86015  | 0.00195509 | 0.999875 | 38.9951 | -2.84831 |
| 10563597 | Saa3          | serum amyloid A 3                                                   | 0.576491  | 7.10313 | 3.83264  | 0.00206    | 0.999875 | 39.995  | -2.86441 |
| 10508972 | Gm5589        | predicted gene 5589                                                 | -0.456591 | 6.66161 | -3.82862 | 0.00207584 | 0.999875 | 40.9949 | -2.86677 |
| 10477475 | Plunc         | palate, lung, and nasal epithelium associated                       | 1.23204   | 7.69735 | 3.8155   | 0.00212828 | 0.999875 | 41.9947 | -2.87449 |
| 10559580 | Syt5          | synaptotagmin V                                                     | 0.426426  | 6.8363  | 3.81065  | 0.00214801 | 0.999875 | 42.9946 | -2.87734 |
| 10537296 | NA            | NA                                                                  | -0.461023 | 5.93981 | -3.79211 | 0.00222518 | 0.999875 | 43.9945 | -2.88829 |
| 10475517 | AA467197      | expressed sequence AA467197                                         | 0.402496  | 6.1999  | 3.7853   | 0.0022542  | 0.999875 | 44.9944 | -2.89232 |
| 10544286 | Moxd2         | monooxygenase, DBH-like 2                                           | 0.429608  | 5.56462 | 3.76609  | 0.00233824 | 0.999875 | 45.9942 | -2.90373 |
| 10432810 | Krt74         | keratin 74                                                          | -0.414302 | 5.70334 | -3.7548  | 0.00238914 | 0.999875 | 46.9941 | -2.91045 |
| 10395374 | Gm5434        | ubiquitin-conjugating enzyme E2F (putative) pseudogene              | 0.543584  | 5.1903  | 3.74654  | 0.00242707 | 0.999875 | 47.994  | -2.91538 |
| 10544687 | Cycc          | cytochrome c, somatic                                               | 0.566465  | 6.05379 | 3.7345   | 0.00248348 | 0.999875 | 48.9939 | -2.92258 |
| 10594798 | NA            | NA                                                                  | -0.468331 | 5.30487 | -3.72245 | 0.00254125 | 0.999875 | 49.9937 | -2.9298  |
| 10376404 | Olfr320       | olfactory receptor 320                                              | 0.41696   | 7.89181 | 3.7088   | 0.00260836 | 0.999875 | 50.9936 | -2.93801 |
| 10441392 | Cldn20        | claudin 20                                                          | -0.399303 | 7.45532 | -3.70297 | 0.00263755 | 0.999875 | 51.9935 | -2.94151 |
| 10384797 | Ccdc85a       | coiled-coil domain containing 85A                                   | -0.423279 | 8.59158 | -3.70123 | 0.00264635 | 0.999875 | 52.9934 | -2.94256 |
| 10390080 | Tmem92        | transmembrane protein 92                                            | 0.437062  | 4.98923 | 3.68325  | 0.00273885 | 0.999875 | 53.9932 | -2.95342 |
| 10513583 | Cdc26         | cell division cycle 26                                              | -0.40639  | 6.84677 | -3.6536  | 0.00289865 | 0.999875 | 54.9931 | -2.9714  |
| 10382523 | 4933422H20Rik | RIKEN cDNA 4933422H20 gene                                          | 0.391161  | 6.13608 | 3.64936  | 0.00292229 | 0.999875 | 55.993  | -2.97398 |
| 10472050 | Tnfaip6       | tumor necrosis factor alpha induced protein 6                       | 0.409959  | 6.12863 | 3.6447   | 0.00294847 | 0.999875 | 56.9929 | -2.97682 |
| 10507777 | 9530002B09Rik | RIKEN cDNA 9530002B09 gene                                          | 0.380831  | 5.54145 | 3.64342  | 0.00295568 | 0.999875 | 57.9927 | -2.9776  |
| 10358581 | Hmcn1         | hemimentin 1                                                        | -0.483279 | 10.1578 | -3.6362  | 0.00299681 | 0.999875 | 58.9926 | -2.982   |
| 10526217 | Rfc2          | replication factor C (activator 1) 2                                | -0.455153 | 6.63206 | -3.60847 | 0.00316029 | 0.999875 | 59.9925 | -2.99897 |
| 10363187 | NA            | NA                                                                  | 0.385954  | 4.81769 | 3.60384  | 0.00318847 | 0.999875 | 60.9924 | -3.00181 |
| 10404341 | Prl4a1        | prolactin family 4, subfamily a, member 1                           | -0.367777 | 5.95991 | -3.59652 | 0.00323349 | 0.999875 | 61.9922 | -3.00631 |
| 10598093 | Gm9904        | predicted gene 9904                                                 | 0.478939  | 8.39099 | 3.57973  | 0.00333928 | 0.999875 | 62.9921 | -3.01665 |
| 10400189 | Gm7172        | predicted gene 7172                                                 | -0.537149 | 7.55191 | -3.57951 | 0.00334068 | 0.999875 | 63.992  | -3.01679 |
| 10584514 | Olfr972       | olfactory receptor 972                                              | 0.410481  | 4.8403  | 3.57667  | 0.00335895 | 0.999875 | 64.9919 | -3.01854 |
| 10418812 | 1700024G13Rik | RIKEN cDNA 1700024G13 gene                                          | 0.381632  | 6.73251 | 3.57226  | 0.00338751 | 0.999875 | 65.9917 | -3.02127 |
| 10389717 | NA            | NA                                                                  | 0.624664  | 6.04159 | 3.56055  | 0.00346443 | 0.999875 | 66.9916 | -3.0285  |
| 10400458 | NA            | NA                                                                  | 0.425655  | 5.40039 | 3.55482  | 0.00350275 | 0.999875 | 67.9915 | -3.03206 |
| 10344723 | Rrs1          | RRS1 ribosome biogenesis regulator homolog ( <i>S. cerevisiae</i> ) | 0.572215  | 7.09321 | 3.5234   | 0.0037205  | 0.999875 | 68.9914 | -3.05158 |
| 10358513 | Hmcn1         | hemimentin 1                                                        | -0.411107 | 7.70316 | -3.50225 | 0.00387477 | 0.999875 | 69.9912 | -3.06479 |
| 10497319 | NA            | NA                                                                  | 0.667611  | 4.42793 | 3.49955  | 0.00389492 | 0.999875 | 70.9911 | -3.06648 |
| 10438666 | NA            | NA                                                                  | -0.387375 | 7.78079 | -3.49847 | 0.00390301 | 0.999875 | 71.991  | -3.06715 |
| 10439287 | NA            | NA                                                                  | 0.390671  | 4.47559 | 3.49666  | 0.00391664 | 0.999875 | 72.9909 | -3.06829 |

|                 |               |                                                              |                  |                |                 |                   |                 |                |                 |
|-----------------|---------------|--------------------------------------------------------------|------------------|----------------|-----------------|-------------------|-----------------|----------------|-----------------|
| 10548385        | Olr1          | oxidized low density lipoprotein (lectin-like) receptor 1    | 0.654925         | 7.26112        | 3.48683         | 0.00399132        | 0.999875        | 73.9907        | -3.07445        |
| 10561513        | Mrps12        | mitochondrial ribosomal protein S12                          | 0.556881         | 7.40551        | 3.47425         | 0.00408901        | 0.999875        | 74.9906        | -3.08235        |
| 10529091        | NA            | NA                                                           | 0.952884         | 5.52358        | 3.47399         | 0.00409106        | 0.999875        | 75.9905        | -3.08251        |
| 10555889        | Olfr663       | olfactory receptor 663                                       | 0.352781         | 5.40881        | 3.45988         | 0.00420358        | 0.999875        | 76.9904        | -3.0914         |
| 10431585        | Chkb          | choline kinase beta                                          | -0.387953        | 7.30779        | -3.45498        | 0.00424335        | 0.999875        | 77.9902        | -3.09449        |
| 10379511        | Ccl2          | chemokine (C-C motif) ligand 2                               | 0.455138         | 8.12556        | 3.45477         | 0.0042451         | 0.999875        | 78.9901        | -3.09462        |
| 10577424        | NA            | NA                                                           | 0.420237         | 5.35927        | 3.4419          | 0.00435146        | 0.999875        | 79.99          | -3.10275        |
| 10374553        | Tmem17        | transmembrane protein 17                                     | 0.395954         | 7.01328        | 3.43329         | 0.00442413        | 0.999875        | 80.9899        | -3.10819        |
| 10555177        | NA            | NA                                                           | 0.451431         | 5.33993        | 3.41536         | 0.00457943        | 0.999875        | 81.9897        | -3.11956        |
| 10597511        | Gm5921        | predicted gene 5921                                          | -0.865025        | 6.59008        | -3.40043        | 0.00471299        | 0.999875        | 82.9896        | -3.12906        |
| 10502240        | Npnt          | nephronectin                                                 | -0.42111         | 9.59286        | -3.40008        | 0.00471621        | 0.999875        | 83.9895        | -3.12929        |
| 10358583        | Hmcn1         | hemientin 1                                                  | -0.393875        | 10.7507        | -3.39833        | 0.00473211        | 0.999875        | 84.9894        | -3.1304         |
| 10538580        | V1rc7         | vomeronasal 1 receptor, C7                                   | 0.36692          | 3.79024        | 3.38174         | 0.00488567        | 0.999875        | 85.9892        | -3.14098        |
| 10440903        | 4932438H23Rik | RIKEN cDNA 4932438H23 gene                                   | 0.383643         | 6.65374        | 3.37918         | 0.00490987        | 0.999875        | 86.9891        | -3.14262        |
| 10493910        | Gm4858        | predicted gene 4858                                          | -0.624752        | 5.56506        | -3.37805        | 0.0049205         | 0.999875        | 87.989         | -3.14334        |
| 10438423        | Olfr165       | olfactory receptor 165                                       | 0.457679         | 5.99437        | 3.36955         | 0.00500177        | 0.999875        | 88.9889        | -3.14878        |
| 10435787        | NA            | NA                                                           | -0.5593          | 6.1923         | -3.36414        | 0.00505413        | 0.999875        | 89.9887        | -3.15224        |
| 10510265        | Nppa          | natriuretic peptide precursor type A                         | 0.497704         | 6.93221        | 3.36372         | 0.00505822        | 0.999875        | 90.9886        | -3.15251        |
| 10591614        | Dock6         | dedicator of cytokinesis 6                                   | -0.536256        | 7.62885        | -3.35193        | 0.00517439        | 0.999875        | 91.9885        | -3.16007        |
| 10366158        | NA            | NA                                                           | 0.412725         | 3.86174        | 3.34            | 0.00529476        | 0.999875        | 92.9884        | -3.16774        |
| 10518568        | Gm13208       | ribosomal protein SA pseudogene                              | -0.44359         | 5.44908        | -3.33906        | 0.00530429        | 0.999875        | 93.9882        | -3.16834        |
| 10607950        | NA            | NA                                                           | -0.381624        | 7.01033        | -3.33715        | 0.00532385        | 0.999875        | 94.9881        | -3.16957        |
| 10555877        | Olfr654       | olfactory receptor 654                                       | 0.375423         | 5.57746        | 3.33377         | 0.0053587         | 0.999875        | 95.988         | -3.17175        |
| 10536667        | Ptprz1        | protein tyrosine phosphatase, receptor type Z, polypeptide 1 | -0.376799        | 6.21012        | -3.33173        | 0.00537979        | 0.999875        | 96.9879        | -3.17306        |
| 10538567        | V1rc32        | vomeronasal 1 receptor, C32                                  | 0.370247         | 4.47396        | 3.329           | 0.00540819        | 0.999875        | 97.9877        | -3.17482        |
| 10549534        | NA            | NA                                                           | -0.406346        | 6.34481        | -3.32891        | 0.00540907        | 0.999875        | 98.9876        | -3.17487        |
| 10469816        | Il1rn         | interleukin 1 receptor antagonist                            | 0.538099         | 7.82725        | 3.32739         | 0.00542494        | 0.999875        | 99.9875        | -3.17585        |
| <b>10480459</b> | <b>Hnmt</b>   | <b>histamine N-methyltransferase</b>                         | <b>-0.371321</b> | <b>6.57713</b> | <b>-3.31384</b> | <b>0.00556847</b> | <b>0.999875</b> | <b>100.987</b> | <b>-3.18459</b> |
| 10600825        | Zc3h12b       | zinc finger CCCH-type containing 12B                         | -0.410157        | 6.27604        | -3.30672        | 0.00564545        | 0.999875        | 101.987        | -3.1892         |
| 10527959        | NA            | NA                                                           | -0.333045        | 7.19192        | -3.30231        | 0.00569365        | 0.999875        | 102.987        | -3.19205        |
| 10531049        | NA            | NA                                                           | 0.500304         | 5.49466        | 3.30193         | 0.00569785        | 0.999875        | 103.987        | -3.1923         |
| 10403013        | NA            | NA                                                           | 0.67982          | 5.39505        | 3.28882         | 0.00584364        | 0.999875        | 104.987        | -3.20079        |
| 10522285        | C330024D21Rik | RIKEN cDNA C330024D21 gene                                   | 0.485636         | 5.91653        | 3.28471         | 0.00589015        | 0.999875        | 105.987        | -3.20345        |
| 10539802        | Bmp10         | bone morphogenetic protein 10                                | 0.370971         | 5.39262        | 3.28309         | 0.0059085         | 0.999875        | 106.987        | -3.2045         |
| 10608509        | NA            | NA                                                           | 0.390444         | 7.0762         | 3.27794         | 0.00596749        | 0.999875        | 107.986        | -3.20785        |
| 10534493        | Ccl24         | chemokine (C-C motif) ligand 24                              | 0.620415         | 7.77179        | 3.27274         | 0.00602758        | 0.999875        | 108.986        | -3.21122        |
| 10379518        | Ccl7          | chemokine (C-C motif) ligand 7                               | 0.374461         | 7.82913        | 3.2712          | 0.00604552        | 0.999875        | 109.986        | -3.21222        |
| 10422699        | NA            | NA                                                           | -0.358721        | 7.19984        | -3.26964        | 0.00606375        | 0.999875        | 110.986        | -3.21324        |
| 10358660        | Hmcn1         | hemientin 1                                                  | -0.596176        | 7.73839        | -3.26784        | 0.00608491        | 0.999875        | 111.986        | -3.21441        |
| 10433190        | NA            | NA                                                           | 0.443171         | 4.9124         | 3.2678          | 0.00608534        | 0.999875        | 112.986        | -3.21444        |
| 10580733        | Bbs2          | Bardet-Biedl syndrome 2 (human)                              | -0.331932        | 6.87402        | -3.25296        | 0.00626197        | 0.999875        | 113.986        | -3.2241         |
| 10415606        | NA            | NA                                                           | -0.409998        | 5.20163        | -3.24161        | 0.00640058        | 0.999875        | 114.986        | -3.23151        |

|                 |               |                                                                                                 |                 |                |                |                   |                 |                |                 |
|-----------------|---------------|-------------------------------------------------------------------------------------------------|-----------------|----------------|----------------|-------------------|-----------------|----------------|-----------------|
| 10565355        | Vmn2r70       | vomeronasal 2, receptor 70                                                                      | 0.371747        | 5.27183        | 3.22899        | 0.00655819        | 0.999875        | 115.985        | -3.23975        |
| 10416897        | NA            | NA                                                                                              | -0.663033       | 3.57305        | -3.228         | 0.00657075        | 0.999875        | 116.985        | -3.2404         |
| 10578690        | Neil3         | nei like 3 (E. coli)                                                                            | -0.343716       | 6.88882        | -3.22049       | 0.00666658        | 0.999875        | 117.985        | -3.24532        |
| 10562576        | Plekhf1       | pleckstrin homology domain containing, family F (with FYVE domain) member 1                     | -0.412402       | 6.76742        | -3.21252       | 0.00676994        | 0.999875        | 118.985        | -3.25055        |
| 10591125        | Fat3          | FAT tumor suppressor homolog 3 (Drosophila)                                                     | -0.352537       | 7.36804        | -3.20624       | 0.00685238        | 0.999875        | 119.985        | -3.25466        |
| 10526085        | NA            | NA                                                                                              | 0.377441        | 5.91434        | 3.20481        | 0.00687132        | 0.999875        | 120.985        | -3.2556         |
| 10408900        | NA            | NA                                                                                              | 0.320878        | 6.47584        | 3.20466        | 0.00687325        | 0.999875        | 121.985        | -3.2557         |
| 10537062        | Mest          | mesoderm specific transcript                                                                    | -0.395382       | 7.98758        | -3.18876       | 0.00708727        | 0.999875        | 122.985        | -3.26615        |
| 10373073        | D10Ertd610e   | DNA segment, Chr 10, ERATO Doi 610, expressed                                                   | -0.345031       | 7.23193        | -3.18839       | 0.00709235        | 0.999875        | 123.984        | -3.26639        |
| 10497613        | Gm10258       | predicted gene 10258                                                                            | -0.362732       | 6.09921        | -3.17858       | 0.00722787        | 0.999875        | 124.984        | -3.27286        |
| 10596148        | Trf           | transferrin                                                                                     | -0.347465       | 9.83617        | -3.15539       | 0.00755854        | 0.999875        | 125.984        | -3.28817        |
| 10465366        | Zfp1          | zinc finger like protein 1                                                                      | -0.338945       | 6.58738        | -3.15273       | 0.00759734        | 0.999875        | 126.984        | -3.28992        |
| 10358599        | Hmcn1         | hemimentin 1                                                                                    | -0.423835       | 8.25608        | -3.14991       | 0.0076388         | 0.999875        | 127.984        | -3.29179        |
| 10439409        | BC031361      | cDNA sequence BC031361                                                                          | 0.354163        | 5.70328        | 3.14401        | 0.00772628        | 0.999875        | 128.984        | -3.2957         |
| 10446769        | NA            | NA                                                                                              | 0.38214         | 3.61465        | 3.13943        | 0.00779473        | 0.999875        | 129.984        | -3.29873        |
| 10356461        | Hjrup         | Holliday junction recognition protein                                                           | 0.416156        | 7.10286        | 3.12958        | 0.00794426        | 0.999875        | 130.984        | -3.30526        |
| 10410317        | Zfp459        | zinc finger protein 459                                                                         | -0.388587       | 6.37735        | -3.12916       | 0.00795066        | 0.999875        | 131.983        | -3.30553        |
| 10563911        | NA            | NA                                                                                              | 0.439647        | 3.32552        | 3.12837        | 0.00796286        | 0.999875        | 132.983        | -3.30606        |
| 10351959        | 1810030J14Rik | RIKEN cDNA 1810030J14 gene                                                                      | 0.40095         | 4.9933         | 3.12673        | 0.00798813        | 0.999875        | 133.983        | -3.30715        |
| 10565994        | Art2b         | ADP-ribosyltransferase 2b                                                                       | 0.4557          | 6.38943        | 3.12373        | 0.00803446        | 0.999875        | 134.983        | -3.30914        |
| 10531191        | Adamts3       | a disintegrin-like and metalloproteinase (reprolysins type) with thrombospondin type 1 motif, 3 | -0.335563       | 6.05808        | -3.12332       | 0.00804075        | 0.999875        | 135.983        | -3.30941        |
| 10513266        | Olfr267       | olfactory receptor 267                                                                          | 0.328484        | 6.49039        | 3.11311        | 0.0082007         | 0.999875        | 136.983        | -3.3162         |
| 10395953        | NA            | NA                                                                                              | 0.361745        | 6.56912        | 3.10745        | 0.00829063        | 0.999875        | 137.983        | -3.31996        |
| 10439289        | BC117090      | cDNA sequence BC117090                                                                          | 0.38988         | 5.4424         | 3.10662        | 0.00830391        | 0.999875        | 138.983        | -3.32051        |
| 10545569        | Reg3g         | regenerating islet-derived 3 gamma                                                              | 1.02843         | 8.00832        | 3.09267        | 0.00853043        | 0.999875        | 139.982        | -3.32981        |
| 10358658        | Hmcn1         | hemimentin 1                                                                                    | -0.559923       | 9.35044        | -3.0921        | 0.00853973        | 0.999875        | 140.982        | -3.33019        |
| 10582190        | Gins2         | GINS complex subunit 2 (Psf2 homolog)                                                           | -0.325205       | 7.71734        | -3.09208       | 0.00854014        | 0.999875        | 141.982        | -3.3302         |
| <b>10499899</b> | <b>Sprr1a</b> | <b>small proline-rich protein 1A</b>                                                            | <b>0.387723</b> | <b>8.05856</b> | <b>3.08292</b> | <b>0.00869217</b> | <b>0.999875</b> | <b>142.982</b> | <b>-3.33631</b> |
| 10452376        | Vmn2r120      | vomeronasal 2, receptor 120                                                                     | 0.328112        | 5.79508        | 3.06994        | 0.00891249        | 0.999875        | 143.982        | -3.34498        |
| 10397559        | Gm8655        | predicted gene 8655                                                                             | 0.482262        | 7.03908        | 3.06722        | 0.00895934        | 0.999875        | 144.982        | -3.3468         |
| 10583418        | Olfr857       | olfactory receptor 857                                                                          | -0.366155       | 4.71645        | -3.05014       | 0.00925926        | 0.999875        | 145.982        | -3.35824        |
| 10401665        | NA            | NA                                                                                              | 0.405765        | 5.49809        | 3.04679        | 0.00931927        | 0.999875        | 146.982        | -3.36048        |
| 10476880        | A530006G24Rik | RIKEN cDNA A530006G24 gene                                                                      | -0.378696       | 6.63898        | -3.04541       | 0.0093441         | 0.999875        | 147.981        | -3.36141        |
| 10484283        | Pde1a         | phosphodiesterase 1A, calmodulin-dependent                                                      | 0.322068        | 6.18459        | 3.03742        | 0.00948902        | 0.999875        | 148.981        | -3.36677        |
| 10380965        | Gsdma2        | gasdermin A2                                                                                    | 0.350401        | 5.12837        | 3.03169        | 0.00959443        | 0.999875        | 149.981        | -3.37062        |

|          |               |                                                               |           |         |          |            |          |         |          |
|----------|---------------|---------------------------------------------------------------|-----------|---------|----------|------------|----------|---------|----------|
| 10563407 | Kcnj14        | potassium inwardly-rectifying channel, subfamily J, member 14 | 0.314553  | 7.54943 | 3.03159  | 0.00959627 | 0.999875 | 150.981 | -3.37068 |
| 10346678 | Carf          | calcium response factor                                       | -0.398666 | 6.74575 | -3.0289  | 0.0096461  | 0.999875 | 151.981 | -3.37249 |
| 10346928 | NA            | NA                                                            | 0.334689  | 6.10137 | 3.02729  | 0.0096762  | 0.999875 | 152.981 | -3.37358 |
| 10499363 | Bglap1        | bone gamma carboxyglutamate protein 1                         | 0.356403  | 7.79753 | 3.02637  | 0.00969336 | 0.999875 | 153.981 | -3.37419 |
| 10345875 | NA            | NA                                                            | 0.520353  | 6.27269 | 3.02111  | 0.00979207 | 0.999875 | 154.981 | -3.37773 |
| 10384782 | Vrk2          | vaccinia related kinase 2                                     | 0.329852  | 6.38551 | 3.02088  | 0.00979636 | 0.999875 | 155.98  | -3.37788 |
| 10376950 | Pmp22         | peripheral myelin protein 22                                  | -0.59586  | 10.9042 | -3.01283 | 0.00994962 | 0.999875 | 156.98  | -3.3833  |
| 10491619 | 4932438A13Rik | RIKEN cDNA 4932438A13 gene                                    | -0.348723 | 8.03325 | -3.00908 | 0.0100217  | 0.999875 | 157.98  | -3.38583 |
| 10416850 | Scel          | sciellin                                                      | -0.389509 | 9.35264 | -3.00694 | 0.0100631  | 0.999875 | 158.98  | -3.38727 |
| 10572960 | LOC100039235  | hypothetical protein LOC100039235                             | -0.369073 | 7.06316 | -3.00583 | 0.0100846  | 0.999875 | 159.98  | -3.38801 |
| 10487588 | Il1a          | interleukin 1 alpha                                           | 0.554749  | 7.00552 | 3.00538  | 0.0100934  | 0.999875 | 160.98  | -3.38832 |
| 10452468 | E130009J12Rik | RIKEN cDNA E130009J12 gene                                    | 0.454738  | 7.12703 | 3.00385  | 0.0101233  | 0.999875 | 161.98  | -3.38935 |
| 10493905 | NA            | NA                                                            | 0.503051  | 4.48181 | 2.99972  | 0.0102041  | 0.999875 | 162.98  | -3.39214 |
| 10368050 | Ect2l         | epithelial cell transforming sequence 2 oncogene-like         | -0.337129 | 5.26621 | -2.99574 | 0.0102827  | 0.999875 | 163.979 | -3.39482 |
| 10565204 | Bnc1          | basonuclin 1                                                  | 0.310145  | 6.5935  | 2.99535  | 0.0102904  | 0.999875 | 164.979 | -3.39508 |
| 10601461 | Cyhc1         | cylicin, basic protein of sperm head cytoskeleton 1           | 0.306373  | 4.65978 | 2.9946   | 0.0103051  | 0.999875 | 165.979 | -3.39558 |
| 10491617 | 4932438A13Rik | RIKEN cDNA 4932438A13 gene                                    | -0.314021 | 8.87035 | -2.98891 | 0.0104187  | 0.999875 | 166.979 | -3.39942 |
| 10472944 | NA            | NA                                                            | 0.361055  | 4.93866 | 2.9881   | 0.0104349  | 0.999875 | 167.979 | -3.39997 |
| 10571749 | NA            | NA                                                            | 0.416771  | 5.92889 | 2.98551  | 0.0104871  | 0.999875 | 168.979 | -3.40172 |
| 10550217 | Crxos1        | Crx opposite strand transcript 1                              | 0.329887  | 5.40884 | 2.98187  | 0.010561   | 0.999875 | 169.979 | -3.40418 |
| 10420596 | Tnfrsf19      | tumor necrosis factor receptor superfamily, member 19         | -0.308318 | 7.15118 | -2.97675 | 0.0106656  | 0.999875 | 170.979 | -3.40764 |
| 10479973 | Gm10115       | predicted gene 10115                                          | -0.38636  | 9.2463  | -2.96832 | 0.0108401  | 0.999875 | 171.978 | -3.41334 |
| 10368173 | 4933406P04Rik | RIKEN cDNA 4933406P04 gene                                    | -0.313718 | 5.31447 | -2.96323 | 0.010947   | 0.999875 | 172.978 | -3.41679 |
| 10445153 | Olfr121       | olfactory receptor 121                                        | -0.369581 | 4.76333 | -2.96286 | 0.0109547  | 0.999875 | 173.978 | -3.41704 |
| 10482123 | Olfr351       | olfactory receptor 351                                        | 0.318459  | 5.77212 | 2.95705  | 0.0110779  | 0.999875 | 174.978 | -3.42097 |
| 10566620 | Olfr711       | olfactory receptor 711                                        | 0.394745  | 6.05021 | 2.95522  | 0.011117   | 0.999875 | 175.978 | -3.42221 |
| 10533085 | Pebp1         | phosphatidylethanolamine binding protein 1                    | -0.449266 | 7.14388 | -2.95497 | 0.0111223  | 0.999875 | 176.978 | -3.42238 |
| 10406614 | Mtx3          | metaxin 3                                                     | -0.309362 | 6.748   | -2.95238 | 0.011178   | 0.999875 | 177.978 | -3.42414 |
| 10412414 | 4833420G17Rik | RIKEN cDNA 4833420G17 gene                                    | -0.369693 | 7.02085 | -2.94639 | 0.0113075  | 0.999875 | 178.978 | -3.4282  |
| 10404898 | Gm1574        | predicted gene 1574                                           | 0.321952  | 6.9371  | 2.94542  | 0.0113287  | 0.999875 | 179.977 | -3.42886 |
| 10565990 | Art2a         | ADP-ribosyltransferase 2a                                     | 0.467023  | 7.18712 | 2.94518  | 0.0113339  | 0.999875 | 180.977 | -3.42902 |
| 10398859 | Adssl1        | adenylosuccinate synthetase like 1                            | 0.306841  | 7.12916 | 2.93927  | 0.0114635  | 0.999875 | 181.977 | -3.43303 |
| 10598976 | Timp1         | tissue inhibitor of metalloproteinase 1                       | 0.44508   | 7.30858 | 2.93123  | 0.0116424  | 0.999875 | 182.977 | -3.43849 |
| 10492983 | Fcrl5         | Fc receptor-like 5                                            | 0.322588  | 6.10231 | 2.92819  | 0.0117105  | 0.999875 | 183.977 | -3.44055 |
| 10444587 | NA            | NA                                                            | 0.324429  | 6.32399 | 2.92763  | 0.0117232  | 0.999875 | 184.977 | -3.44094 |
| 10454632 | Camk4         | calcium/calmodulin-dependent protein kinase IV                | 0.298474  | 6.20393 | 2.92527  | 0.0117766  | 0.999875 | 185.977 | -3.44254 |

|          |               |                                                                    |           |         |          |           |          |         |          |
|----------|---------------|--------------------------------------------------------------------|-----------|---------|----------|-----------|----------|---------|----------|
| 10402347 | Ifi27l2a      | interferon, alpha-inducible protein 27 like 2A                     | 0.325175  | 7.22826 | 2.92457  | 0.0117924 | 0.999875 | 186.977 | -3.44302 |
| 10576386 | Rhou          | ras homolog gene family, member U                                  | 0.347981  | 7.5999  | 2.92172  | 0.0118574 | 0.999875 | 187.976 | -3.44496 |
| 10406548 | NA            | NA                                                                 | 0.437567  | 5.66042 | 2.91813  | 0.0119394 | 0.999875 | 188.976 | -3.4474  |
| 10458888 | NA            | NA                                                                 | -0.47547  | 3.82931 | -2.91717 | 0.0119616 | 0.999875 | 189.976 | -3.44805 |
| 10499089 | NA            | NA                                                                 | 0.402351  | 5.56268 | 2.91563  | 0.0119971 | 0.999875 | 190.976 | -3.4491  |
| 10345077 | Khdc1a        | KH domain containing 1A                                            | -0.410607 | 4.88996 | -2.91552 | 0.0119996 | 0.999875 | 191.976 | -3.44918 |
| 10519988 | AI847670      | expressed sequence AI847670                                        | -0.323897 | 7.17885 | -2.90892 | 0.0121529 | 0.999875 | 192.976 | -3.45367 |
| 10480288 | Neb1          | nebullette                                                         | -0.321632 | 8.70284 | -2.8989  | 0.0123891 | 0.999875 | 193.976 | -3.46049 |
| 10586174 | NA            | NA                                                                 | -0.335214 | 5.28198 | -2.89681 | 0.0124392 | 0.999875 | 194.976 | -3.46192 |
| 10597960 | Slc6a20a      | solute carrier family 6 (neurotransmitter transporter), member 20A | -0.296206 | 7.59733 | -2.89373 | 0.012513  | 0.999875 | 195.975 | -3.46402 |
| 10571198 | Gm1698        | predicted gene 1698                                                | 0.326724  | 5.51721 | 2.89246  | 0.0125436 | 0.999875 | 196.975 | -3.46488 |
| 10354773 | Hsfy2         | heat shock transcription factor, Y linked 2                        | 0.325707  | 4.73543 | 2.89022  | 0.0125977 | 0.999875 | 197.975 | -3.46641 |
| 10386703 | Gm12271       | predicted gene 12271                                               | 0.374317  | 5.65944 | 2.88806  | 0.0126501 | 0.999875 | 198.975 | -3.46788 |
| 10538269 | NA            | NA                                                                 | -0.302144 | 5.32311 | -2.88464 | 0.0127335 | 0.999875 | 199.975 | -3.47022 |
| 10582839 | Gm9909        | predicted gene 9909                                                | -0.349646 | 7.55996 | -2.88379 | 0.0127543 | 0.999875 | 200.975 | -3.4708  |
| 10403579 | Pr12c5        | prolactin family 2, subfamily c, member 5                          | 0.405004  | 5.57833 | 2.88314  | 0.0127703 | 0.999875 | 201.975 | -3.47124 |
| 10407803 | Gpr137b       | G protein-coupled receptor 137B                                    | -0.408478 | 7.19423 | -2.88023 | 0.0128418 | 0.999875 | 202.975 | -3.47323 |
| 10549055 | NA            | NA                                                                 | 0.431987  | 5.08095 | 2.87777  | 0.0129028 | 0.999875 | 203.974 | -3.47491 |
| 10582458 | Ankrd11       | ankyrin repeat domain 11                                           | -0.294785 | 7.04711 | -2.87609 | 0.0129444 | 0.999875 | 204.974 | -3.47605 |
| 10403750 | 2810021B07Rik | RIKEN cDNA 2810021B07 gene                                         | -0.353121 | 8.58741 | -2.87292 | 0.0130236 | 0.999875 | 205.974 | -3.47822 |
| 10583291 | 2200002K05Rik | RIKEN cDNA 2200002K05 gene                                         | 0.359157  | 6.31219 | 2.8724   | 0.0130365 | 0.999875 | 206.974 | -3.47857 |
| 10397507 | Gstz1         | glutathione transferase zeta 1 (maleylacetoacetate isomerase)      | -0.332998 | 6.46998 | -2.87232 | 0.0130387 | 0.999875 | 207.974 | -3.47863 |
| 10421293 | Ppp3cc        | protein phosphatase 3, catalytic subunit, gamma isoform            | -0.295463 | 8.62844 | -2.869   | 0.0131219 | 0.999875 | 208.974 | -3.4809  |
| 10451167 | Tmem63b       | transmembrane protein 63b                                          | -0.344867 | 8.28697 | -2.85807 | 0.0134004 | 0.999875 | 209.974 | -3.48837 |
| 10581917 | 4932417116Rik | RIKEN cDNA 4932417116 gene                                         | -0.288378 | 6.54277 | -2.8548  | 0.0134848 | 0.999875 | 210.974 | -3.49061 |
| 10495820 | Fabp2         | fatty acid binding protein 2, intestinal                           | 0.337377  | 6.06809 | 2.8531   | 0.013529  | 0.999875 | 211.973 | -3.49178 |
| 10507775 | NA            | NA                                                                 | 0.375778  | 4.46735 | 2.84991  | 0.0136122 | 0.999875 | 212.973 | -3.49396 |
| 10469579 | NA            | NA                                                                 | 0.323314  | 5.80849 | 2.84683  | 0.0136928 | 0.999875 | 213.973 | -3.49607 |
| 10606835 | Bex2          | brain expressed X-linked 2                                         | 0.391617  | 5.89828 | 2.84604  | 0.0137137 | 0.999875 | 214.973 | -3.49661 |
| 10572083 | NA            | NA                                                                 | 0.372332  | 6.16685 | 2.84489  | 0.013744  | 0.999875 | 215.973 | -3.4974  |
| 10502791 | Ifi44         | interferon-induced protein 44                                      | 0.461923  | 8.02579 | 2.84465  | 0.0137503 | 0.999875 | 216.973 | -3.49756 |
| 10358635 | Hmcn1         | hemimentin 1                                                       | -0.338885 | 7.66413 | -2.84239 | 0.01381   | 0.999875 | 217.973 | -3.49911 |
| 10350504 | Gm5263        | predicted gene 5263                                                | -0.323132 | 8.04567 | -2.83959 | 0.0138846 | 0.999875 | 218.973 | -3.50103 |
| 10362442 | Trdn          | triadin                                                            | 0.601865  | 6.71536 | 2.83694  | 0.0139552 | 0.999875 | 219.972 | -3.50284 |
| 10439974 | Gm8900        | predicted gene 8900                                                | 0.361742  | 5.43854 | 2.8348   | 0.0140127 | 0.999875 | 220.972 | -3.50431 |
| 10548779 | Pbp2          | phosphatidylethanolamine binding protein 2                         | 0.350254  | 6.23911 | 2.83263  | 0.0140711 | 0.999875 | 221.972 | -3.5058  |

|                 |               |                                                                                       |                 |                |                |                  |                 |                |                 |
|-----------------|---------------|---------------------------------------------------------------------------------------|-----------------|----------------|----------------|------------------|-----------------|----------------|-----------------|
| 10470182        | Bmyc          | brain expressed myelocytomatosis oncogene                                             | 0.299731        | 7.34202        | 2.82578        | 0.0142573        | 0.999875        | 222.972        | -3.5105         |
| 10598598        | 1700054O13Rik | RIKEN cDNA 1700054O13 gene                                                            | 0.298106        | 7.21737        | 2.82097        | 0.0143897        | 0.999875        | 223.972        | -3.5138         |
| 10476950        | NA            | NA                                                                                    | 0.300716        | 5.90719        | 2.81923        | 0.0144377        | 0.999875        | 224.972        | -3.515          |
| 10358601        | Hmcn1         | hemimentin 1                                                                          | -0.351144       | 8.55008        | -2.81737       | 0.0144892        | 0.999875        | 225.972        | -3.51627        |
| 10376376        | 1810065E05Rik | RIKEN cDNA 1810065E05 gene                                                            | 0.392127        | 5.3718         | 2.80549        | 0.0148232        | 0.999875        | 226.972        | -3.52443        |
| 10415608        | lft88         | intraflagellar transport 88 homolog (Chlamydomonas)                                   | -0.296567       | 8.19303        | -2.80484       | 0.0148416        | 0.999875        | 227.971        | -3.52488        |
| 10543460        | 6332401O19Rik | RIKEN cDNA 6332401O19 gene                                                            | 0.291862        | 6.29064        | 2.80443        | 0.0148532        | 0.999875        | 228.971        | -3.52516        |
| 10379630        | Slfn2         | schlafen 2                                                                            | 0.363942        | 7.73285        | 2.801          | 0.0149513        | 0.999875        | 229.971        | -3.52752        |
| 10553027        | Fut1          | fucosyltransferase 1                                                                  | -0.289407       | 5.76655        | -2.79471       | 0.0151327        | 0.999875        | 230.971        | -3.53185        |
| 10501164        | Csf1          | colony stimulating factor 1 (macrophage)                                              | 0.283695        | 7.31302        | 2.79442        | 0.0151411        | 0.999875        | 231.971        | -3.53205        |
| 10497329        | NA            | NA                                                                                    | 0.399884        | 6.26731        | 2.79423        | 0.0151468        | 0.999875        | 232.971        | -3.53218        |
| 10462281        | Vldlr         | very low density lipoprotein receptor                                                 | -0.34193        | 8.12286        | -2.78737       | 0.0153473        | 0.999875        | 233.971        | -3.5369         |
| 10358577        | Hmcn1         | hemimentin 1                                                                          | -0.471074       | 10.1355        | -2.7863        | 0.0153785        | 0.999875        | 234.971        | -3.53763        |
| 10428081        | Hrsp12        | heat-responsive protein 12                                                            | -0.353649       | 7.3007         | -2.78526       | 0.0154094        | 0.999875        | 235.97         | -3.53835        |
| 10487597        | Il1b          | interleukin 1 beta                                                                    | 0.414658        | 8.83271        | 2.78121        | 0.0155294        | 0.999875        | 236.97         | -3.54114        |
| 10562603        | NA            | NA                                                                                    | 0.340421        | 3.92956        | 2.77603        | 0.0156843        | 0.999875        | 237.97         | -3.54471        |
| 10501895        | Myoz2         | myozenin 2                                                                            | 0.415454        | 7.33102        | 2.77556        | 0.0156983        | 0.999875        | 238.97         | -3.54503        |
| 10467258        | Myof          | myoferlin                                                                             | -0.351434       | 8.79882        | -2.77515       | 0.0157107        | 0.999875        | 239.97         | -3.54532        |
| 10542255        | Tas2r113      | taste receptor, type 2, member 113                                                    | 0.327596        | 6.58407        | 2.77396        | 0.0157465        | 0.999875        | 240.97         | -3.54613        |
| 10403834        | Sfrp4         | secreted frizzled-related protein 4                                                   | 0.332606        | 6.919          | 2.77081        | 0.0158419        | 0.999875        | 241.97         | -3.54831        |
| 10546533        | NA            | NA                                                                                    | 0.324446        | 7.42551        | 2.77071        | 0.0158448        | 0.999875        | 242.97         | -3.54837        |
| 10522494        | Gm6116        | predicted gene 6116                                                                   | 0.31099         | 5.38716        | 2.77067        | 0.0158461        | 0.999875        | 243.969        | -3.5484         |
| 10537676        | 1700034O15Rik | RIKEN cDNA 1700034O15 gene                                                            | 0.327383        | 5.96705        | 2.76886        | 0.015901         | 0.999875        | 244.969        | -3.54965        |
| 10546024        | Prokr1        | prokineticin receptor 1                                                               | -0.361833       | 6.4937         | -2.76732       | 0.015948         | 0.999875        | 245.969        | -3.55071        |
| 10549982        | V1rg2         | vomer nasal 1 receptor, G2                                                            | 0.288609        | 4.76806        | 2.76496        | 0.0160202        | 0.999875        | 246.969        | -3.55234        |
| 10527182        | E130309D02Rik | RIKEN cDNA E130309D02 gene                                                            | 0.400019        | 6.89584        | 2.75981        | 0.016179         | 0.999875        | 247.969        | -3.55589        |
| 10577449        | Atp7b         | ATPase, Cu <sup>++</sup> transporting, beta polypeptide                               | -0.302512       | 7.23344        | -2.75875       | 0.0162119        | 0.999875        | 248.969        | -3.55662        |
| 10404452        | Serp1nb9d     | serine (or cysteine) peptidase inhibitor, clade B, member 9d                          | 0.318939        | 4.84132        | 2.75624        | 0.01629          | 0.999875        | 249.969        | -3.55835        |
| 10412062        | Gm6233        | predicted gene 6233                                                                   | 0.328437        | 7.72628        | 2.75486        | 0.0163329        | 0.999875        | 250.969        | -3.5593         |
| 10490913        | Car3          | carbonic anhydrase 3                                                                  | 0.476554        | 8.02995        | 2.75427        | 0.0163516        | 0.999875        | 251.968        | -3.55971        |
| 10456754        | Gm10532       | predicted gene 10532                                                                  | -0.311764       | 6.32315        | -2.75201       | 0.0164224        | 0.999875        | 252.968        | -3.56127        |
| 10373000        | Xrcc6bp1      | XRCC6 binding protein 1                                                               | -0.283596       | 7.33493        | -2.74584       | 0.0166173        | 0.999875        | 253.968        | -3.56553        |
| <b>10403743</b> | <b>Inhba</b>  | <b>inhibin beta-A</b>                                                                 | <b>0.414779</b> | <b>7.51885</b> | <b>2.74362</b> | <b>0.0166881</b> | <b>0.999875</b> | <b>254.968</b> | <b>-3.56706</b> |
| 10442052        | Gm6712        | predicted gene 6712                                                                   | -0.392149       | 7.65153        | -2.74309       | 0.0167052        | 0.999875        | 255.968        | -3.56743        |
| 10545200        | LOC100046894  | similar to Igk-C protein                                                              | -0.42186        | 6.81669        | -2.73859       | 0.0168495        | 0.999875        | 256.968        | -3.57054        |
| 10465826        | Al462493      | expressed sequence Al462493                                                           | 0.289464        | 6.95922        | 2.73452        | 0.0169812        | 0.999875        | 257.968        | -3.57335        |
| 10407057        | Erc8          | excision repair cross-complementing rodent repair deficiency, complementation group 8 | -0.287457       | 6.5057         | -2.73209       | 0.0170604        | 0.999875        | 258.968        | -3.57503        |

|          |               |                                                         |           |         |          |           |          |         |          |
|----------|---------------|---------------------------------------------------------|-----------|---------|----------|-----------|----------|---------|----------|
| 10580635 | Ces3          | carboxylesterase 3                                      | -0.377248 | 8.93402 | -2.73207 | 0.0170608 | 0.999875 | 259.967 | -3.57504 |
| 10450369 | Hspa1a        | heat shock protein 1A                                   | 0.520311  | 8.3405  | 2.73101  | 0.0170955 | 0.999875 | 260.967 | -3.57577 |
| 10488372 | Gm14115       | predicted gene 14115                                    | 0.325022  | 6.84684 | 2.72608  | 0.0172573 | 0.999875 | 261.967 | -3.57918 |
| 10577067 | NA            | NA                                                      | 0.339788  | 5.77821 | 2.72015  | 0.0174543 | 0.999875 | 262.967 | -3.58329 |
| 10542335 | Gprc5a        | G protein-coupled receptor, family C, group 5, member A | -0.308768 | 7.8282  | -2.71723 | 0.0175518 | 0.999875 | 263.967 | -3.5853  |
| 10473630 | Olfr1260      | olfactory receptor 1260                                 | 0.290637  | 5.86882 | 2.71025  | 0.0177877 | 0.999875 | 264.967 | -3.59014 |
| 10463476 | Kazald1       | Kazal-type serine peptidase inhibitor domain 1          | -0.300456 | 5.84126 | -2.70935 | 0.0178183 | 0.999875 | 265.967 | -3.59076 |
| 10451670 | Bzrpl1        | benzodiazapine receptor, peripheral-like 1              | 0.293589  | 6.17736 | 2.70879  | 0.0178371 | 0.999875 | 266.967 | -3.59114 |
| 10381561 | Asb16         | ankyrin repeat and SOCS box-containing 16               | 0.280043  | 6.4149  | 2.70722  | 0.0178907 | 0.999875 | 267.966 | -3.59223 |
| 10531495 | Gm5109        | predicted gene 5109                                     | 0.372702  | 6.34703 | 2.70595  | 0.0179344 | 0.999875 | 268.966 | -3.59311 |
| 10550494 | NA            | NA                                                      | 0.305491  | 5.08263 | 2.70383  | 0.0180069 | 0.999875 | 269.966 | -3.59458 |
| 10481962 | Hc            | hemolytic complement                                    | -0.325999 | 9.80946 | -2.70086 | 0.0181094 | 0.999875 | 270.966 | -3.59663 |
| 10517703 | LOC626000     | similar to Cyclin D3                                    | -0.396468 | 6.50434 | -2.70026 | 0.0181302 | 0.999875 | 271.966 | -3.59705 |
| 10438478 | Abcc5         | ATP-binding cassette, sub-family C (CFTR/MRP), member 5 | -0.33107  | 7.61171 | -2.69969 | 0.01815   | 0.999875 | 272.966 | -3.59745 |
| 10545886 | 1700019G17Rik | RIKEN cDNA 1700019G17 gene                              | -0.319109 | 6.3826  | -2.69834 | 0.0181969 | 0.999875 | 273.966 | -3.59838 |
| 10504650 | NA            | NA                                                      | 0.293348  | 6.84153 | 2.69684  | 0.018249  | 0.999875 | 274.966 | -3.59942 |
| 10401997 | Ptpn21        | protein tyrosine phosphatase, non-receptor type 21      | -0.296022 | 7.15851 | -2.69369 | 0.018359  | 0.999875 | 275.965 | -3.6016  |
| 10415952 | NA            | NA                                                      | -0.46903  | 7.20679 | -2.69274 | 0.0183923 | 0.999875 | 276.965 | -3.60226 |
| 10368875 | Armc2         | armadillo repeat containing 2                           | 0.301207  | 6.51205 | 2.6925   | 0.0184007 | 0.999875 | 277.965 | -3.60242 |
| 10505356 | Zfp618        | zinc fingerprotein 618                                  | 0.281142  | 7.66326 | 2.68264  | 0.0187504 | 0.999875 | 278.965 | -3.60926 |
| 10436412 | Olfr195       | olfactory receptor 195                                  | 0.313299  | 4.72088 | 2.68153  | 0.0187903 | 0.999875 | 279.965 | -3.61003 |
| 10598833 | Chst7         | carbohydrate (N-acetylglucosamino) sulfotransferase 7   | 0.29577   | 6.37442 | 2.67952  | 0.0188622 | 0.999875 | 280.965 | -3.61142 |
| 10433197 | Olfr161       | olfactory receptor 161                                  | -0.437757 | 6.19309 | -2.67801 | 0.018917  | 0.999875 | 281.965 | -3.61248 |
| 10359908 | Rgs4          | regulator of G-protein signaling 4                      | 0.331341  | 7.83786 | 2.67526  | 0.0190163 | 0.999875 | 282.965 | -3.61438 |
| 10418982 | 4930596D02Rik | RIKEN cDNA 4930596D02 gene                              | 0.311498  | 6.80703 | 2.67503  | 0.0190245 | 0.999875 | 283.964 | -3.61454 |
| 10499945 | Lce1l         | late cornified envelope 1L                              | 0.281607  | 6.19674 | 2.67117  | 0.0191651 | 0.999875 | 284.964 | -3.61722 |
| 10606060 | Gm4779        | predicted gene 4779                                     | 0.305371  | 6.61847 | 2.67067  | 0.0191835 | 0.999875 | 285.964 | -3.61756 |
| 10539983 | BC048671      | cDNA sequence BC048671                                  | 0.276806  | 6.35383 | 2.66893  | 0.0192471 | 0.999875 | 286.964 | -3.61877 |
| 10595094 | 2310046A06Rik | RIKEN cDNA 2310046A06 gene                              | 0.304034  | 6.65088 | 2.66608  | 0.0193521 | 0.999875 | 287.964 | -3.62075 |
| 10598071 | NA            | NA                                                      | 0.425106  | 4.09125 | 2.66285  | 0.0194716 | 0.999875 | 288.964 | -3.62299 |
| 10430132 | Zfp647        | zinc finger protein 647                                 | -0.289917 | 6.55986 | -2.66164 | 0.0195165 | 0.999875 | 289.964 | -3.62383 |
| 10592404 | Olfr948       | olfactory receptor 948                                  | 0.404057  | 3.99398 | 2.66103  | 0.0195394 | 0.999875 | 290.964 | -3.62425 |
| 10566155 | NA            | NA                                                      | 0.301035  | 7.17142 | 2.65827  | 0.0196424 | 0.999875 | 291.963 | -3.62617 |
| 10450874 | Olfr101       | olfactory receptor 101                                  | -0.28638  | 5.94262 | -2.6569  | 0.0196938 | 0.999875 | 292.963 | -3.62712 |
| 10375083 | Stk10         | serine/threonine kinase 10                              | -0.275755 | 7.06364 | -2.65337 | 0.0198267 | 0.999875 | 293.963 | -3.62957 |
| 10361356 | NA            | NA                                                      | 0.532314  | 6.63481 | 2.65145  | 0.0198993 | 0.999875 | 294.963 | -3.63091 |



|          |       |                                                                      |           |         |          |           |          |         |          |
|----------|-------|----------------------------------------------------------------------|-----------|---------|----------|-----------|----------|---------|----------|
| 10406941 | Sgtb  | small glutamine-rich tetratricopeptide repeat (TPR)-containing, beta | -0.307648 | 6.8482  | -2.65123 | 0.0199076 | 0.999875 | 295.963 | -3.63106 |
| 10359582 | Fmo2  | flavin containing monooxygenase 2                                    | -0.424406 | 10.0489 | -2.65035 | 0.019941  | 0.999875 | 296.963 | -3.63167 |
| 10467136 | Ch25h | cholesterol 25-hydroxylase                                           | 0.349615  | 7.63292 | 2.65024  | 0.0199453 | 0.999875 | 297.963 | -3.63175 |

**DatasetS 3B: Differential expression between NIH and congenic *Tgfbm2/3* mice after saline exposure**

| Probe ID | GeneName | Gene Description                                    | logFC     | AveExpr | t        | P.Value     | adj.P.Val | NumExpectedFalse Discoveries | B        |
|----------|----------|-----------------------------------------------------|-----------|---------|----------|-------------|-----------|------------------------------|----------|
| 10479975 | NA       | NA                                                  | 1.394     | 7.92893 | 8.83686  | 7.18E-07    | 0.0184214 | 0.0184214                    | -1.53495 |
| 10591123 | Fat3     | FAT tumor suppressor homolog 3 (Drosophila)         | -0.688868 | 7.44678 | -6.25044 | 2.91E-05    | 0.239986  | 0.479972                     | -2.05307 |
| 10489909 | Ube2v1   | ubiquitin-conjugating enzyme E2 variant 1           | 0.622252  | 6.15296 | 6.21651  | 3.08E-05    | 0.239986  | 0.719959                     | -2.0626  |
| 10436095 | Retnla   | resistin like alpha                                 | 0.796869  | 10.5529 | 6.0956   | 3.74E-05    | 0.239986  | 0.959945                     | -2.09734 |
| 10470320 | NA       | NA                                                  | 0.731817  | 6.8718  | 5.73188  | 6.81E-05    | 0.349344  | 1.74672                      | -2.20922 |
| 10366158 | NA       | NA                                                  | 0.680434  | 3.86174 | 5.50644  | 9.95E-05    | 0.425819  | 2.55491                      | -2.28448 |
| 10597918 | NA       | NA                                                  | 0.513475  | 7.77284 | 4.95892  | 0.000258087 | 0.93598   | 6.55186                      | -2.48798 |
| 10493831 | S100a8   | S100 calcium binding protein A8 (calgranulin A)     | 0.714693  | 8.10711 | 4.80837  | 0.000337755 | 0.93598   | 7.48784                      | -2.54943 |
| 10478523 | NA       | NA                                                  | 0.679547  | 7.03248 | 4.76197  | 0.000367172 | 0.93598   | 8.42382                      | -2.56887 |
| 10544638 | Tra2a    | transformer 2 alpha homolog (Drosophila)            | 0.59984   | 8.57119 | 4.75373  | 0.000372666 | 0.93598   | 9.3598                       | -2.57234 |
| 10490299 | NA       | NA                                                  | 0.512326  | 3.59002 | 4.65184  | 0.000448138 | 0.93598   | 10.2958                      | -2.61596 |
| 10545239 | NA       | NA                                                  | -0.531164 | 6.26493 | -4.62023 | 0.000474651 | 0.93598   | 11.2318                      | -2.62973 |
| 10356461 | Hjurp    | Holliday junction recognition protein               | 0.613534  | 7.10286 | 4.6139   | 0.00048016  | 0.93598   | 12.1677                      | -2.63251 |
| 10559728 | NA       | NA                                                  | 0.545412  | 4.68028 | 4.58028  | 0.000510508 | 0.93598   | 13.1037                      | -2.6473  |
| 10351043 | NA       | NA                                                  | 0.470789  | 8.64592 | 4.31395  | 0.000833529 | 0.99974   | 14.9961                      | -2.76906 |
| 10511252 | Ube2j2   | ubiquitin-conjugating enzyme E2, J2 homolog (yeast) | 0.513371  | 6.59156 | 4.30381  | 0.000849357 | 0.99974   | 15.9958                      | -2.77386 |
| 10591118 | Fat3     | FAT tumor suppressor homolog 3 (Drosophila)         | -0.610416 | 9.21341 | -4.27149 | 0.00090196  | 0.99974   | 16.9956                      | -2.78923 |
| 10497077 | NA       | NA                                                  | 0.532217  | 4.22855 | 4.21566  | 0.00100085  | 0.99974   | 17.9953                      | -2.81608 |
| 10365492 | Gm5174   | predicted gene 5174                                 | -0.507828 | 6.4302  | -4.21439 | 0.00100323  | 0.99974   | 18.9951                      | -2.81669 |
| 10416705 | Gm9264   | predicted gene 9264                                 | 0.506653  | 7.3878  | 4.20053  | 0.00102953  | 0.99974   | 19.9948                      | -2.82341 |
| 10499861 | S100a9   | S100 calcium binding protein A9 (calgranulin B)     | 0.691118  | 9.23069 | 4.15005  | 0.00113147  | 0.99974   | 20.9945                      | -2.84808 |
| 10593191 | NA       | NA                                                  | 0.569935  | 4.985   | 4.14025  | 0.00115243  | 0.99974   | 21.9943                      | -2.8529  |
| 10546944 | Tmem111  | transmembrane protein 111                           | -0.487306 | 9.97717 | -3.98137 | 0.001554    | 0.99974   | 22.994                       | -2.93268 |
| 10427667 | NA       | NA                                                  | -0.536256 | 7.34688 | -3.97962 | 0.00155913  | 0.99974   | 23.9938                      | -2.93357 |
| 10346069 | Gm8304   | predicted gene 8304                                 | 0.458005  | 5.48191 | 3.9663   | 0.00159889  | 0.99974   | 24.9935                      | -2.9404  |

|          |          |                                                                    |           |         |          |            |         |         |          |
|----------|----------|--------------------------------------------------------------------|-----------|---------|----------|------------|---------|---------|----------|
| 10550494 | NA       | NA                                                                 | 0.441799  | 5.08263 | 3.91027  | 0.00177775 | 0.99974 | 25.9932 | -2.96932 |
| 10585706 | Cox5a    | cytochrome c oxidase, subunit Va                                   | 0.468905  | 8.89803 | 3.89753  | 0.0018212  | 0.99974 | 26.993  | -2.97595 |
| 10500524 | NA       | NA                                                                 | 0.506897  | 5.6791  | 3.85252  | 0.00198363 | 0.99974 | 27.9927 | -2.99952 |
| 10456968 | Gm6133   | predicted gene 6133                                                | 0.672685  | 4.42997 | 3.80545  | 0.00216937 | 0.99974 | 28.9925 | -3.02442 |
| 10533858 | Eif2b1   | eukaryotic translation initiation factor 2B, subunit 1 (alpha)     | -0.412219 | 6.97704 | -3.79897 | 0.00219628 | 0.99974 | 29.9922 | -3.02786 |
| 10443463 | Cdkn1a   | cyclin-dependent kinase inhibitor 1A (P21)                         | -0.418676 | 8.00386 | -3.79766 | 0.00220178 | 0.99974 | 30.9919 | -3.02856 |
| 10578320 | Gm8423   | predicted gene 8423                                                | 0.496486  | 6.93168 | 3.7963   | 0.00220747 | 0.99974 | 31.9917 | -3.02928 |
| 10491913 | NA       | NA                                                                 | -0.549709 | 4.46789 | -3.76239 | 0.00235479 | 0.99974 | 32.9914 | -3.04741 |
| 10545255 | Rpia     | ribose 5-phosphate isomerase A                                     | 0.409998  | 6.94913 | 3.76066  | 0.00236258 | 0.99974 | 33.9912 | -3.04834 |
| 10585986 | Myo9a    | myosin IXa                                                         | -0.609314 | 8.47898 | -3.75898 | 0.00237018 | 0.99974 | 34.9909 | -3.04924 |
| 10484704 | Olfr1157 | olfactory receptor 1157                                            | 0.418631  | 5.5094  | 3.73033  | 0.00250333 | 0.99974 | 35.9906 | -3.06467 |
| 10400124 | Gm7239   | predicted gene 7239                                                | 0.410634  | 7.27438 | 3.71337  | 0.00258569 | 0.99974 | 36.9904 | -3.07385 |
| 10541895 | Tnfrsf1a | tumor necrosis factor receptor superfamily, member 1a              | 0.380194  | 7.4899  | 3.70756  | 0.00261456 | 0.99974 | 37.9901 | -3.077   |
| 10450694 | H2-T22   | histocompatibility 2, T region locus 22                            | 0.407411  | 6.21232 | 3.67291  | 0.00279355 | 0.99974 | 38.9899 | -3.09587 |
| 10445796 | AI314976 | expressed sequence AI314976                                        | 0.384334  | 6.95405 | 3.6502   | 0.0029176  | 0.99974 | 39.9896 | -3.10831 |
| 10508721 | Snora44  | small nucleolar RNA, H/ACA box 44                                  | 0.39248   | 7.54501 | 3.63914  | 0.00297999 | 0.99974 | 40.9893 | -3.11438 |
| 10552090 | Abpe     | androgen binding protein epsilon                                   | 0.433917  | 5.05221 | 3.63805  | 0.00298626 | 0.99974 | 41.9891 | -3.11499 |
| 10350341 | NA       | NA                                                                 | 0.452224  | 6.10585 | 3.62329  | 0.00307182 | 0.99974 | 42.9888 | -3.12312 |
| 10591125 | Fat3     | FAT tumor suppressor homolog 3 (Drosophila)                        | -0.396577 | 7.36804 | -3.60677 | 0.0031706  | 0.99974 | 43.9886 | -3.13225 |
| 10404783 | Edn1     | endothelin 1                                                       | -0.3916   | 7.74929 | -3.59808 | 0.00322386 | 0.99974 | 44.9883 | -3.13707 |
| 10503172 | Chd7     | chromodomain helicase DNA binding protein 7                        | 0.645144  | 6.97362 | 3.57197  | 0.00338937 | 0.99974 | 45.988  | -3.15159 |
| 10474541 | Nop10    | NOP10 ribonucleoprotein homolog (yeast)                            | 0.422793  | 8.44521 | 3.56776  | 0.00341686 | 0.99974 | 46.9878 | -3.15394 |
| 10428837 | NA       | NA                                                                 | 0.546331  | 6.70102 | 3.56711  | 0.00342109 | 0.99974 | 47.9875 | -3.1543  |
| 10400508 | Gm4805   | ribosomal protein L26 pseudogene                                   | 0.402567  | 5.60751 | 3.56666  | 0.00342406 | 0.99974 | 48.9873 | -3.15456 |
| 10540296 | NA       | NA                                                                 | -0.503119 | 7.72644 | -3.55249 | 0.0035184  | 0.99974 | 49.987  | -3.16247 |
| 10376230 | G3bp1    | Ras-GTPase-activating protein SH3-domain binding protein 1         | 0.365858  | 7.37985 | 3.5457   | 0.0035646  | 0.99974 | 50.9868 | -3.16628 |
| 10536324 | Asb4     | ankyrin repeat and SOCS box-containing 4                           | 0.374892  | 5.70842 | 3.53003  | 0.00367343 | 0.99974 | 51.9865 | -3.17507 |
| 10389732 | Gm15698  | transcription elongation factor B (SIII), polypeptide 2 pseudogene | 0.425684  | 6.74537 | 3.52498  | 0.00370922 | 0.99974 | 52.9862 | -3.17791 |
| 10472398 | Scn2a1   | sodium channel, voltage-gated, type II, alpha 1                    | -0.386062 | 6.51037 | -3.51337 | 0.00379287 | 0.99974 | 53.986  | -3.18445 |
| 10516211 | Ndufs5   | NADH dehydrogenase (ubiquinone) Fe-S protein 5                     | -0.395583 | 7.24281 | -3.51108 | 0.00380959 | 0.99974 | 54.9857 | -3.18574 |
| 10584315 | NA       | NA                                                                 | -0.585202 | 6.48167 | -3.50267 | 0.00387162 | 0.99974 | 55.9855 | -3.19049 |
| 10502785 | Gm10287  | predicted gene 10287                                               | -0.452025 | 6.5328  | -3.50081 | 0.00388551 | 0.99974 | 56.9852 | -3.19154 |
| 10546417 | Trh      | thyrotropin releasing hormone                                      | 0.44649   | 6.5496  | 3.49962  | 0.00389437 | 0.99974 | 57.9849 | -3.19221 |

|          |               |                                                                         |           |         |          |            |         |         |          |
|----------|---------------|-------------------------------------------------------------------------|-----------|---------|----------|------------|---------|---------|----------|
| 10514830 | Ttc4          | tetratricopeptide repeat domain 4                                       | 0.387691  | 7.0289  | 3.49524  | 0.00392731 | 0.99974 | 58.9847 | -3.19469 |
| 10591129 | Fat3          | FAT tumor suppressor homolog 3 (Drosophila)                             | -0.467073 | 8.32561 | -3.49443 | 0.00393346 | 0.99974 | 59.9844 | -3.19515 |
| 10434698 | Fetub         | fetuin beta                                                             | 0.392831  | 6.52341 | 3.48788  | 0.00398325 | 0.99974 | 60.9842 | -3.19886 |
| 10516658 | Ccdc28b       | coiled coil domain containing 28B                                       | 0.394252  | 7.80585 | 3.47691  | 0.00406813 | 0.99974 | 61.9839 | -3.20508 |
| 10523672 | NA            | NA                                                                      | -0.398128 | 5.94602 | -3.47381 | 0.00409248 | 0.99974 | 62.9836 | -3.20685 |
| 10515090 | Cdkn2c        | cyclin-dependent kinase inhibitor 2C (p18, inhibits CDK4)               | 0.365237  | 7.27382 | 3.46508  | 0.00416175 | 0.99974 | 63.9834 | -3.21181 |
| 10542241 | Tas2r120      | taste receptor, type 2, member 120                                      | 0.445924  | 5.29695 | 3.46484  | 0.00416362 | 0.99974 | 64.9831 | -3.21194 |
| 10550181 | NA            | NA                                                                      | 0.717979  | 5.7491  | 3.46288  | 0.0041794  | 0.99974 | 65.9829 | -3.21306 |
| 10347158 | NA            | NA                                                                      | -0.382758 | 5.48482 | -3.46287 | 0.00417948 | 0.99974 | 66.9826 | -3.21307 |
| 10470318 | NA            | NA                                                                      | 0.795559  | 6.55678 | 3.43196  | 0.00443552 | 0.99974 | 67.9823 | -3.23071 |
| 10591127 | Fat3          | FAT tumor suppressor homolog 3 (Drosophila)                             | -0.412256 | 6.70898 | -3.41844 | 0.00455244 | 0.99974 | 68.9821 | -3.23846 |
| 10489498 | Dbn2          | dysbindin (dystrobrevin binding protein 1) domain containing 2          | -0.378336 | 8.72572 | -3.41806 | 0.00455575 | 0.99974 | 69.9818 | -3.23868 |
| 10531256 | AU017193      | expressed sequence AU017193                                             | 0.479233  | 8.74699 | 3.41243  | 0.00460536 | 0.99974 | 70.9816 | -3.24191 |
| 10459335 | Fam38b        | family with sequence similarity 38, member B                            | -0.41095  | 8.3969  | -3.40031 | 0.00471408 | 0.99974 | 71.9813 | -3.24888 |
| 10528909 | NA            | NA                                                                      | 0.412208  | 5.01144 | 3.39542  | 0.00475871 | 0.99974 | 72.981  | -3.2517  |
| 10491751 | NA            | NA                                                                      | 0.400933  | 4.86331 | 3.39481  | 0.00476422 | 0.99974 | 73.9808 | -3.25204 |
| 10404356 | Gm11362       | predicted gene 11362                                                    | 0.444179  | 6.0253  | 3.39335  | 0.00477771 | 0.99974 | 74.9805 | -3.25289 |
| 10549588 | Rps9          | ribosomal protein S9                                                    | 0.444991  | 8.481   | 3.39107  | 0.00479872 | 0.99974 | 75.9803 | -3.2542  |
| 10559720 | Rasl2-9       | RAS-like, family 2, locus 9                                             | 0.413693  | 5.2996  | 3.39005  | 0.00480815 | 0.99974 | 76.98   | -3.25479 |
| 10601901 | 1700014N06Rik | RIKEN cDNA 1700014N06 gene                                              | -0.349988 | 6.25227 | -3.38543 | 0.00485108 | 0.99974 | 77.9797 | -3.25745 |
| 10423791 | 4930447A16Rik | RIKEN cDNA 4930447A16 gene                                              | 0.38045   | 7.31427 | 3.3808   | 0.00489452 | 0.99974 | 78.9795 | -3.26013 |
| 10385361 | Ublcp1        | ubiquitin-like domain containing CTD phosphatase 1                      | 0.456992  | 6.85859 | 3.37414  | 0.00495777 | 0.99974 | 79.9792 | -3.26398 |
| 10379820 | Acaca         | acetyl-Coenzyme A carboxylase alpha                                     | 0.392393  | 6.44395 | 3.37388  | 0.0049602  | 0.99974 | 80.979  | -3.26413 |
| 10502196 | Rpl34         | ribosomal protein L34                                                   | 0.490493  | 7.7111  | 3.3708   | 0.00498972 | 0.99974 | 81.9787 | -3.26591 |
| 10449315 | 2900010M23Rik | RIKEN cDNA 2900010M23 gene                                              | 0.409676  | 7.28556 | 3.36783  | 0.00501839 | 0.99974 | 82.9784 | -3.26763 |
| 10398436 | NA            | NA                                                                      | 0.421356  | 5.81077 | 3.35061  | 0.00518761 | 0.99974 | 83.9782 | -3.27761 |
| 10362701 | Ddo           | D-aspartate oxidase                                                     | -0.397428 | 6.60611 | -3.34269 | 0.00526739 | 0.99974 | 84.9779 | -3.28221 |
| 10362464 | Sult3a1       | sulfotransferase family 3A, member 1                                    | 0.343831  | 4.09553 | 3.34178  | 0.00527663 | 0.99974 | 85.9777 | -3.28274 |
| 10558673 | Cyp2e1        | cytochrome P450, family 2, subfamily e, polypeptide 1                   | -0.448347 | 6.49815 | -3.33683 | 0.00532719 | 0.99974 | 86.9774 | -3.28562 |
| 10555889 | Olfr663       | olfactory receptor 663                                                  | -0.339602 | 5.40881 | -3.33062 | 0.00539126 | 0.99974 | 87.9771 | -3.28924 |
| 10502232 | Aimp1         | aminoacyl tRNA synthetase complex-interacting multifunctional protein 1 | 0.420358  | 7.65227 | 3.32091  | 0.00549316 | 0.99974 | 88.9769 | -3.2949  |
| 10487787 | Gfra4         | glial cell line derived neurotrophic factor family receptor alpha 4     | -0.376214 | 6.40474 | -3.32074 | 0.0054949  | 0.99974 | 89.9766 | -3.295   |
| 10352867 | Plxna2        | plexin A2                                                               | -0.396768 | 8.15347 | -3.31557 | 0.00554994 | 0.99974 | 90.9764 | -3.29802 |
| 10461150 | NA            | NA                                                                      | 0.676264  | 6.68441 | 3.31229  | 0.00558518 | 0.99974 | 91.9761 | -3.29993 |
| 10551250 | NA            | NA                                                                      | -0.495268 | 4.78869 | -3.30366 | 0.00567884 | 0.99974 | 92.9758 | -3.30498 |

|          |                 |                                                                                               |           |         |          |            |         |         |          |
|----------|-----------------|-----------------------------------------------------------------------------------------------|-----------|---------|----------|------------|---------|---------|----------|
| 10447036 | NA              | NA                                                                                            | 0.4435    | 4.47186 | 3.29427  | 0.00578258 | 0.99974 | 93.9756 | -3.31048 |
| 10524781 | Rab35           | RAB35, member RAS oncogene family                                                             | 0.374547  | 6.99902 | 3.28919  | 0.00583947 | 0.99974 | 94.9753 | -3.31346 |
| 10541751 | NA              | NA                                                                                            | 0.426405  | 5.3623  | 3.28798  | 0.00585312 | 0.99974 | 95.9751 | -3.31417 |
| 10514323 | ENSMUSG00000073 | predicted gene, ENSMUSG00000073810                                                            | -0.376156 | 7.66613 | -3.28205 | 0.00592043 | 0.99974 | 96.9748 | -3.31765 |
| 10582376 | NA              | NA                                                                                            | -0.366388 | 8.24464 | -3.27238 | 0.00603187 | 0.99974 | 97.9745 | -3.32334 |
| 10453705 | Rab18           | RAB18, member RAS oncogene family                                                             | 0.423374  | 8.22825 | 3.26041  | 0.00617263 | 0.99974 | 98.9743 | -3.33038 |
| 10513145 | Ptpn3           | protein tyrosine phosphatase, non-receptor type 3                                             | 0.400102  | 8.02058 | 3.26035  | 0.00617341 | 0.99974 | 99.974  | -3.33042 |
| 10604100 | Ndufa1          | NADH dehydrogenase (ubiquinone) 1 alpha subcomplex, 1                                         | 0.390411  | 8.35931 | 3.25491  | 0.00623848 | 0.99974 | 100.974 | -3.33363 |
| 10450892 | Olfr113         | olfactory receptor 113                                                                        | -0.335693 | 6.08885 | -3.25346 | 0.00625597 | 0.99974 | 101.974 | -3.33448 |
| 10424097 | Med30           | mediator complex subunit 30                                                                   | 0.372509  | 7.54471 | 3.24796  | 0.00632268 | 0.99974 | 102.973 | -3.33773 |
| 10351099 | Tnfsf18         | tumor necrosis factor (ligand) superfamily, member 18                                         | -0.375113 | 6.25688 | -3.24433 | 0.00636711 | 0.99974 | 103.973 | -3.33987 |
| 10368240 | Tcf21           | transcription factor 21                                                                       | 0.334582  | 8.22756 | 3.23481  | 0.00648497 | 0.99974 | 104.973 | -3.3455  |
| 10485773 | Olfr1290        | olfactory receptor 1290                                                                       | 0.514003  | 4.59214 | 3.2264   | 0.00659111 | 0.99974 | 105.972 | -3.35048 |
| 10542021 | Gm6487          | predicted gene 6487                                                                           | 0.470373  | 6.17294 | 3.22532  | 0.00660485 | 0.99974 | 106.972 | -3.35112 |
| 10356510 | lqca            | IQ motif containing with AAA domain                                                           | 0.396733  | 7.56423 | 3.20793  | 0.00683005 | 0.99974 | 107.972 | -3.36144 |
| 10568480 | Nsmce4a         | non-SMC element 4 homolog A ( <i>S. cerevisiae</i> )                                          | 0.337087  | 8.14697 | 3.20751  | 0.00683562 | 0.99974 | 108.972 | -3.36169 |
| 10356331 | NA              | NA                                                                                            | 0.687704  | 4.04208 | 3.20567  | 0.00685995 | 0.99974 | 109.971 | -3.36279 |
| 10503613 | Gm11878         | predicted gene 11878                                                                          | 0.477952  | 6.73844 | 3.20552  | 0.00686187 | 0.99974 | 110.971 | -3.36287 |
| 10405994 | Med10           | mediator of RNA polymerase II transcription, subunit 10 homolog (NUT2, <i>S. cerevisiae</i> ) | 0.342849  | 8.53708 | 3.20129  | 0.00691817 | 0.99974 | 111.971 | -3.36539 |
| 10561679 | Psmid8          | proteasome (prosome, macropain) 26S subunit, non-ATPase, 8                                    | 0.379488  | 8.244   | 3.19992  | 0.00693648 | 0.99974 | 112.971 | -3.36621 |
| 10454601 | Tslp            | thymic stromal lymphopoietin                                                                  | 0.371879  | 6.33729 | 3.19984  | 0.00693746 | 0.99974 | 113.97  | -3.36625 |
| 10410919 | Gm5666          | predicted gene 5666                                                                           | 0.556695  | 5.77227 | 3.19816  | 0.00695998 | 0.99974 | 114.97  | -3.36725 |
| 10440136 | Olfr173         | olfactory receptor 173                                                                        | -0.365915 | 5.67032 | -3.19791 | 0.00696333 | 0.99974 | 115.97  | -3.3674  |
| 10373608 | Olfr766         | olfactory receptor 766                                                                        | 0.460026  | 4.22843 | 3.19457  | 0.00700836 | 0.99974 | 116.97  | -3.36939 |
| 10575144 | Nip7            | nuclear import 7 homolog ( <i>S. cerevisiae</i> )                                             | 0.450251  | 7.04271 | 3.19386  | 0.00701798 | 0.99974 | 117.969 | -3.36981 |
| 10501319 | Celsr2          | cadherin, EGF LAG seven-pass G-type receptor 2 (flamingo homolog, <i>Drosophila</i> )         | -0.332055 | 7.32907 | -3.19263 | 0.00703468 | 0.99974 | 118.969 | -3.37055 |
| 10437236 | B230307C23Rik   | RIKEN cDNA B230307C23 gene                                                                    | 0.502488  | 7.80415 | 3.18055  | 0.00720044 | 0.99974 | 119.969 | -3.37774 |
| 10374840 | NA              | NA                                                                                            | -0.69131  | 6.77759 | -3.17482 | 0.00728045 | 0.99974 | 120.969 | -3.38117 |
| 10594513 | NA              | NA                                                                                            | 0.563947  | 5.00056 | 3.17398  | 0.0072923  | 0.99974 | 121.968 | -3.38167 |
| 10385325 | Pttg1           | pituitary tumor-transforming gene 1                                                           | 0.327658  | 7.56947 | 3.1733   | 0.00730184 | 0.99974 | 122.968 | -3.38207 |
| 10368041 | 3110003A17Rik   | RIKEN cDNA 3110003A17 gene                                                                    | 0.406874  | 8.9161  | 3.16779  | 0.00737984 | 0.99974 | 123.968 | -3.38537 |
| 10503017 | NA              | NA                                                                                            | 0.352341  | 4.0535  | 3.16389  | 0.00743559 | 0.99974 | 124.968 | -3.3877  |
| 10421975 | 2410129H14Rik   | RIKEN cDNA 2410129H14 gene                                                                    | 0.34447   | 7.09636 | 3.16199  | 0.00746289 | 0.99974 | 125.967 | -3.38884 |
| 10349968 | Chi3l1          | chitinase 3-like 1                                                                            | -0.439299 | 9.42289 | -3.15833 | 0.00751579 | 0.99974 | 126.967 | -3.39103 |

|          |               |                                                            |           |         |          |            |         |         |          |
|----------|---------------|------------------------------------------------------------|-----------|---------|----------|------------|---------|---------|----------|
| 10578017 | Gm9911        | predicted gene 9911                                        | -0.392409 | 5.58299 | -3.15817 | 0.00751808 | 0.99974 | 127.967 | -3.39112 |
| 10532616 | Myo18b        | myosin XVIIIb                                              | 0.364004  | 6.72783 | 3.15432  | 0.0075741  | 0.99974 | 128.966 | -3.39343 |
| 10568432 | 1110007A13Rik | RIKEN cDNA 1110007A13 gene                                 | -0.376506 | 6.66925 | -3.14894 | 0.00765311 | 0.99974 | 129.966 | -3.39665 |
| 10556139 | Olfr494       | olfactory receptor 494                                     | 0.335951  | 5.70156 | 3.14537  | 0.00770603 | 0.99974 | 130.966 | -3.39879 |
| 10542310 | Cdkn1b        | cyclin-dependent kinase inhibitor 1B                       | 0.322743  | 7.4358  | 3.13861  | 0.00780712 | 0.99974 | 131.966 | -3.40285 |
| 10543054 | Shfm1         | split hand/foot malformation (ectrodactyly) type 1         | 0.413961  | 8.59829 | 3.13804  | 0.0078157  | 0.99974 | 132.965 | -3.40319 |
| 10458046 | D0H4S114      | DNA segment, human D4S114                                  | 0.357656  | 8.36456 | 3.13534  | 0.00785645 | 0.99974 | 133.965 | -3.40481 |
| 10390691 | Nr1d1         | nuclear receptor subfamily 1, group D, member 1            | -0.404887 | 9.01994 | -3.13424 | 0.00787319 | 0.99974 | 134.965 | -3.40547 |
| 10563949 | NA            | NA                                                         | 0.410124  | 3.81363 | 3.12739  | 0.00797785 | 0.99974 | 135.965 | -3.40959 |
| 10534935 | Pilrb1        | paired immunoglobulin-like type 2 receptor beta 1          | 0.371337  | 6.47255 | 3.12591  | 0.00800073 | 0.99974 | 136.964 | -3.41048 |
| 10416850 | Scel          | sciellin                                                   | -0.402916 | 9.35264 | -3.11044 | 0.00824302 | 0.99974 | 137.964 | -3.4198  |
| 10604891 | NA            | NA                                                         | -0.342313 | 4.24703 | -3.11035 | 0.00824441 | 0.99974 | 138.964 | -3.41985 |
| 10373515 | Suox          | sulfite oxidase                                            | 0.34654   | 6.43636 | 3.10662  | 0.0083039  | 0.99974 | 139.964 | -3.4221  |
| 10601854 | Wbp5          | WW domain binding protein 5                                | 0.438723  | 9.82105 | 3.09855  | 0.00843416 | 0.99974 | 140.963 | -3.42697 |
| 10595371 | Hmgn3         | high mobility group nucleosomal binding domain 3           | 0.358321  | 6.92778 | 3.09474  | 0.00849645 | 0.99974 | 141.963 | -3.42927 |
| 10348556 | Ube2f         | ubiquitin-conjugating enzyme E2F (putative)                | 0.407006  | 5.23026 | 3.09457  | 0.00849924 | 0.99974 | 142.963 | -3.42938 |
| 10580450 | NA            | NA                                                         | -0.471544 | 6.70841 | -3.09242 | 0.00853445 | 0.99974 | 143.963 | -3.43067 |
| 10509568 | Camk2n1       | calcium/calmodulin-dependent protein kinase II inhibitor 1 | 0.319388  | 8.53864 | 3.09156  | 0.0085487  | 0.99974 | 144.962 | -3.4312  |
| 10428089 | Nipal2        | NIPA-like domain containing 2                              | -0.369195 | 7.76589 | -3.09041 | 0.00856764 | 0.99974 | 145.962 | -3.43189 |
| 10543017 | Pdk4          | pyruvate dehydrogenase kinase, isoenzyme 4                 | -0.389871 | 7.65304 | -3.09017 | 0.00857166 | 0.99974 | 146.962 | -3.43204 |
| 10494910 | Bcas2         | breast carcinoma amplified sequence 2                      | 0.327508  | 7.74874 | 3.08199  | 0.00870788 | 0.99974 | 147.962 | -3.43698 |
| 10588464 | NA            | NA                                                         | 0.398114  | 6.10151 | 3.06995  | 0.00891243 | 0.99974 | 148.961 | -3.44428 |
| 10345077 | Khdc1a        | KH domain containing 1A                                    | 0.432088  | 4.88996 | 3.06804  | 0.00894524 | 0.99974 | 149.961 | -3.44543 |
| 10439790 | Trat1         | T cell receptor associated transmembrane adaptor 1         | -0.426431 | 5.16279 | -3.06795 | 0.00894672 | 0.99974 | 150.961 | -3.44548 |
| 10358541 | Hmcn1         | hemicentin 1                                               | -0.504266 | 7.82509 | -3.06499 | 0.00899796 | 0.99974 | 151.961 | -3.44728 |
| 10531987 | Gbp4          | guanylate binding protein 4                                | -0.359049 | 8.99864 | -3.06323 | 0.0090286  | 0.99974 | 152.96  | -3.44835 |
| 10560370 | Psg26         | pregnancy-specific glycoprotein 26                         | 0.394252  | 5.04822 | 3.06314  | 0.00903014 | 0.99974 | 153.96  | -3.4484  |
| 10605499 | 3426406K10Rik | RIKEN cDNA 3426406K10 gene                                 | 0.325641  | 3.72933 | 3.06222  | 0.00904612 | 0.99974 | 154.96  | -3.44896 |
| 10584194 | Srpr          | signal recognition particle receptor ('docking protein')   | 0.349979  | 7.75    | 3.06064  | 0.00907383 | 0.99974 | 155.959 | -3.44992 |
| 10415013 | NA            | NA                                                         | -0.367148 | 10.4464 | -3.05619 | 0.00915195 | 0.99974 | 156.959 | -3.45262 |
| 10511734 | Cnbd1         | cyclic nucleotide binding domain containing 1              | -0.344721 | 5.06365 | -3.05365 | 0.00919688 | 0.99974 | 157.959 | -3.45417 |
| 10467258 | Myof          | myoferlin                                                  | -0.386663 | 8.79882 | -3.05333 | 0.00920245 | 0.99974 | 158.959 | -3.45436 |
| 10585377 | NA            | NA                                                         | -0.320668 | 8.42251 | -3.05201 | 0.009226   | 0.99974 | 159.958 | -3.45516 |
| 10556158 | Olfr508       | olfactory receptor 508                                     | -0.441725 | 5.55996 | -3.04825 | 0.00929305 | 0.99974 | 160.958 | -3.45745 |

|          |               |                                                                      |           |         |          |            |         |         |          |
|----------|---------------|----------------------------------------------------------------------|-----------|---------|----------|------------|---------|---------|----------|
| 10591192 | Olf847        | olfactory receptor 847                                               | 0.367351  | 4.44963 | 3.04263  | 0.00939427 | 0.99974 | 161.958 | -3.46086 |
| 10361021 | NA            | NA                                                                   | 0.329993  | 6.3512  | 3.04138  | 0.00941689 | 0.99974 | 162.958 | -3.46162 |
| 10529732 | Hs3st1        | heparan sulfate (glucosamine) 3-O-sulfotransferase 1                 | 0.339965  | 6.87133 | 3.04126  | 0.00941911 | 0.99974 | 163.957 | -3.4617  |
| 10577992 | NA            | NA                                                                   | 0.351906  | 4.20975 | 3.04108  | 0.00942237 | 0.99974 | 164.957 | -3.46181 |
| 10548314 | Klrb1b        | killer cell lectin-like receptor subfamily B member 1B               | -0.332795 | 6.26913 | -3.04079 | 0.00942767 | 0.99974 | 165.957 | -3.46198 |
| 10538706 | Mmrn1         | multimerin 1                                                         | -0.349114 | 6.46271 | -3.0346  | 0.00954074 | 0.99974 | 166.957 | -3.46575 |
| 10354275 | 1700029F09Rik | RIKEN cDNA 1700029F09 gene                                           | 0.345624  | 6.89791 | 3.02995  | 0.00962671 | 0.99974 | 167.956 | -3.46859 |
| 10584580 | NA            | NA                                                                   | 0.392751  | 10.2492 | 3.02904  | 0.00964367 | 0.99974 | 168.956 | -3.46914 |
| 10399874 | Bcap29        | B-cell receptor-associated protein 29                                | 0.340392  | 8.83204 | 3.02887  | 0.00964677 | 0.99974 | 169.956 | -3.46924 |
| 10519913 | Magi2         | membrane associated guanylate kinase, WW and PDZ domain containing 2 | 0.335489  | 6.70444 | 3.02867  | 0.00965042 | 0.99974 | 170.956 | -3.46936 |
| 10504534 | Frmpd1        | FERM and PDZ domain containing 1                                     | -0.329539 | 6.4424  | -3.02799 | 0.00966303 | 0.99974 | 171.955 | -3.46978 |
| 10541678 | C1r           | complement component 1, r subcomponent                               | -0.326164 | 7.08968 | -3.02759 | 0.00967064 | 0.99974 | 172.955 | -3.47003 |
| 10437629 | Grin2a        | glutamate receptor, ionotropic, NMDA2A (epsilon 1)                   | 0.376081  | 5.77207 | 3.02457  | 0.00972706 | 0.99974 | 173.955 | -3.47187 |
| 10524060 | Gm10417       | predicted gene 10417                                                 | 0.422505  | 6.45305 | 3.02091  | 0.00979576 | 0.99974 | 174.955 | -3.47409 |
| 10415645 | Mrp63         | mitochondrial ribosomal protein 63                                   | 0.335667  | 7.53369 | 3.01733  | 0.00986364 | 0.99974 | 175.954 | -3.47628 |
| 10600476 | Gm4989        | predicted gene 4989                                                  | 0.357327  | 6.53417 | 3.01725  | 0.00986511 | 0.99974 | 176.954 | -3.47633 |
| 10382104 | NA            | NA                                                                   | 1.05795   | 6.86346 | 3.0153   | 0.00990237 | 0.99974 | 177.954 | -3.47752 |
| 10401630 | Acyp1         | acylphosphatase 1, erythrocyte (common) type                         | 0.369362  | 7.43618 | 3.00728  | 0.0100566  | 0.99974 | 178.953 | -3.48242 |
| 10476512 | Snap25        | synaptosomal-associated protein 25                                   | -0.340495 | 6.57843 | -3.00617 | 0.010078   | 0.99974 | 179.953 | -3.4831  |
| 10604499 | Olf1323       | olfactory receptor 1323                                              | -0.33169  | 5.68804 | -3.00197 | 0.0101599  | 0.99974 | 180.953 | -3.48567 |
| 10466266 | Stx3          | syntaxin 3                                                           | -0.381018 | 6.58632 | -2.99998 | 0.010199   | 0.99974 | 181.953 | -3.48688 |
| 10583465 | Ubl5          | ubiquitin-like 5                                                     | 0.351284  | 9.3659  | 2.99866  | 0.0102249  | 0.99974 | 182.952 | -3.48769 |
| 10365983 | Lum           | lumican                                                              | 0.414583  | 6.22349 | 2.99819  | 0.0102342  | 0.99974 | 183.952 | -3.48798 |
| 10469046 | Phyh          | phytanoyl-CoA hydroxylase                                            | 0.32388   | 8.5517  | 2.9917   | 0.0103629  | 0.99974 | 184.952 | -3.49195 |
| 10503374 | NA            | NA                                                                   | -0.323397 | 5.84588 | -2.99109 | 0.0103751  | 0.99974 | 185.952 | -3.49232 |
| 10484630 | Olf1090       | olfactory receptor 1090                                              | 0.354311  | 4.84887 | 2.98562  | 0.0104851  | 0.99974 | 186.951 | -3.49568 |
| 10585988 | Myo9a         | myosin IXa                                                           | -0.670895 | 9.42786 | -2.98546 | 0.0104882  | 0.99974 | 187.951 | -3.49577 |
| 10348376 | Heatr7b1      | HEAT repeat containing 7B1                                           | 0.315009  | 6.27446 | 2.98063  | 0.0105862  | 0.99974 | 188.951 | -3.49873 |
| 10368229 | Tbpl1         | TATA box binding protein-like 1                                      | 0.324927  | 8.01357 | 2.97703  | 0.0106598  | 0.99974 | 189.951 | -3.50094 |
| 10356154 | Sphkap        | SPHK1 interactor, AKAP domain containing                             | 0.314051  | 5.85424 | 2.97696  | 0.0106614  | 0.99974 | 190.95  | -3.50099 |
| 10436600 | NA            | NA                                                                   | 0.473024  | 6.81966 | 2.97662  | 0.0106684  | 0.99974 | 191.95  | -3.50119 |
| 10423834 | Gm7194        | predicted gene 7194                                                  | 0.402866  | 4.58921 | 2.97544  | 0.0106925  | 0.99974 | 192.95  | -3.50191 |
| 10593225 | Zbtb16        | zinc finger and BTB domain containing 16                             | -0.528724 | 8.54308 | -2.97337 | 0.0107353  | 0.99974 | 193.95  | -3.50319 |
| 10555903 | Olf676        | olfactory receptor 676                                               | -0.318488 | 5.1792  | -2.97153 | 0.0107733  | 0.99974 | 194.949 | -3.50431 |
| 10527959 | NA            | NA                                                                   | -0.299588 | 7.19192 | -2.97057 | 0.0107934  | 0.99974 | 195.949 | -3.50491 |

|          |               |                                                                    |           |         |          |           |         |         |          |
|----------|---------------|--------------------------------------------------------------------|-----------|---------|----------|-----------|---------|---------|----------|
| 10599680 | 3830403N18Rik | RIKEN cDNA 3830403N18 gene                                         | 0.528995  | 4.68024 | 2.9665   | 0.0108782 | 0.99974 | 196.949 | -3.5074  |
| 10393662 | Nptx1         | neuronal pentraxin 1                                               | 0.310032  | 6.80638 | 2.9665   | 0.0108782 | 0.99974 | 197.949 | -3.5074  |
| 10440794 | 2610039C10Rik | RIKEN cDNA 2610039C10 gene                                         | 0.360794  | 7.04399 | 2.96593  | 0.0108902 | 0.99974 | 198.948 | -3.50775 |
| 10572786 | Ap1m1         | adaptor-related protein complex AP-1, mu subunit 1                 | 0.331736  | 7.5726  | 2.9639   | 0.0109329 | 0.99974 | 199.948 | -3.509   |
| 10387733 | Eif5a         | eukaryotic translation initiation factor 5A                        | -0.339    | 7.79341 | -2.9595  | 0.0110259 | 0.99974 | 200.948 | -3.51171 |
| 10532989 | Gatc          | glutamyl-tRNA(Gln) amidotransferase, subunit C homolog (bacterial) | -0.326756 | 8.1793  | -2.9526  | 0.0111733 | 0.99974 | 201.948 | -3.51595 |
| 10544583 | Gimap6        | GTPase, IMAP family member 6                                       | 0.330097  | 8.35862 | 2.95113  | 0.0112049 | 0.99974 | 202.947 | -3.51685 |
| 10404010 | V1rh5         | vomeronasal 1 receptor, H5                                         | 0.358032  | 4.5236  | 2.95062  | 0.0112158 | 0.99974 | 203.947 | -3.51716 |
| 10375941 | Vdac1         | voltage-dependent anion channel 1                                  | 0.445109  | 8.33665 | 2.94992  | 0.011231  | 0.99974 | 204.947 | -3.51759 |
| 10416533 | Ccdc122       | coiled-coil domain containing 122                                  | 0.364077  | 6.21623 | 2.94346  | 0.0113714 | 0.99974 | 205.946 | -3.52157 |
| 10395594 | NA            | NA                                                                 | 0.319375  | 5.57383 | 2.94279  | 0.0113863 | 0.99974 | 206.946 | -3.52199 |
| 10532538 | Asphd2        | aspartate beta-hydroxylase domain containing 2                     | -0.316676 | 6.30671 | -2.94113 | 0.0114227 | 0.99974 | 207.946 | -3.52301 |
| 10566678 | Olf485        | olfactory receptor 485                                             | 0.327017  | 6.0529  | 2.94011  | 0.011445  | 0.99974 | 208.946 | -3.52363 |
| 10535849 | Slc46a3       | solute carrier family 46, member 3                                 | 0.328978  | 7.28596 | 2.9395   | 0.0114584 | 0.99974 | 209.945 | -3.52401 |
| 10405633 | Ntrk2         | neurotrophic tyrosine kinase, receptor, type 2                     | -0.337763 | 6.77365 | -2.93849 | 0.0114809 | 0.99974 | 210.945 | -3.52464 |
| 10601846 | 2900062L11Rik | signal peptidase complex subunit 3 homolog pseudogene              | 0.366684  | 6.17339 | 2.9333   | 0.011596  | 0.99974 | 211.945 | -3.52783 |
| 10434747 | Adipoq        | adiponectin, C1Q and collagen domain containing                    | -0.388314 | 6.32967 | -2.93221 | 0.0116203 | 0.99974 | 212.945 | -3.5285  |
| 10535426 | Spdyb         | speedy homolog B (Drosophila)                                      | 0.333991  | 6.75043 | 2.92391  | 0.0118074 | 0.99974 | 213.944 | -3.53362 |
| 10575249 | Txn14b        | thioredoxin-like 4B                                                | 0.360869  | 7.01972 | 2.92369  | 0.0118124 | 0.99974 | 214.944 | -3.53376 |
| 10482846 | Ccdc148       | coiled-coil domain containing 148                                  | 0.302247  | 5.95653 | 2.92304  | 0.0118271 | 0.99974 | 215.944 | -3.53416 |
| 10407454 | Gm9973        | predicted gene 9973                                                | 0.342904  | 5.07028 | 2.92208  | 0.0118491 | 0.99974 | 216.944 | -3.53476 |
| 10472570 | Ppig          | peptidyl-prolyl isomerase G (cyclophilin G)                        | -0.376277 | 9.33227 | -2.92128 | 0.0118672 | 0.99974 | 217.943 | -3.53525 |
| 10569020 | Ifitm6        | interferon induced transmembrane protein 6                         | 0.368111  | 5.94734 | 2.92106  | 0.0118724 | 0.99974 | 218.943 | -3.53539 |
| 10471519 | Tor2a         | torsin family 2, member A                                          | -0.304024 | 6.69972 | -2.91786 | 0.0119457 | 0.99974 | 219.943 | -3.53736 |
| 10483865 | Fkbp7         | FK506 binding protein 7                                            | 0.339251  | 8.31528 | 2.91777  | 0.0119476 | 0.99974 | 220.943 | -3.53741 |
| 10436046 | NA            | NA                                                                 | -0.316505 | 5.91363 | -2.91754 | 0.011953  | 0.99974 | 221.942 | -3.53756 |
| 10346882 | Adam23        | a disintegrin and metallopeptidase domain 23                       | -0.361632 | 7.14339 | -2.91291 | 0.0120599 | 0.99974 | 222.942 | -3.54042 |
| 10571364 | 1700016D18Rik | RIKEN cDNA 1700016D18 gene                                         | -0.349407 | 5.02613 | -2.91151 | 0.0120923 | 0.99974 | 223.942 | -3.54128 |
| 10570397 | Cdc16         | CDC16 cell division cycle 16 homolog (S. cerevisiae)               | 0.292675  | 7.31836 | 2.8998   | 0.0123678 | 0.99974 | 224.942 | -3.54852 |
| 10447429 | Gm4832        | predicted gene 4832                                                | 0.304191  | 8.6452  | 2.89788  | 0.0124136 | 0.99974 | 225.941 | -3.54971 |
| 10554445 | Prc1          | protein regulator of cytokinesis 1                                 | 0.313747  | 7.24117 | 2.8836   | 0.012759  | 0.99974 | 226.941 | -3.55856 |
| 10372595 | NA            | NA                                                                 | 0.442481  | 5.06455 | 2.88049  | 0.0128355 | 0.99974 | 227.941 | -3.56049 |
| 10572757 | Rab8a         | RAB8A, member RAS oncogene family                                  | 0.369842  | 8.77382 | 2.88009  | 0.0128454 | 0.99974 | 228.941 | -3.56074 |

|                 |                  |                                                                                                  |                  |                |                 |                  |                |                |                 |
|-----------------|------------------|--------------------------------------------------------------------------------------------------|------------------|----------------|-----------------|------------------|----------------|----------------|-----------------|
| 10358140        | Igfn1            | immunoglobulin-like and fibronectin type III domain containing 1                                 | -0.354352        | 6.62017        | -2.87821        | 0.0128918        | 0.99974        | 229.94         | -3.5619         |
| 10529979        | Ppargc1a         | peroxisome proliferative activated receptor, gamma, coactivator 1 alpha                          | -0.362282        | 8.08211        | -2.87599        | 0.0129469        | 0.99974        | 230.94         | -3.56327        |
| 10451547        | Gm16494          | predicted gene 16494                                                                             | 0.410902         | 7.87201        | 2.8743          | 0.0129892        | 0.99974        | 231.94         | -3.56433        |
| 10591120        | Fat3             | FAT tumor suppressor homolog 3 (Drosophila)                                                      | -0.519333        | 6.94637        | -2.87211        | 0.0130438        | 0.99974        | 232.939        | -3.56568        |
| 10453250        | NA               | NA                                                                                               | 0.511807         | 5.96561        | 2.8715          | 0.0130592        | 0.99974        | 233.939        | -3.56606        |
| 10606174        | Nap1l2           | nucleosome assembly protein 1-like 2                                                             | 0.305634         | 4.94573        | 2.87114         | 0.0130682        | 0.99974        | 234.939        | -3.56629        |
| 10555323        | P4ha3            | procollagen-proline, 2-oxoglutarate 4-dioxygenase (proline 4-hydroxylase), alpha polypeptide III | -0.312157        | 6.09674        | -2.86682        | 0.0131771        | 0.99974        | 235.939        | -3.56897        |
| 10484514        | Olf993           | olfactory receptor 993                                                                           | -0.42357         | 5.28773        | -2.8665         | 0.0131853        | 0.99974        | 236.938        | -3.56917        |
| 10578423        | LOC100045396     | hypothetical protein LOC100045396                                                                | -0.350349        | 6.96776        | -2.86351        | 0.0132612        | 0.99974        | 237.938        | -3.57103        |
| 10561918        | NA               | NA                                                                                               | -0.324304        | 6.32912        | -2.86257        | 0.0132851        | 0.99974        | 238.938        | -3.57161        |
| 10515519        | Atp6v0b          | ATPase, H+ transporting, lysosomal V0 subunit B                                                  | 0.309161         | 7.88358        | 2.86044         | 0.0133397        | 0.99974        | 239.938        | -3.57293        |
| 10498160        | Ufm1             | ubiquitin-fold modifier 1                                                                        | 0.384141         | 6.99759        | 2.85864         | 0.0133858        | 0.99974        | 240.937        | -3.57405        |
| 10358191        | Camsap1l1        | calmodulin regulated spectrin-associated protein 1-like 1                                        | -0.29952         | 9.76029        | -2.85705        | 0.0134268        | 0.99974        | 241.937        | -3.57504        |
| 10604974        | Cetn2            | centrin 2                                                                                        | 0.399256         | 6.44102        | 2.85552         | 0.0134662        | 0.99974        | 242.937        | -3.57599        |
| 10414965        | NA               | NA                                                                                               | -0.488683        | 4.58819        | -2.85312        | 0.0135284        | 0.99974        | 243.937        | -3.57748        |
| 10431915        | Slc38a4          | solute carrier family 38, member 4                                                               | -0.335483        | 6.4855         | -2.85103        | 0.0135829        | 0.99974        | 244.936        | -3.57878        |
| 10531869        | Mapk10           | mitogen-activated protein kinase 10                                                              | -0.334928        | 6.36566        | -2.84993        | 0.0136116        | 0.99974        | 245.936        | -3.57947        |
| 10380472        | NA               | NA                                                                                               | 0.400172         | 5.4583         | 2.84917         | 0.0136314        | 0.99974        | 246.936        | -3.57994        |
| 10484689        | Olf1137          | olfactory receptor 1137                                                                          | 0.350737         | 5.24605        | 2.84821         | 0.0136566        | 0.99974        | 247.936        | -3.58054        |
| 10428698        | Sntb1            | syntrophin, basic 1                                                                              | -0.301502        | 9.03737        | -2.84579        | 0.0137201        | 0.99974        | 248.935        | -3.58204        |
| 10473505        | Olf1076          | olfactory receptor 1076                                                                          | 0.292592         | 5.3971         | 2.84236         | 0.0138108        | 0.99974        | 249.935        | -3.58417        |
| 10606902        | Tmsb15b1-Tmsb15b | Tmsb15b1-Tmsb15b2 readthrough transcript                                                         | 0.422315         | 5.37541        | 2.84173         | 0.0138275        | 0.99974        | 250.935        | -3.58457        |
| 10450731        | H2-t9            | MHC class Ib T9                                                                                  | -0.345891        | 6.93298        | -2.84009        | 0.0138712        | 0.99974        | 251.935        | -3.58559        |
| 10356339        | Pde6d            | phosphodiesterase 6D, cGMP-specific, rod, delta                                                  | 0.312549         | 7.95546        | 2.83849         | 0.0139138        | 0.99974        | 252.934        | -3.58658        |
| 10351400        | Fam78b           | family with sequence similarity 78, member B                                                     | -0.341517        | 7.14479        | -2.83588        | 0.0139838        | 0.99974        | 253.934        | -3.58821        |
| 10403057        | LOC641089        | similar to Ig heavy chain V region BCL1 precursor                                                | -0.501974        | 5.3304         | -2.8331         | 0.0140586        | 0.99974        | 254.934        | -3.58994        |
| <b>10493860</b> | <b>Sprr2b</b>    | <b>small proline-rich protein 2B</b>                                                             | <b>-0.390935</b> | <b>5.75445</b> | <b>-2.83208</b> | <b>0.0140861</b> | <b>0.99974</b> | <b>255.933</b> | <b>-3.59058</b> |
| 10492165        | NA               | NA                                                                                               | 0.342739         | 5.37426        | 2.82707         | 0.0142222        | 0.99974        | 256.933        | -3.5937         |
| 10445839        | Kif6             | kinesin family member 6                                                                          | -0.341903        | 6.63841        | -2.82671        | 0.0142319        | 0.99974        | 257.933        | -3.59392        |
| 10513266        | Olf267           | olfactory receptor 267                                                                           | -0.29826         | 6.49039        | -2.82666        | 0.0142332        | 0.99974        | 258.933        | -3.59395        |
| 10603525        | Ssx2             | synovial sarcoma, X member B, breakpoint 2                                                       | 0.443822         | 5.61447        | 2.8264          | 0.0142404        | 0.99974        | 259.932        | -3.59412        |



|          |               |                                                                                                                              |           |         |          |           |         |         |          |
|----------|---------------|------------------------------------------------------------------------------------------------------------------------------|-----------|---------|----------|-----------|---------|---------|----------|
| 10548450 | Klra5         | killer cell lectin-like receptor, subfamily A, member 5                                                                      | -0.506346 | 4.92316 | -2.82497 | 0.0142795 | 0.99974 | 260.932 | -3.59501 |
| 10579744 | Large         | like-glycosyltransferase                                                                                                     | -0.289459 | 7.45578 | -2.82469 | 0.0142872 | 0.99974 | 261.932 | -3.59518 |
| 10344809 | Cspp1         | centrosome and spindle pole associated protein 1                                                                             | -0.374778 | 9.34257 | -2.82389 | 0.0143091 | 0.99974 | 262.932 | -3.59568 |
| 10548892 | Arhgdib       | Rho, GDP dissociation inhibitor (GDI) beta                                                                                   | 0.361514  | 10.1141 | 2.82282  | 0.0143386 | 0.99974 | 263.931 | -3.59635 |
| 10422176 | D130079A08Rik | RIKEN cDNA D130079A08 gene                                                                                                   | -0.34467  | 6.19417 | -2.82112 | 0.0143853 | 0.99974 | 264.931 | -3.59741 |
| 10525343 | Myl2          | myosin, light polypeptide 2, regulatory, cardiac, slow                                                                       | 0.309127  | 6.66144 | 2.81747  | 0.0144865 | 0.99974 | 265.931 | -3.59969 |
| 10357875 | Btg2          | B-cell translocation gene 2, anti-proliferative                                                                              | 0.364209  | 9.50337 | 2.81732  | 0.0144908 | 0.99974 | 266.931 | -3.59978 |
| 10562667 | NA            | NA                                                                                                                           | 0.333779  | 7.78448 | 2.81583  | 0.0145321 | 0.99974 | 267.93  | -3.60071 |
| 10433885 | Cebpd         | CCAAT/enhancer binding protein (C/EBP), delta                                                                                | 0.285619  | 7.40634 | 2.81567  | 0.0145367 | 0.99974 | 268.93  | -3.60081 |
| 10367120 | NA            | NA                                                                                                                           | 0.376142  | 6.4664  | 2.81564  | 0.0145376 | 0.99974 | 269.93  | -3.60083 |
| 10419223 | Fermt2        | fermitin family homolog 2 (Drosophila)                                                                                       | -0.327999 | 10.0418 | -2.81472 | 0.014563  | 0.99974 | 270.93  | -3.6014  |
| 10435305 | Itgb5         | integrin beta 5                                                                                                              | 0.311275  | 8.68807 | 2.8127   | 0.0146196 | 0.99974 | 271.929 | -3.60266 |
| 10451291 | Slc22a7       | solute carrier family 22 (organic anion transporter), member 7                                                               | -0.374063 | 6.45895 | -2.8118  | 0.014645  | 0.99974 | 272.929 | -3.60323 |
| 10416273 | Phyhip        | phytanoyl-CoA hydroxylase interacting protein                                                                                | 0.304964  | 6.45889 | 2.81152  | 0.0146529 | 0.99974 | 273.929 | -3.6034  |
| 10578796 | 4930431L04Rik | RIKEN cDNA 4930431L04 gene                                                                                                   | 0.299404  | 5.68547 | 2.80756  | 0.0147645 | 0.99974 | 274.929 | -3.60587 |
| 10594248 | Rplp1         | ribosomal protein, large, P1                                                                                                 | 0.399882  | 10.4469 | 2.80605  | 0.0148072 | 0.99974 | 275.928 | -3.60681 |
| 10550795 | Nlrp5         | NLR family, pyrin domain containing 5                                                                                        | 0.296744  | 6.26087 | 2.79743  | 0.0150541 | 0.99974 | 276.928 | -3.6122  |
| 10565341 | Gm6155        | predicted gene 6155                                                                                                          | 0.379283  | 7.8464  | 2.7959   | 0.0150982 | 0.99974 | 277.928 | -3.61316 |
| 10362899 | F830002L21Rik | RIKEN cDNA F830002L21 gene                                                                                                   | -0.326668 | 7.73264 | -2.79047 | 0.0152561 | 0.99974 | 278.928 | -3.61655 |
| 10395520 | Imp2l         | IMP2 inner mitochondrial membrane peptidase-like ( <i>S. cerevisiae</i> )                                                    | -0.330842 | 6.00597 | -2.78995 | 0.0152714 | 0.99974 | 279.927 | -3.61688 |
| 10564448 | Asb7          | ankyrin repeat and SOCS box-containing 7                                                                                     | 0.363203  | 6.88298 | 2.78945  | 0.0152861 | 0.99974 | 280.927 | -3.61719 |
| 10508135 | Trappc3       | trafficking protein particle complex 3                                                                                       | 0.345088  | 9.17337 | 2.78902  | 0.0152987 | 0.99974 | 281.927 | -3.61746 |
| 10563959 | NA            | NA                                                                                                                           | 0.461204  | 4.38361 | 2.78834  | 0.0153186 | 0.99974 | 282.926 | -3.61789 |
| 10540812 | Tatdn2        | TatD DNase domain containing 2                                                                                               | 0.311714  | 7.68015 | 2.7882   | 0.0153226 | 0.99974 | 283.926 | -3.61797 |
| 10481114 | Abo           | ABO blood group (transferase A, alpha 1-3-N-acetylgalactosaminyltransferase, transferase B, alpha 1-3-galactosyltransferase) | 0.349993  | 5.8814  | 2.78706  | 0.0153563 | 0.99974 | 284.926 | -3.61869 |
| 10475245 | Ubr1          | ubiquitin protein ligase E3 component n-recognin 1                                                                           | -0.318027 | 8.16752 | -2.78682 | 0.0153633 | 0.99974 | 285.926 | -3.61884 |
| 10466366 | Olf1499       | olfactory receptor 1499                                                                                                      | 0.32387   | 4.97297 | 2.78603  | 0.0153867 | 0.99974 | 286.925 | -3.61933 |
| 10535852 | Slc7a1        | solute carrier family 7 (cationic amino acid transporter, y+ system), member 1                                               | -0.302577 | 7.50582 | -2.78586 | 0.0153915 | 0.99974 | 287.925 | -3.61944 |

|          |               |                                                                                        |           |         |          |           |         |         |          |
|----------|---------------|----------------------------------------------------------------------------------------|-----------|---------|----------|-----------|---------|---------|----------|
| 10473602 | Olf1189       | olfactory receptor 1189                                                                | -0.297765 | 5.13049 | -2.78472 | 0.0154253 | 0.99974 | 288.925 | -3.62015 |
| 10557560 | Cdpt          | CDP-diacylglycerol--inositol 3-phosphatidyltransferase (phosphatidylinositol synthase) | 0.308977  | 7.01588 | 2.77983  | 0.0155703 | 0.99974 | 289.925 | -3.62321 |
| 10535575 | Gm6272        | predicted gene 6272                                                                    | 0.307523  | 8.1249  | 2.77704  | 0.015654  | 0.99974 | 290.924 | -3.62496 |
| 10545932 | Snrnp27       | small nuclear ribonucleoprotein 27 (U4/U6.U5)                                          | 0.314038  | 8.12079 | 2.77671  | 0.0156637 | 0.99974 | 291.924 | -3.62516 |
| 10514388 | NA            | NA                                                                                     | 0.457991  | 3.49977 | 2.77644  | 0.0156718 | 0.99974 | 292.924 | -3.62533 |
| 10376196 | Hint1         | histidine triad nucleotide binding protein 1                                           | 0.304893  | 9.16877 | 2.77385  | 0.0157497 | 0.99974 | 293.924 | -3.62695 |
| 10450482 | NA            | NA                                                                                     | 0.386457  | 6.90366 | 2.77365  | 0.0157558 | 0.99974 | 294.923 | -3.62708 |
| 10491605 | 4932438A13Rik | RIKEN cDNA 4932438A13 gene                                                             | -0.377391 | 8.24483 | -2.7733  | 0.0157663 | 0.99974 | 295.923 | -3.6273  |
| 10376887 | Snord49a      | small nucleolar RNA, C/D box 49A                                                       | 0.397535  | 6.19869 | 2.76357  | 0.0160628 | 0.99974 | 296.923 | -3.6334  |
| 10548547 | Gm6600        | predicted gene 6600                                                                    | 0.392041  | 5.86945 | 2.76307  | 0.0160785 | 0.99974 | 297.923 | -3.63372 |
| 10566810 | Nrip3         | nuclear receptor interacting protein 3                                                 | -0.332061 | 6.36826 | -2.76291 | 0.0160833 | 0.99974 | 298.922 | -3.63381 |
| 10492448 | Ptx3          | pentraxin related gene                                                                 | 0.35197   | 6.84198 | 2.7622   | 0.0161052 | 0.99974 | 299.922 | -3.63426 |
| 10572046 | NA            | NA                                                                                     | 0.461166  | 3.18021 | 2.7614   | 0.0161298 | 0.99974 | 300.922 | -3.63476 |
| 10551264 | Cyp2b19       | cytochrome P450, family 2, subfamily b, polypeptide 19                                 | -0.315654 | 6.23883 | -2.76085 | 0.016147  | 0.99974 | 301.922 | -3.63511 |
| 10604930 | LOC100044102  | similar to syndecan-1                                                                  | -0.312489 | 6.90818 | -2.76029 | 0.0161641 | 0.99974 | 302.921 | -3.63545 |
| 10597648 | Myd88         | myeloid differentiation primary response gene 88                                       | 0.285525  | 7.39895 | 2.7586   | 0.0162164 | 0.99974 | 303.921 | -3.63651 |
| 10448184 | 4930515G13Rik | RIKEN cDNA 4930515G13 gene                                                             | 0.326428  | 6.26501 | 2.75714  | 0.016262  | 0.99974 | 304.921 | -3.63743 |
| 10400479 | Nkx2-9        | NK2 transcription factor related, locus 9 (Drosophila)                                 | -0.305865 | 6.55204 | -2.75675 | 0.0162742 | 0.99974 | 305.921 | -3.63768 |
| 10594426 | Zwilch        | Zwilch, kinetochore associated, homolog (Drosophila)                                   | -0.289387 | 5.91078 | -2.75567 | 0.0163077 | 0.99974 | 306.92  | -3.63835 |
| 10512093 | Ndufb6        | NADH dehydrogenase (ubiquinone) 1 beta subcomplex, 6                                   | 0.327167  | 8.29136 | 2.75554  | 0.0163118 | 0.99974 | 307.92  | -3.63843 |
| 10496357 | NA            | NA                                                                                     | 0.311912  | 4.672   | 2.7535   | 0.0163755 | 0.99974 | 308.92  | -3.63971 |
| 10520371 | Prr8          | proline rich 8                                                                         | 0.322029  | 9.6966  | 2.75143  | 0.0164408 | 0.99974 | 309.919 | -3.64102 |
| 10541188 | NA            | NA                                                                                     | -0.326433 | 7.79645 | -2.75104 | 0.016453  | 0.99974 | 310.919 | -3.64126 |
| 10361799 | Adat2         | adenosine deaminase, tRNA-specific 2, TAD2 homolog (S. cerevisiae)                     | 0.310254  | 7.14309 | 2.75091  | 0.0164569 | 0.99974 | 311.919 | -3.64134 |
| 10597960 | Slc6a20a      | solute carrier family 6 (neurotransmitter transporter), member 20A                     | -0.28156  | 7.59733 | -2.75064 | 0.0164654 | 0.99974 | 312.919 | -3.64151 |
| 10540785 | 6720456B07Rik | RIKEN cDNA 6720456B07 gene                                                             | 0.334452  | 7.95311 | 2.74971  | 0.0164949 | 0.99974 | 313.918 | -3.64209 |
| 10407211 | Ppap2a        | phosphatidic acid phosphatase type 2A                                                  | -0.343568 | 8.57041 | -2.74948 | 0.016502  | 0.99974 | 314.918 | -3.64224 |
| 10417144 | Timm8a2       | translocase of inner mitochondrial membrane 8 homolog a2 (yeast)                       | -0.280813 | 5.85967 | -2.74852 | 0.0165325 | 0.99974 | 315.918 | -3.64284 |
| 10501020 | Chi3l3        | chitinase 3-like 3                                                                     | 0.347228  | 10.1303 | 2.74818  | 0.0165431 | 0.99974 | 316.918 | -3.64305 |
| 10504912 | NA            | NA                                                                                     | 0.353118  | 8.35521 | 2.74818  | 0.0165431 | 0.99974 | 317.917 | -3.64305 |
| 10410576 | Cep72         | centrosomal protein 72                                                                 | -0.306078 | 6.16507 | -2.74722 | 0.0165735 | 0.99974 | 318.917 | -3.64365 |

|          |               |                                                                        |           |         |          |           |         |         |          |
|----------|---------------|------------------------------------------------------------------------|-----------|---------|----------|-----------|---------|---------|----------|
| 10427910 | Fam105b       | family with sequence similarity 105, member B                          | 0.342417  | 7.63535 | 2.7425   | 0.0167238 | 0.99974 | 319.917 | -3.64662 |
| 10391744 | Gpatch8       | G patch domain containing 8                                            | -0.501299 | 7.57807 | -2.74162 | 0.016752  | 0.99974 | 320.917 | -3.64717 |
| 10439289 | BC117090      | cDNA sequence BC1179090                                                | 0.343877  | 5.4424  | 2.74006  | 0.0168022 | 0.99974 | 321.916 | -3.64815 |
| 10386703 | Gm12271       | predicted gene 12271                                                   | 0.355078  | 5.65944 | 2.73963  | 0.0168161 | 0.99974 | 322.916 | -3.64842 |
| 10586140 | LctI          | lactase-like                                                           | -0.291252 | 6.37277 | -2.73958 | 0.0168176 | 0.99974 | 323.916 | -3.64845 |
| 10478875 | Rnf114        | ring finger protein 114                                                | 0.287889  | 7.51544 | 2.73526  | 0.0169573 | 0.99974 | 324.916 | -3.65117 |
| 10373649 | Olfr814       | olfactory receptor 814                                                 | 0.318474  | 3.8735  | 2.73261  | 0.0170432 | 0.99974 | 325.915 | -3.65283 |
| 10546229 | NA            | NA                                                                     | -0.33925  | 5.2266  | -2.73129 | 0.0170863 | 0.99974 | 326.915 | -3.65366 |
| 10385447 | Dppa1         | developmental pluripotency associated 1                                | 0.347811  | 5.25853 | 2.7301   | 0.0171252 | 0.99974 | 327.915 | -3.65441 |
| 10377255 | Stx8          | syntaxin 8                                                             | 0.29506   | 8.22335 | 2.72938  | 0.0171488 | 0.99974 | 328.915 | -3.65486 |
| 10531057 | Ugt2b5        | UDP glucuronosyltransferase 2 family, polypeptide B5                   | 0.381261  | 5.32092 | 2.72669  | 0.0172373 | 0.99974 | 329.914 | -3.65655 |
| 10535974 | Vmn2r18       | vomer nasal 2, receptor 18                                             | -0.343163 | 5.00723 | -2.72586 | 0.0172646 | 0.99974 | 330.914 | -3.65707 |
| 10428439 | NA            | NA                                                                     | 0.36987   | 4.77696 | 2.72484  | 0.0172986 | 0.99974 | 331.914 | -3.65772 |
| 10407946 | Stard3nl      | STARD3 N-terminal like                                                 | 0.351168  | 8.57844 | 2.72321  | 0.0173525 | 0.99974 | 332.913 | -3.65874 |
| 10536799 | Fam71f2       | family with sequence similarity 71, member F2                          | -0.298171 | 7.58363 | -2.71601 | 0.0175927 | 0.99974 | 333.913 | -3.66327 |
| 10563718 | Gm9717        | predicted gene 9717                                                    | 0.4219    | 6.64062 | 2.71197  | 0.0177293 | 0.99974 | 334.913 | -3.66582 |
| 10568180 | Cd2bp2        | CD2 antigen (cytoplasmic tail) binding protein 2                       | 0.302758  | 6.82396 | 2.711    | 0.017762  | 0.99974 | 335.913 | -3.66642 |
| 10441811 | NA            | NA                                                                     | 0.367456  | 8.49807 | 2.71095  | 0.0177639 | 0.99974 | 336.912 | -3.66646 |
| 10465764 | C730048C13Rik | RIKEN cDNA C730048C13 gene                                             | 0.375825  | 4.41497 | 2.71082  | 0.0177682 | 0.99974 | 337.912 | -3.66654 |
| 10474201 | Lmo2          | LIM domain only 2                                                      | 0.292474  | 8.38207 | 2.70898  | 0.0178309 | 0.99974 | 338.912 | -3.6677  |
| 10498323 | 4932431H17Rik | RIKEN cDNA 4932431H17 gene                                             | -0.308424 | 5.59173 | -2.70602 | 0.0179317 | 0.99974 | 339.912 | -3.66956 |
| 10565738 | 2210018M11Rik | RIKEN cDNA 2210018M11 gene                                             | -0.423527 | 8.90877 | -2.7029  | 0.0180392 | 0.99974 | 340.911 | -3.67153 |
| 10545009 | Pigy          | phosphatidylinositol glycan anchor biosynthesis, class Y               | 0.312172  | 7.50689 | 2.70281  | 0.0180422 | 0.99974 | 341.911 | -3.67158 |
| 10364153 | Gm9744        | predicted gene 9744                                                    | 0.307482  | 6.87018 | 2.69943  | 0.0181591 | 0.99974 | 342.911 | -3.67371 |
| 10550047 | Zscan22       | zinc finger and SCAN domain containing 22                              | 0.282489  | 7.1322  | 2.69427  | 0.0183387 | 0.99974 | 343.911 | -3.67696 |
| 10603706 | Med4          | mediator of RNA polymerase II transcription, subunit 4 homolog (yeast) | 0.315167  | 5.51836 | 2.69286  | 0.0183881 | 0.99974 | 344.91  | -3.67785 |
| 10442493 | NA            | NA                                                                     | 0.415765  | 4.54198 | 2.69257  | 0.0183986 | 0.99974 | 345.91  | -3.67804 |
| 10357472 | Cxcr4         | chemokine (C-X-C motif) receptor 4                                     | 0.315131  | 8.9317  | 2.69197  | 0.0184196 | 0.99974 | 346.91  | -3.67841 |
| 10491081 | NA            | NA                                                                     | -0.294466 | 5.91655 | -2.69165 | 0.0184308 | 0.99974 | 347.91  | -3.67861 |
| 10387723 | 2810408A11Rik | RIKEN cDNA 2810408A11 gene                                             | 0.280887  | 6.18501 | 2.68952  | 0.0185057 | 0.99974 | 348.909 | -3.67996 |
| 10346328 | Mars2         | methionine-tRNA synthetase 2 (mitochondrial)                           | 0.300953  | 9.71969 | 2.68913  | 0.0185197 | 0.99974 | 349.909 | -3.6802  |
| 10603373 | Pqbp1         | polyglutamine binding protein 1                                        | 0.287654  | 8.25801 | 2.6891   | 0.0185208 | 0.99974 | 350.909 | -3.68022 |
| 10598499 | Gm7079        | predicted gene 7079                                                    | 0.281435  | 10.019  | 2.68882  | 0.0185306 | 0.99974 | 351.909 | -3.6804  |

|          |               |                                                                       |           |         |          |           |         |         |          |
|----------|---------------|-----------------------------------------------------------------------|-----------|---------|----------|-----------|---------|---------|----------|
| 10372988 | Slc16a7       | solute carrier family 16 (monocarboxylic acid transporters), member 7 | -0.293054 | 7.9764  | -2.68648 | 0.0186134 | 0.99974 | 352.908 | -3.68187 |
| 10430679 | NA            | NA                                                                    | 0.709225  | 4.46876 | 2.68599  | 0.0186309 | 0.99974 | 353.908 | -3.68218 |
| 10562084 | Haus5         | HAUS augmin-like complex, subunit 5                                   | -0.468827 | 6.53923 | -2.68462 | 0.0186798 | 0.99974 | 354.908 | -3.68305 |
| 10367591 | Myct1         | myc target 1                                                          | 0.338226  | 7.45424 | 2.68243  | 0.018758  | 0.99974 | 355.908 | -3.68443 |
| 10414548 | Rnase6        | ribonuclease, RNase A family, 6                                       | 0.300025  | 8.2449  | 2.68211  | 0.0187694 | 0.99974 | 356.907 | -3.68463 |
| 10428004 | Ankrd33b      | ankyrin repeat domain 33B                                             | -0.283023 | 7.9188  | -2.68124 | 0.0188005 | 0.99974 | 357.907 | -3.68518 |
| 10536216 | Gng11         | guanine nucleotide binding protein (G protein), gamma 11              | 0.292181  | 7.5536  | 2.67769  | 0.0189284 | 0.99974 | 358.907 | -3.68742 |
| 10366512 | NA            | NA                                                                    | 0.318888  | 4.90257 | 2.67723  | 0.018945  | 0.99974 | 359.906 | -3.68771 |
| 10428119 | Cox6c         | cytochrome c oxidase, subunit VIc                                     | 0.345953  | 9.61016 | 2.67557  | 0.019005  | 0.99974 | 360.906 | -3.68875 |
| 10503188 | Chd7          | chromodomain helicase DNA binding protein 7                           | 0.45222   | 8.95395 | 2.67515  | 0.0190201 | 0.99974 | 361.906 | -3.68902 |
| 10406548 | NA            | NA                                                                    | 0.401106  | 5.66042 | 2.67498  | 0.0190266 | 0.99974 | 362.906 | -3.68913 |
| 10532921 | Sspl3         | signal peptide peptidase 3                                            | 0.360841  | 8.60754 | 2.67367  | 0.019074  | 0.99974 | 363.905 | -3.68995 |
| 10565349 | Vmn2r66       | vomer nasal 2, receptor 66                                            | -0.42567  | 4.77972 | -2.67125 | 0.0191622 | 0.99974 | 364.905 | -3.69148 |
| 10607950 | NA            | NA                                                                    | -0.305469 | 7.01033 | -2.67121 | 0.0191639 | 0.99974 | 365.905 | -3.69151 |
| 10507833 | Nt5c1a        | 5'-nucleotidase, cytosolic IA                                         | -0.281487 | 5.55849 | -2.66883 | 0.019251  | 0.99974 | 366.905 | -3.69301 |
| 10586441 | Oaz2          | ornithine decarboxylase antizyme 2                                    | 0.417518  | 7.67299 | 2.66797  | 0.0192825 | 0.99974 | 367.904 | -3.69355 |
| 10431722 | Glt8d3        | glycosyltransferase 8 domain containing 3                             | -0.31729  | 7.72883 | -2.66283 | 0.0194726 | 0.99974 | 368.904 | -3.6968  |
| 10491060 | Spin3         | spindlin family, member 3                                             | -0.344629 | 7.13346 | -2.66173 | 0.0195132 | 0.99974 | 369.904 | -3.69749 |
| 10352354 | A430110L20Rik | RIKEN cDNA A430110L20 gene                                            | -0.278134 | 7.16772 | -2.6557  | 0.019739  | 0.99974 | 370.904 | -3.7013  |
| 10592362 | Olfr160       | olfactory receptor 160                                                | -0.335113 | 5.3725  | -2.65529 | 0.0197543 | 0.99974 | 371.903 | -3.70156 |
| 10576881 | Gm7461        | predicted gene 7461                                                   | -0.270257 | 6.75971 | -2.65495 | 0.0197673 | 0.99974 | 372.903 | -3.70178 |
| 10387180 | Ndel1         | nuclear distribution gene E-like homolog 1 (A. nidulans)              | 0.281061  | 8.04729 | 2.6547   | 0.0197765 | 0.99974 | 373.903 | -3.70193 |
| 10488031 | NA            | NA                                                                    | 0.350107  | 4.31791 | 2.65403  | 0.0198016 | 0.99974 | 374.903 | -3.70236 |
| 10469457 | Plxdc2        | plexin domain containing 2                                            | -0.307107 | 10.9323 | -2.65183 | 0.0198849 | 0.99974 | 375.902 | -3.70375 |
| 10600044 | Prrg3         | proline rich Gla (G-carboxyglutamic acid) 3 (transmembrane)           | 0.37398   | 7.1249  | 2.64963  | 0.0199683 | 0.99974 | 376.902 | -3.70514 |
