# Supplementary material
Source: PubMed Central journal article supplement (PMC3497801)
Supplement: 1205374109_sd04.pdf [file 1205374109_sd04.pdf]

**Dataset S4: Functional enrichment analysis of genes with greater saline-to-OVA gene expression differentials ( $\Delta S-O$ ) in one strain than another**

| <b>A. <math>\Delta S-O</math> Tgfbm2/3 &gt; S-O NIH</b> |              |                | <b>B. <math>\Delta S-O</math> NIH &gt; S-O Tgfbm2/3</b> |              |                |
|---------------------------------------------------------|--------------|----------------|---------------------------------------------------------|--------------|----------------|
| <b>Term</b>                                             | <b>Count</b> | <b>P-Value</b> | <b>Term</b>                                             | <b>Count</b> | <b>P-Value</b> |
| microsome                                               | 13           | 4.00E-06       | acetylation                                             | 132          | 2.20E-13       |
| endoplasmic reticulum                                   | 33           | 1.80E-04       | protein biosynthesis                                    | 16           | 2.00E-05       |
| cytoplasm                                               | 101          | 2.30E-04       | centromere                                              | 9            | 2.10E-05       |
| disulfide bond                                          | 83           | 5.60E-04       | Chromosome partition                                    | 8            | 3.80E-05       |
| cytokine                                                | 13           | 7.40E-04       | cell cycle                                              | 30           | 9.50E-05       |
| phosphoprotein                                          | 182          | 8.50E-04       | ribonucleoprotein                                       | 21           | 1.60E-04       |
| signal                                                  | 95           | 9.70E-04       | chromosomal protein                                     | 14           | 1.60E-04       |
| membrane                                                | 160          | 1.50E-03       | atp synthesis                                           | 5            | 2.30E-04       |
| inflammatory response                                   | 8            | 2.40E-03       | phosphoprotein                                          | 228          | 3.80E-04       |
| chemotaxis                                              | 7            | 3.00E-03       | kinetochore                                             | 9            | 4.60E-04       |
| synaptosome                                             | 5            | 7.50E-03       | lysosome                                                | 13           | 1.40E-03       |
| oxidoreductase                                          | 24           | 9.90E-03       | rrna processing                                         | 8            | 1.90E-03       |
| Secreted                                                | 47           | 1.70E-02       | hydrogen ion transport                                  | 7            | 2.20E-03       |
| plasma                                                  | 4            | 1.90E-02       | ribosomal protein                                       | 14           | 2.60E-03       |
| cytoskeleton                                            | 23           | 2.30E-02       | mitosis                                                 | 14           | 3.10E-03       |
| macrophage                                              | 3            | 2.70E-02       | cell division                                           | 17           | 4.90E-03       |
| monooxygenase                                           | 7            | 4.30E-02       | methylation                                             | 15           | 6.40E-03       |
| coiled coil                                             | 53           | 4.40E-02       | atp-binding                                             | 53           | 1.70E-02       |
|                                                         |              |                | mitochondrion inner membrane                            | 12           | 2.20E-02       |
|                                                         |              |                | nucleotide-binding                                      | 63           | 3.00E-02       |
|                                                         |              |                | er-golgi transport                                      | 7            | 3.20E-02       |
|                                                         |              |                | DNA damage                                              | 12           | 3.20E-02       |
|                                                         |              |                | dna repair                                              | 11           | 3.60E-02       |
|                                                         |              |                | ATP                                                     | 10           | 3.90E-02       |
|                                                         |              |                | oxidoreductase                                          | 26           | 3.90E-02       |
|                                                         |              |                | proto-oncogene                                          | 7            | 4.30E-02       |
|                                                         |              |                | dna replication                                         | 7            | 4.30E-02       |
|                                                         |              |                | nucleotide binding                                      | 6            | 4.30E-02       |
|                                                         |              |                | sh3 domain                                              | 12           | 4.50E-02       |
|                                                         |              |                | p-loop                                                  | 6            | 4.60E-02       |
|                                                         |              |                | iron-sulfur                                             | 5            | 4.60E-02       |
|                                                         |              |                | exosome                                                 | 3            | 4.90E-02       |

N.B.  $\Delta S-O$  indicates differential in gene expression between saline and OVA
